# Supplementary material for: Halogen functionalized D–A–D-type unsymmetrical squaraine dyes for dye-sensitized solar cells
Source: Royal Society of Chemistry journal article supplement (doi:10.1039/d3ma00277b), 2023-01-01
Supplement: d3ma00277b1.pdf [file d3ma00277b1.pdf]

## Electronic Supplementary Information

### Halogen Functionalized D-A-D Type Unsymmetrical Squaraine Dyes for Dye-Sensitized Solar Cells

Indrajeet S. Nawghare,<sup>a,c</sup> Ambarish Kumar Singh,<sup>a,c</sup> Ashakiran Maibam,<sup>a,c</sup> Shivdeep Suresh Deshmukh,<sup>a,c</sup> Sailaja Krishnamurthy,<sup>a,c\*</sup> Kothandam Krishnamoorthy,<sup>a,b\*</sup> and Jayaraj Nithyanandhan,<sup>a,c\*</sup>

<sup>a</sup> Physical and Materials Chemistry Division, CSIR-National Chemical Laboratory, CSIR-Network of Institutes for Solar Energy, Dr. Homi Bhabha Road, Pune, India-411008.

<sup>b</sup> Polymer Science and Engineering Division, CSIR-National Chemical Laboratory, and CSIR-Network of Institutes for Solar Energy, Dr. Homi Bhabha Road, Pune 411008, India.

<sup>c</sup> Academy of Scientific and Innovative Research (AcSIR), Ghaziabad- 201002, India

\*Corresponding authors:

\*Email: [j.nithyanandhan@ncl.res.in](mailto:j.nithyanandhan@ncl.res.in); [k.krishnamoorthy@ncl.res.in](mailto:k.krishnamoorthy@ncl.res.in); [k.sailaja@ncl.res.in](mailto:k.sailaja@ncl.res.in)

## Contents

| Sr. No. | Contents                                                                                  | Page No. |
|---------|-------------------------------------------------------------------------------------------|----------|
| 1       | General methods                                                                           | S3       |
| 2       | $^1\text{H}$ and $^{13}\text{C}$ NMR spectra of <b>ISQ</b> dyes                           | S5       |
| 3       | IR studies of <b>ISQ</b> dyes.                                                            | S9       |
| 4       | Mass spectrometric studies of <b>ISQ</b> dyes.                                            | S10      |
| 5       | Fluorescence quantum yield of <b>ISQ</b> dyes                                             | S12      |
| 6       | Molar Extinction coefficient study of <b>ISQ</b> dyes                                     | S15      |
| 7       | UV-visible absorption spectra of <b>ISQ</b> dyes on $\text{TiO}_2$ surface                | S17      |
| 8       | Cyclic voltammogram of <b>ISQ-F</b> dye in MeCN and calculation of $E_{\text{ox vs NHE}}$ | S18      |
| 9       | DFT studies of <b>ISQ</b> dyes                                                            | S20      |
| 10      | Device performance of <b>ISQ</b> dyes                                                     | S27      |
| 11      | Dye desorption studies of <b>ISQ</b> dyes                                                 | S28      |
| 12      | EIS measurements of <b>ISQ</b> dyes                                                       | S29      |
| 13      | Co-ordinates for the optimized structures                                                 | S31      |
| 14      | Description of orbital occupancy of the donors and acceptors                              | S117     |
| 15      | References                                                                                | S117     |

**General methods.** All the chemicals and reagents required for the synthesis of **ISQ** dyes were purchased from commercial sources, and standard procedures are used for drying of solvents.  $^1\text{H}$ - and  $^{13}\text{C}$ - NMR spectra were recorded on Bruker NMR spectrometers AV 200 MHz, AV 400 MHz and AV-500 MHz frequency, in  $\text{CDCl}_3$ . MALDI-TOF-MS was recorded on ABSciex 5800 MALDI TOF mass spectrometer. 4-hydroxy-3-5-dimethoxycinnamic acid (Sinapic acid) has been used for matrix preparation. Bruker FTIR spectrometer has been used to measure the IR-spectrum for **ISQ** dyes. Absorption spectra of **ISQ** dyes were recorded on SPECORD<sup>®</sup> 210/ PLUS, Analytikjena UV–Visible spectrophotometer at room temperature. For the light-harvesting efficiency (LHE) calculations, 6  $\mu\text{m}$  thin film of  $\text{TiO}_2$  coated on the transparent glass slide was dipped in 0.1 mM **ISQ** dye solution for 12 h at room temperature, then absorption spectra were recorded on SPECORD<sup>®</sup> 210/ PLUS, Analytikjena UV-visible spectrophotometer at room temperature and converted into light-harvesting efficiency ( $\text{LHE} = 1-10^{-A}$ ). Fluorescence and lifetime of **ISQ** dyes were recorded on Edinburgh spectrofluorometer FS5 at room temperature. Cyclic voltammetry (CV) of **ISQ** dyes were performed on Biologic SP300 potentiostat in anhydrous  $\text{CH}_2\text{Cl}_2$  solvent at 25 °C under an inert atmosphere, where platinum wire as a working electrode, platinum foil as a counter electrode, non-aqueous  $\text{Ag}/\text{AgNO}_3$  (0.01M) as reference electrode,  $\text{TBAClO}_4$  (0.1 M) as supporting electrolyte and Ferrocene/Ferrocene<sup>+</sup> as an external reference, scan rate was 50  $\text{mVs}^{-1}$ . Potential measured vs  $\text{Fc}/\text{Fc}^+$  (eV) were converted to NHE (V) by addition of 0.7 V.  $E_{0.0}$  optical band gap have been calculated from  $1240/\lambda$ , where  $\lambda$  is intersection point of absorption and fluorescence spectra of the **ISQ** dyes. Electrochemical impedance measurements (EIS) were performed using a BioLogic SP300 potentiostat equipped with a frequency response analyzer. EIS studies were carried out in dark with various applied potential and frequency ranges from 3 MHz to 10 mHz with sinus amplitude of 10 mV. For  $I$ - $V$  characteristics of the cells were measured by using PHOTO EMISSION TECH (PET,

CT200AAA, USA) solar-simulator, and IPCE measurements were carried out with a Newport QE measurement kit. All the quantum mechanical calculations were conducted by using the Gaussian 09 software. The optimization of the ground-state geometry was carried out at the Density Functional Theory (DFT) level, using the B3LYP/6-311G\*\* and B3LYP/LANL2DZ atomic basis sets.

**DSSC fabrication.** Fluorine-doped SnO<sub>2</sub> glass (8- 10 Ω /sq; Pilkington TEC 7) was washed with mucasol (2 % in water), de-ionized water, and isopropanol by using ultrasonic-bath to make cleaned. To grow a thin film TiO<sub>2</sub>, FTO was treated with 40 mM aqueous TiCl<sub>4</sub> solution at 70 °C for 30 min, washed with the de-ionized water then EtOH, and dried at 110 °C for 10 min. A paste of TiO<sub>2</sub> nanocrystal (< 20 nm, Ti-Nanoxide T/SP, Solaronix) was coated on FTO conducting side by using doctor-blade technique and kept for 15 min in the air then heated at 120 °C in the air for 20 min, then coated with scattering layer TiO<sub>2</sub> paste (WER2-O, Dyesol) and heated at 120 °C for 10 min in the air, then sintered at 325 °C for 10 min, 375 °C for 10 min, 450 °C for 10 min and 500 °C for 15 min where the heating rate was 5 °C per min in the air. After completion of sintering, films were treated with 40 mM aqueous TiCl<sub>4</sub> solution at 70 °C for 30 min, washed with the de-ionized water then with EtOH and sintered at 500 °C for 20 min. Then cells (area of TiO<sub>2</sub> is 0.23 cm<sup>2</sup>) were immersed in 0.1 mM of **ISQ** dyes solution for 12 h. Platinum foil used as a cathode, 25 μm spacer, iodolyte Z-50 and Z-150 (Solaronix) were used as electrolytes, and area of black mask was 0.36 cm<sup>2</sup>. The device performance of **ISQ** dyes were measured under standard simulator condition (AM 1.5 G, 100 mW/cm<sup>2</sup>).

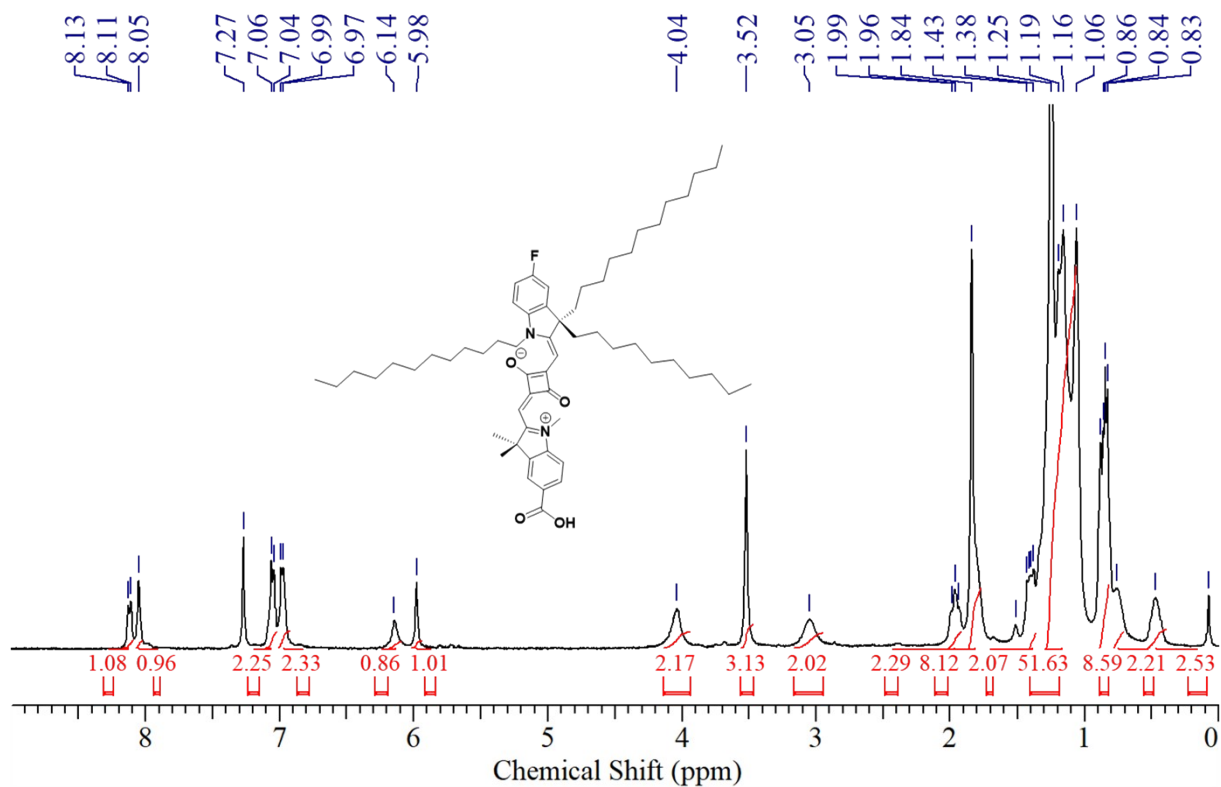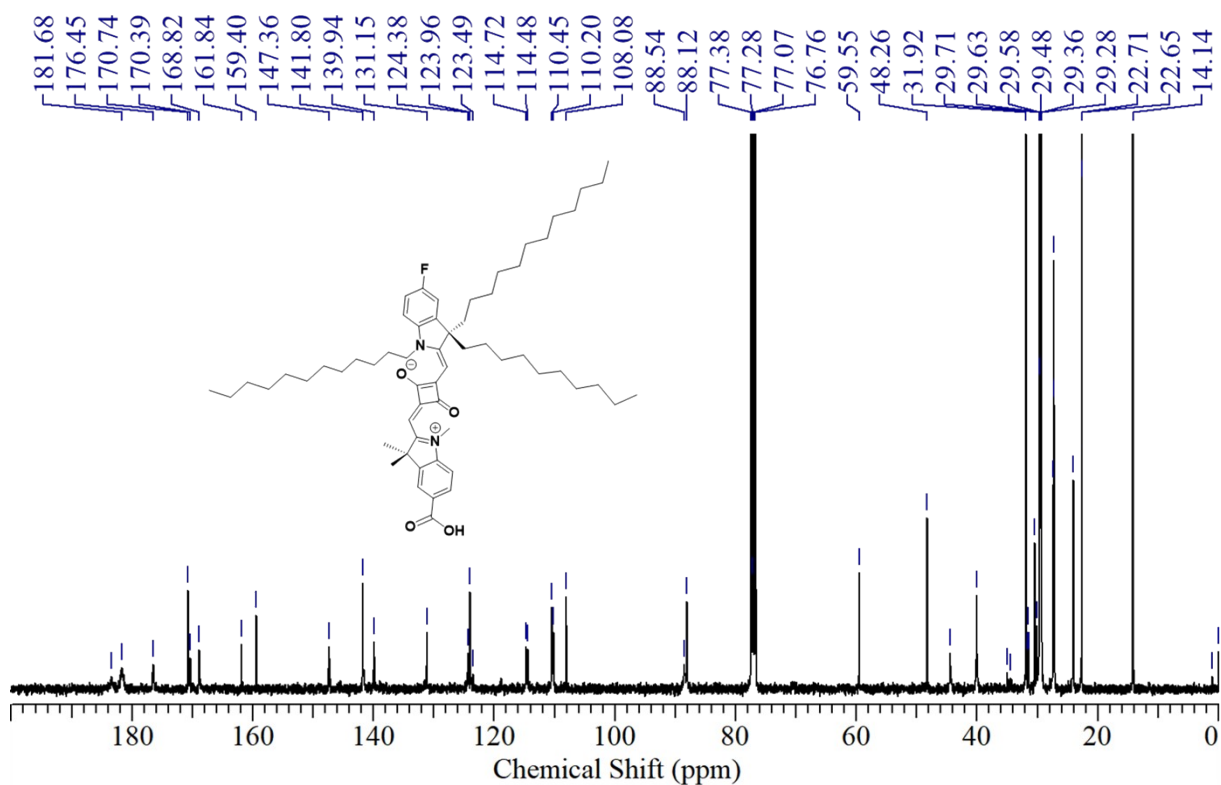

**Figure S1.** <sup>1</sup>H-NMR and <sup>13</sup>C NMR spectra of ISQF dye in CDCl<sub>3</sub>.

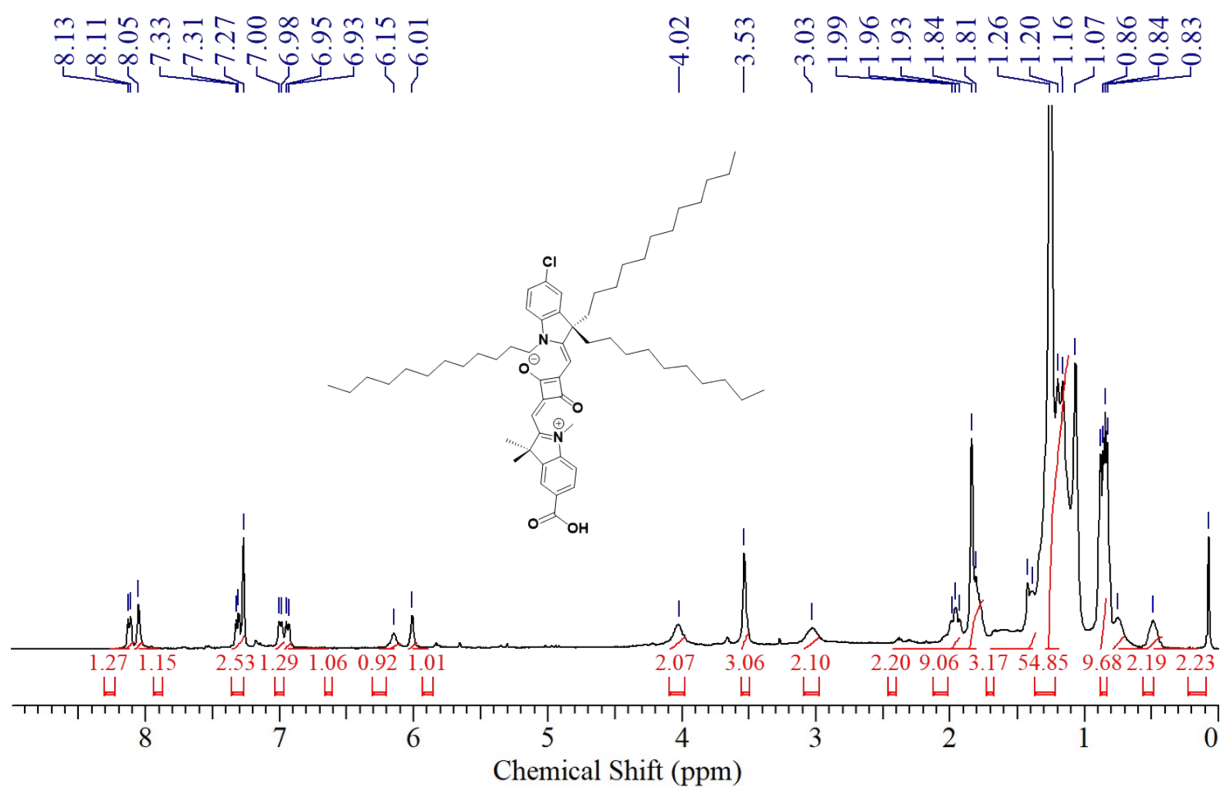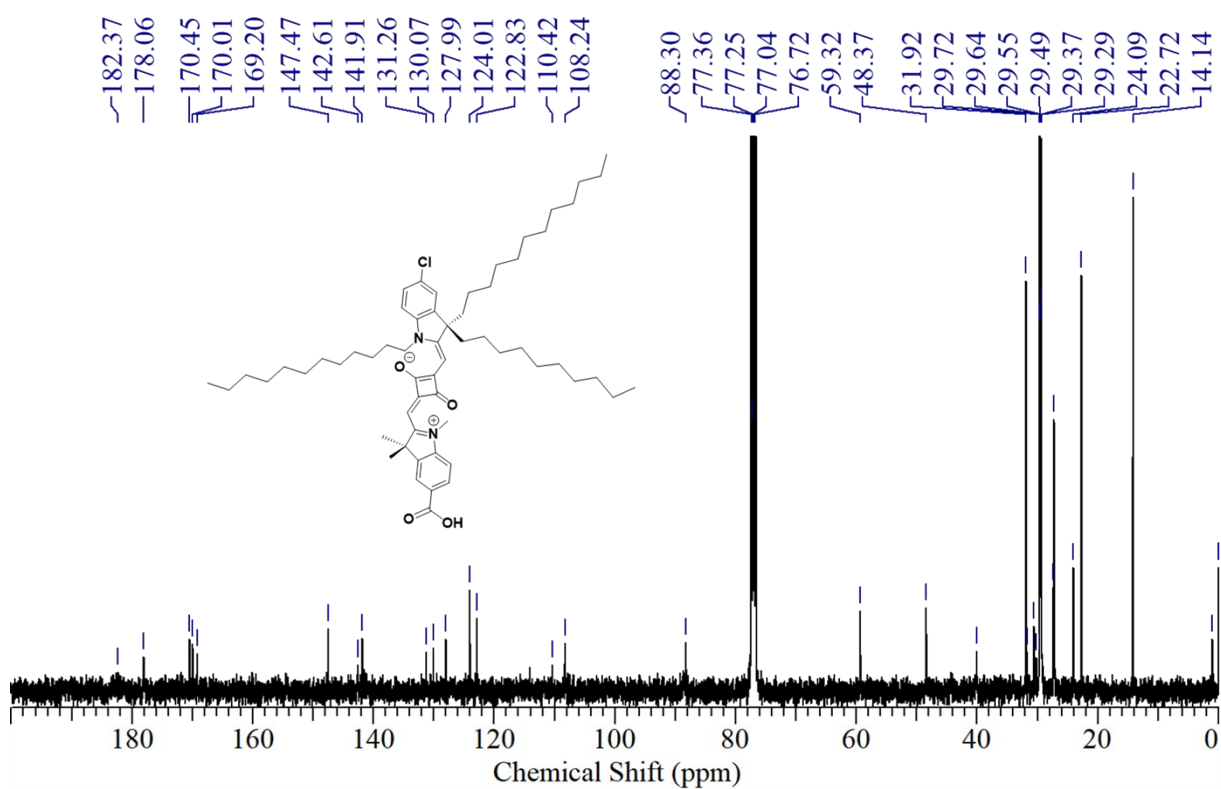

**Figure S2.**  $^1\text{H}$ -NMR and  $^{13}\text{C}$  NMR spectra of ISQCl dye in  $\text{CDCl}_3$ .

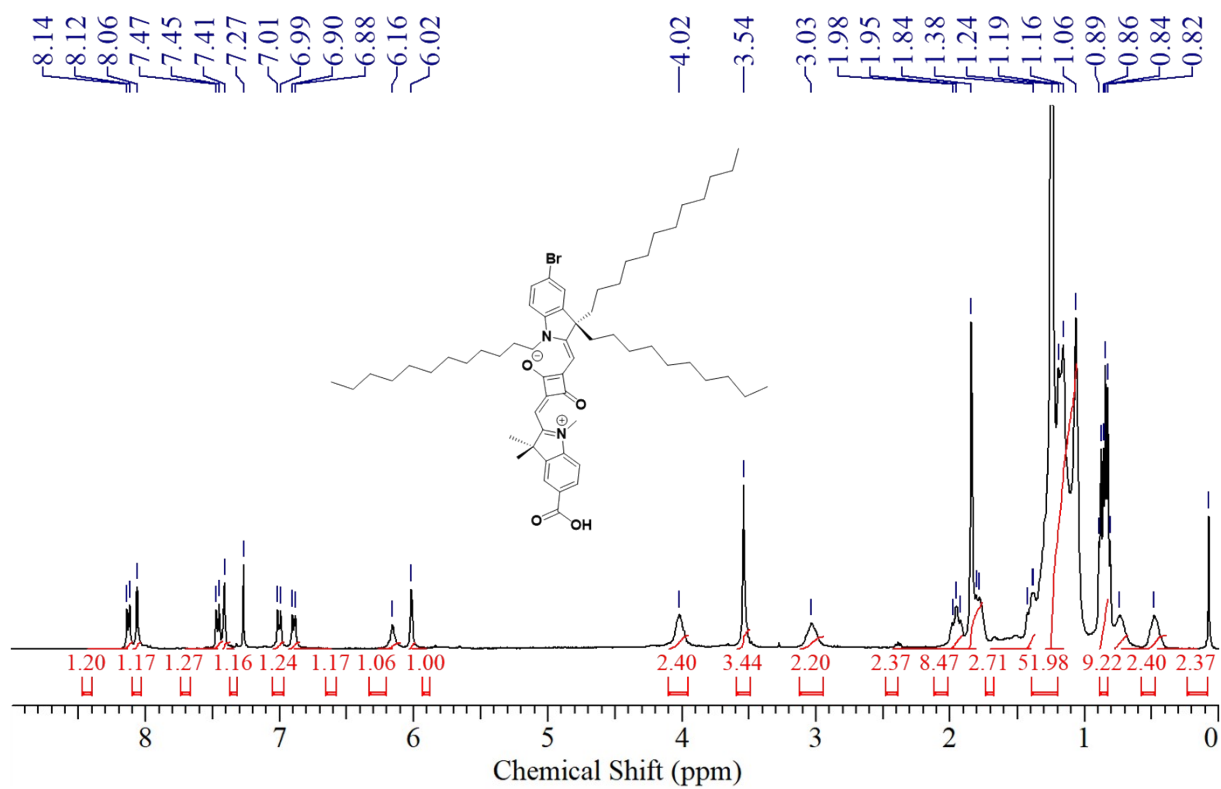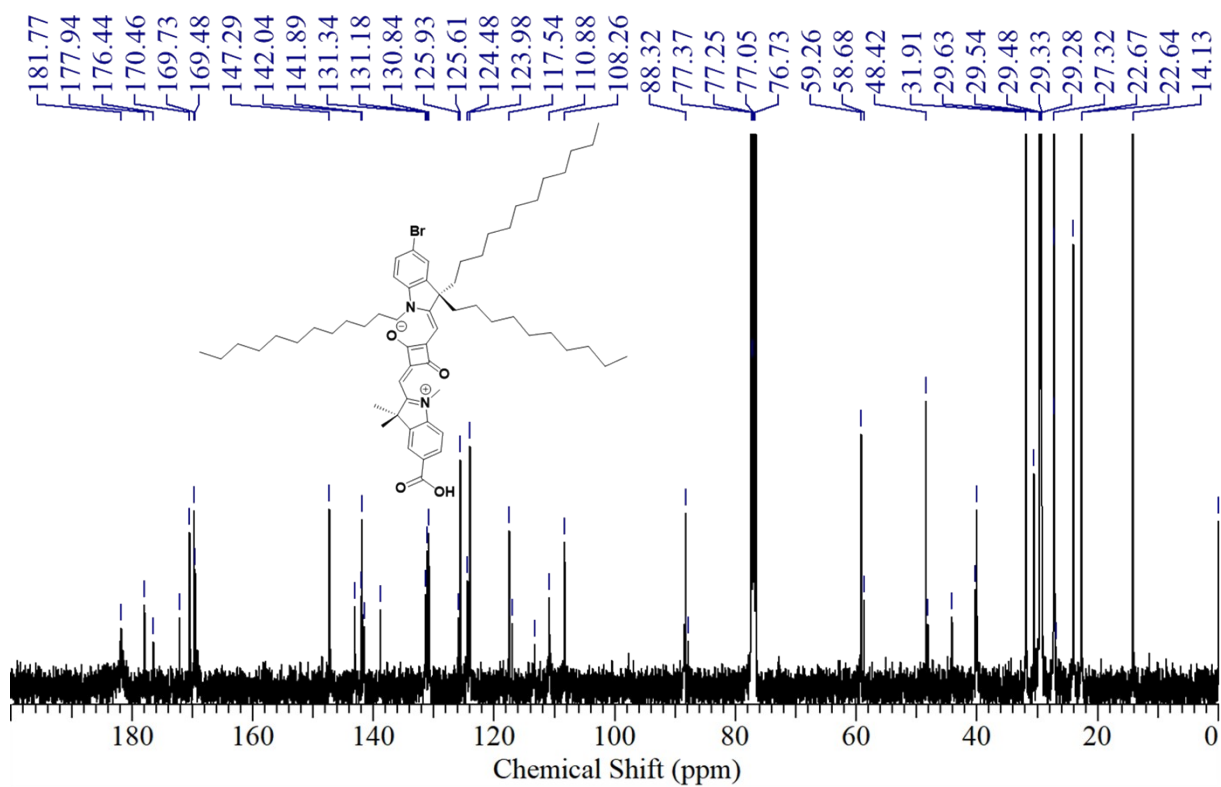

**Figure S3.** <sup>1</sup>H-NMR and <sup>13</sup>C NMR spectra of ISQBr dye in CDCl<sub>3</sub>.

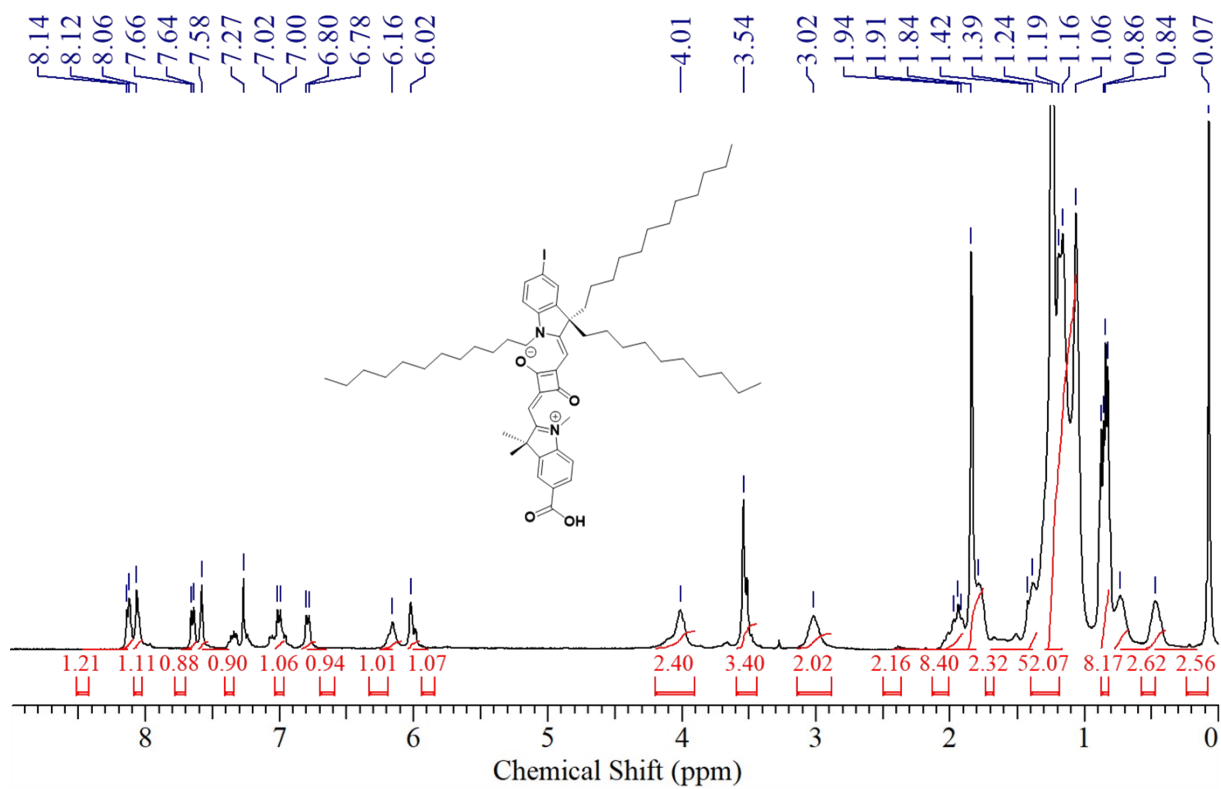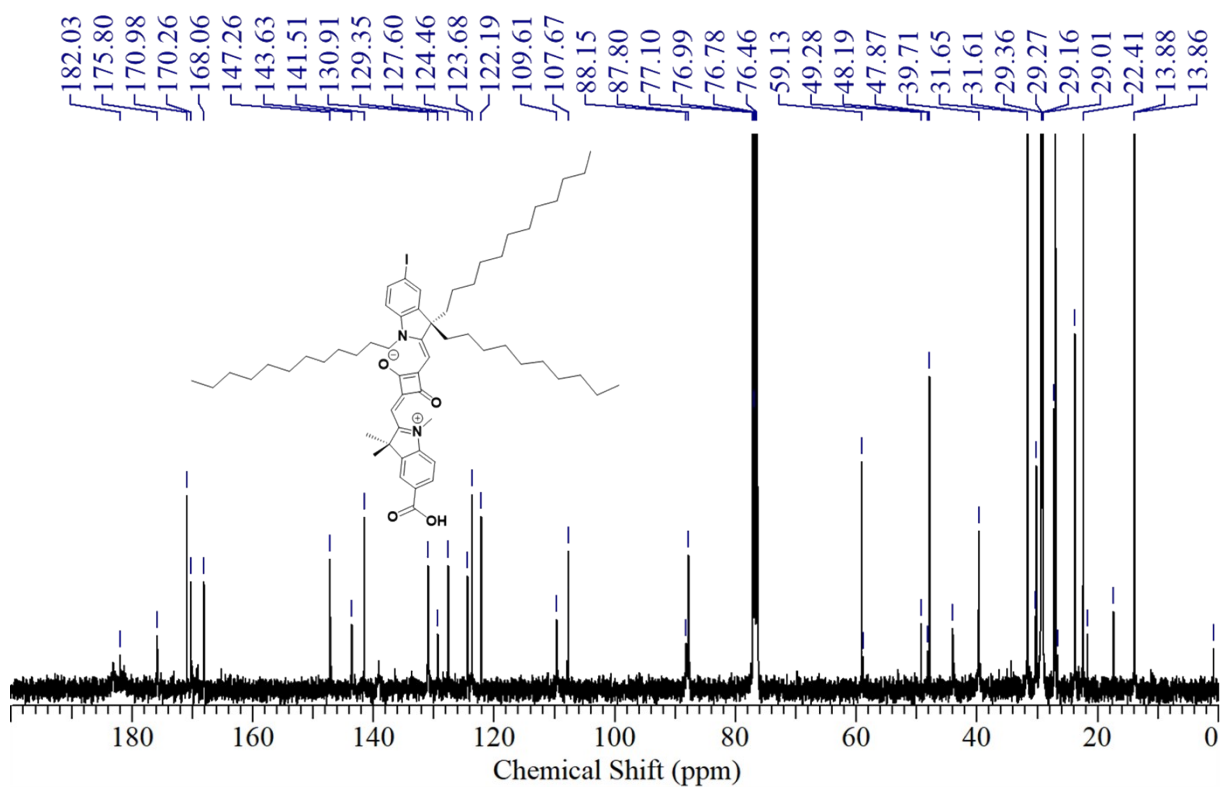

**Figure S4.**  $^1\text{H-NMR}$  and  $^{13}\text{C-NMR}$  spectra of ISQI dye in  $\text{CDCl}_3$ .



$^1\text{H}$  NMR Spectra of the final dye molecules showed two singlet peaks for the vinylene protons between 5.98-6.16 ppm which is the indication of unsymmetrical nature of squaraine dyes. Further, the IR-spectra for ISQF, ISQCl, ISQBr, and ISQI dyes were given in **figure S5**. The stretching frequency for carboxylic acid group appeared at  $1699\text{ cm}^{-1}$  and squaric acid carbonyl peaks were appeared at  $1598\text{ cm}^{-1}$ ,  $1567\text{ cm}^{-1}$  with the difference of few wave numbers for all the dyes.

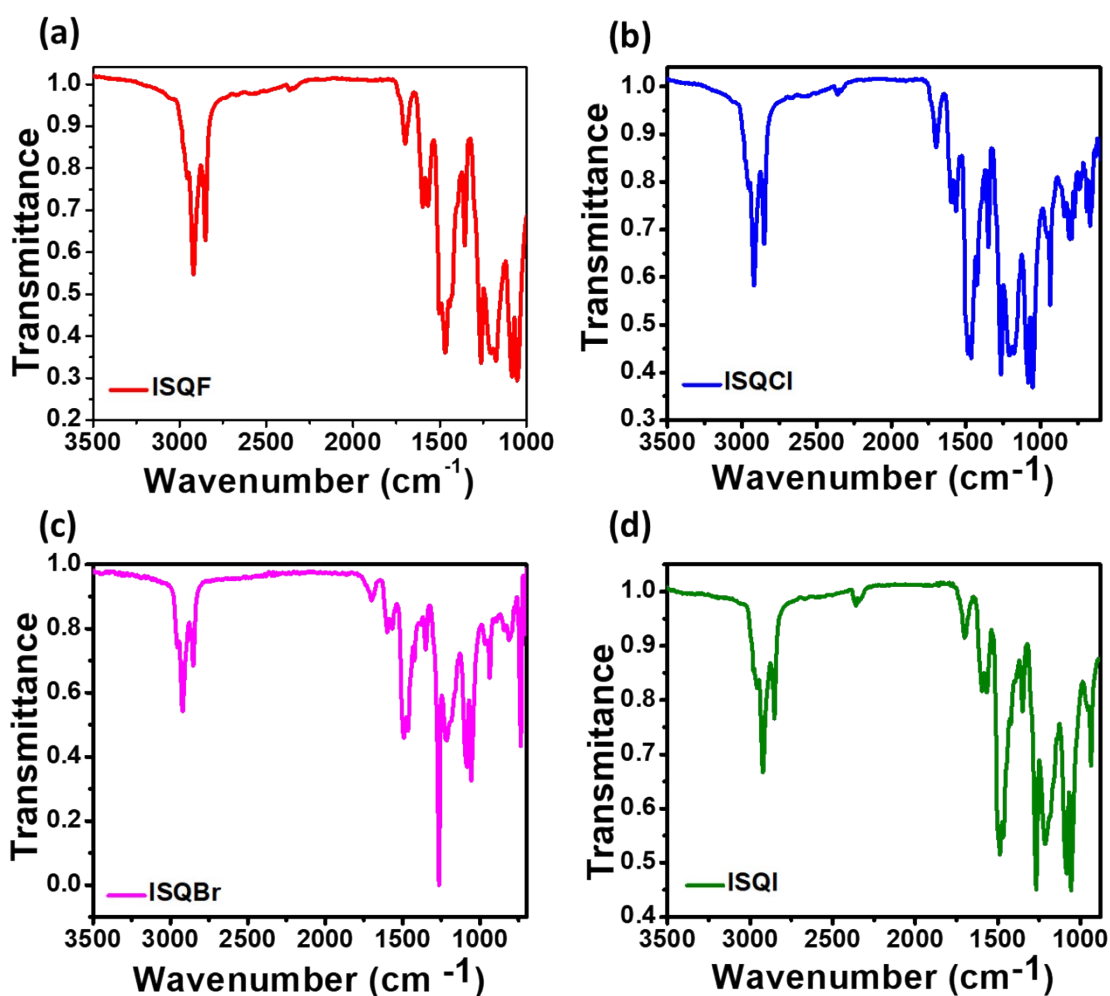

**Figure S5.** IR spectra of ISQ dyes.

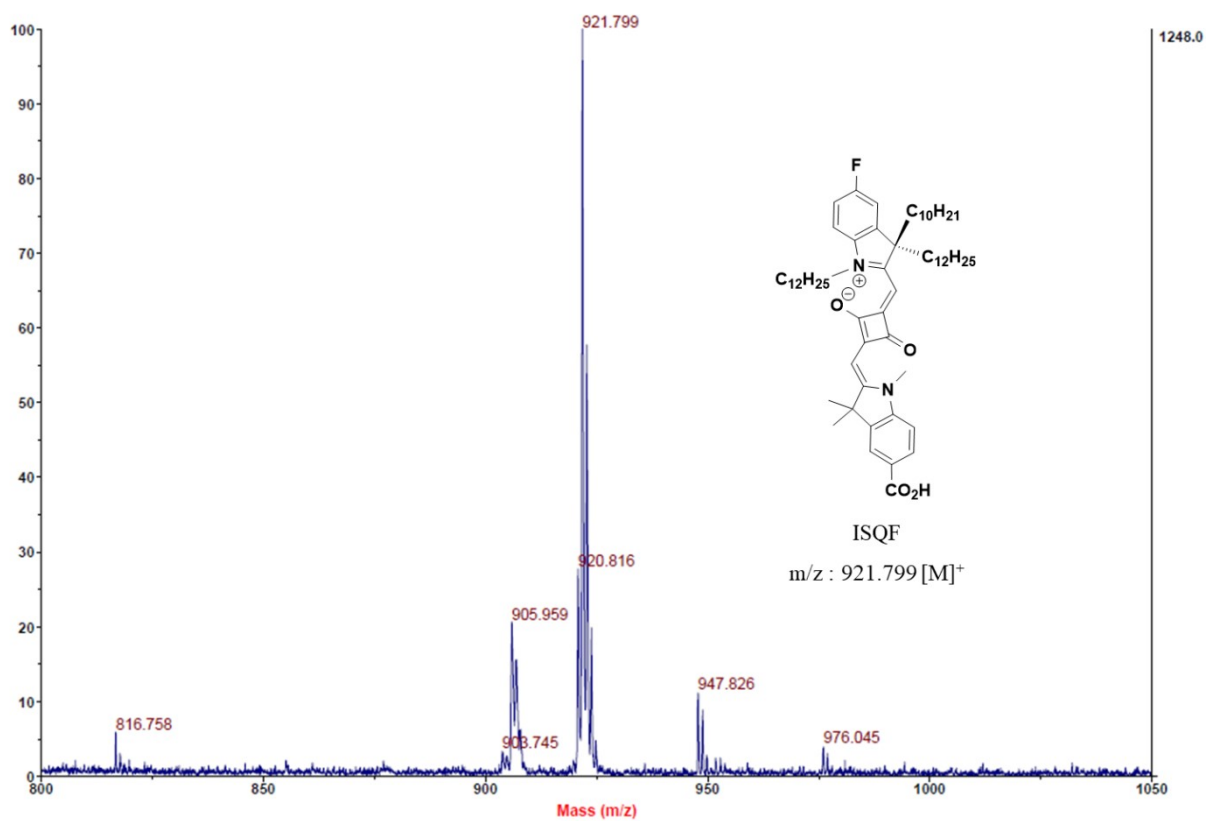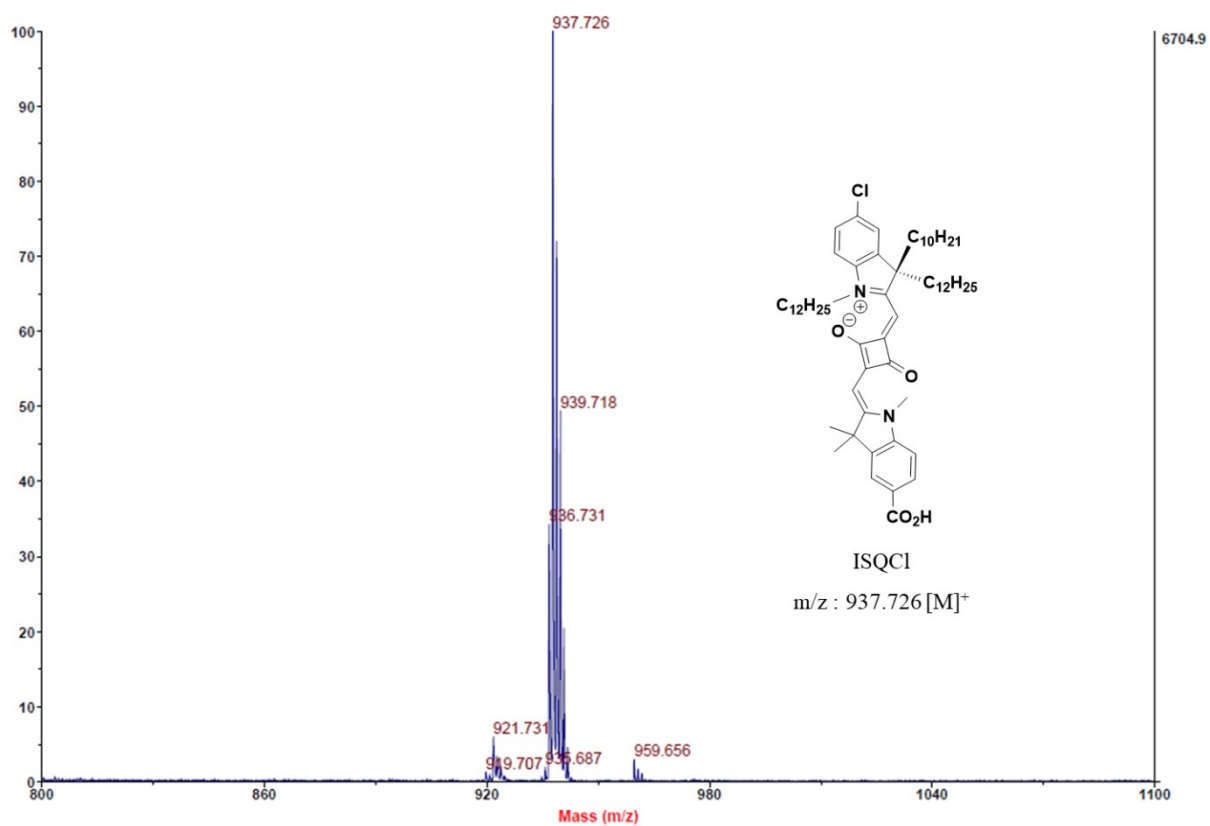

**Figure S6.** MALDI-TOF-MS spectra of ISQF and ISQCl dyes.

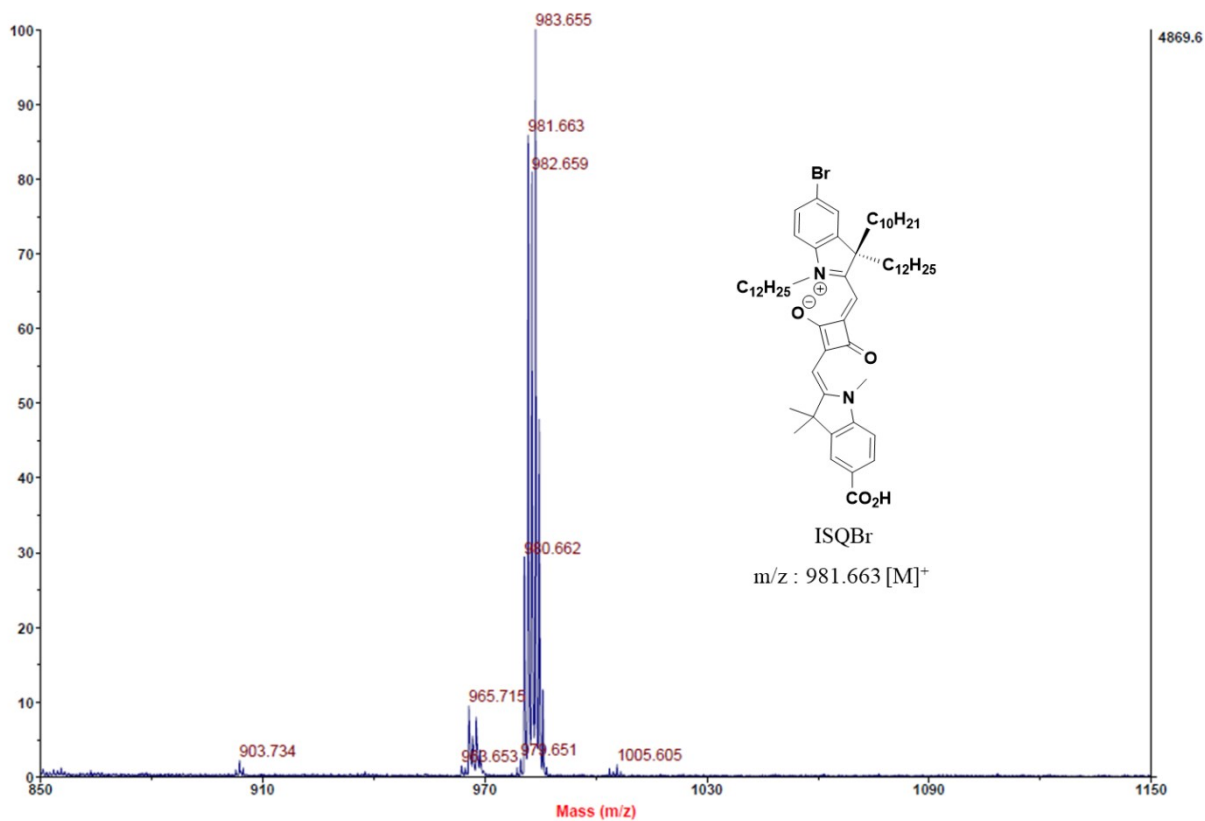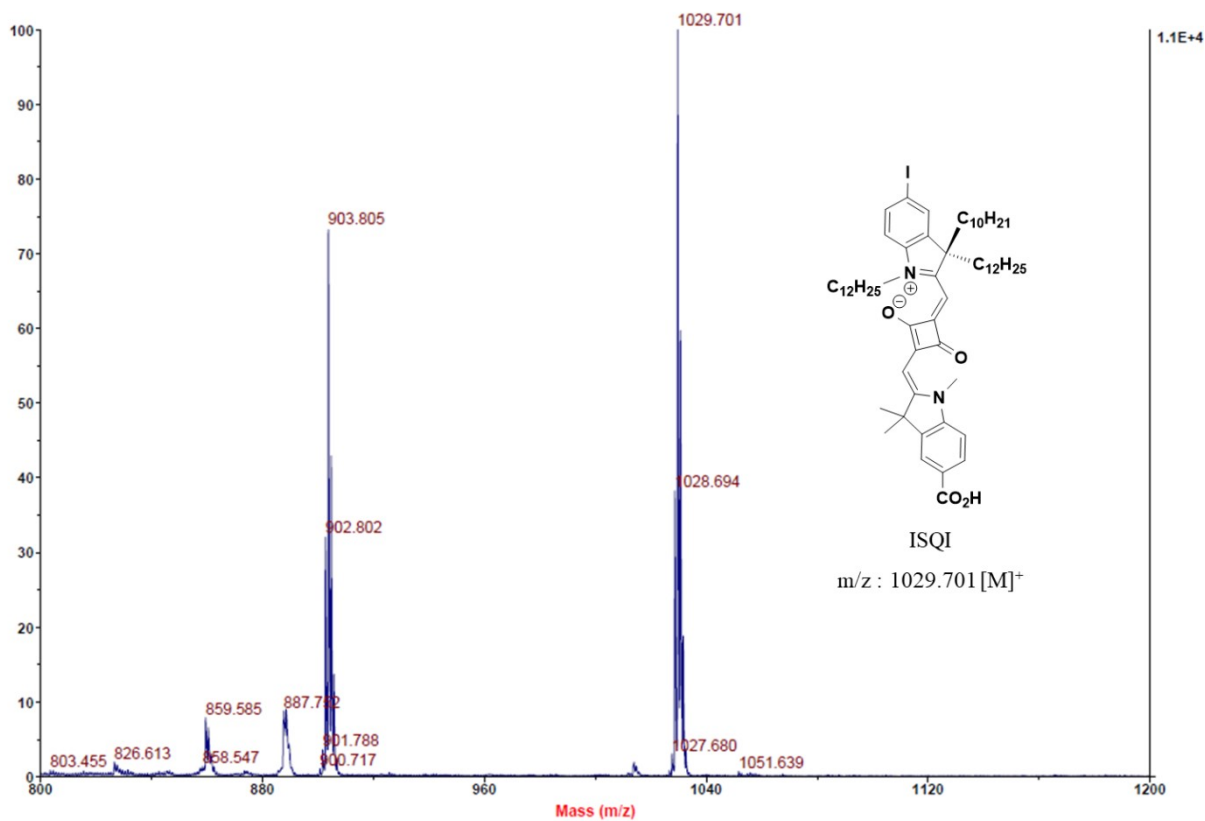

Figure S7. MALDI-TOF-MS spectra of ISQBr and ISQI dyes.

**Fluorescence quantum yield of ISQ dyes.** Fluorescence quantum yield is calculated relative method, according to the formula.

$$\phi_u = \frac{A_s \times F_u \times n_u^2}{A_u \times F_s \times n_s^2} \times \phi_s$$

Where  $\phi_s$  and  $\phi_u$  is quantum yield of the unknown sample and of the reference compound,  $A_s$  and  $A_u$  are the absorbance of the standard and unknown sample respectively,  $F_s$  and  $F_u$  are the integrated area under the fluorescence curve of the standard and the sample respectively,  $n_s^2$  and  $n_u^2$  are the refractive indexes of the solvent in which the reference and the unknown sample is dissolved respectively. **DMASQ**<sup>1</sup> was used as a reference dye which has quantum yield  $\phi_s = 0.42$  in dichloromethane.  $F_s = 256719$  for standard dye, and emission recorded from 610 to 800 nm.

**Table S1.** Fluorescence quantum yield of **ISQ** dyes.

| Dyes         | $\lambda_{ex}(nm)$ | $A_s$  | $A_u$  | $A_{s/u}$ | $F_u$  | $F_{u/s}$ | $\phi_u$ | Reference dye <sup>1</sup><br><b>DMASQ</b>                                                                        |
|--------------|--------------------|--------|--------|-----------|--------|-----------|----------|-------------------------------------------------------------------------------------------------------------------|
| <b>SQS4</b>  | 596                | 0.0114 | 0.0118 | 0.96      | 176656 | 0.68      | 0.279    | $F_s = 256719,$<br>$\phi_s = 0.42$<br>$\lambda_{em} = 610 - 800 \text{ nm}$<br>Solvent = $\text{CH}_2\text{Cl}_2$ |
| <b>ISQF</b>  | 599                | 0.0137 | 0.0138 | 0.99      | 210790 | 0.82      | 0.342    |                                                                                                                   |
| <b>ISQCl</b> | 593                | 0.0095 | 0.0096 | 0.98      | 215960 | 0.84      | 0.349    |                                                                                                                   |
| <b>ISQBr</b> | 593                | 0.0095 | 0.0096 | 0.98      | 201371 | 0.78      | 0.325    |                                                                                                                   |
| <b>ISQI</b>  | 590                | 0.0081 | 0.0076 | 1.0       | 179255 | 0.69      | 0.312    |                                                                                                                   |

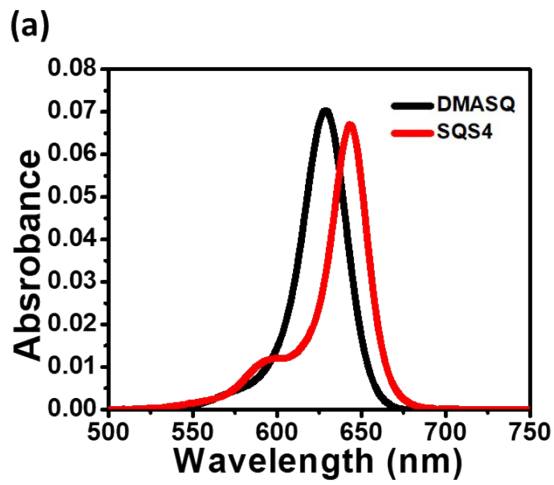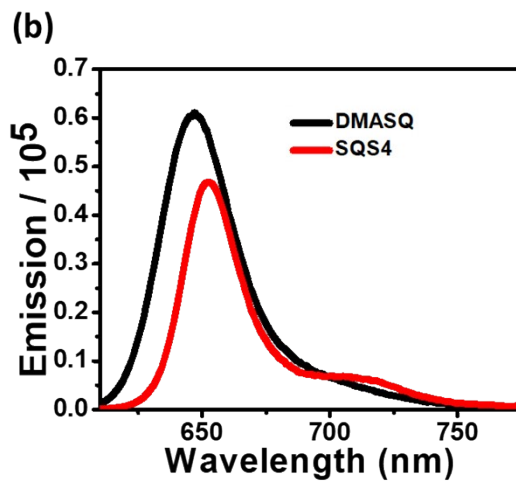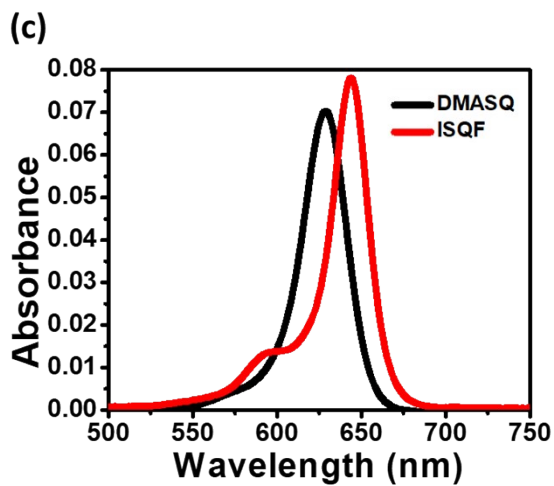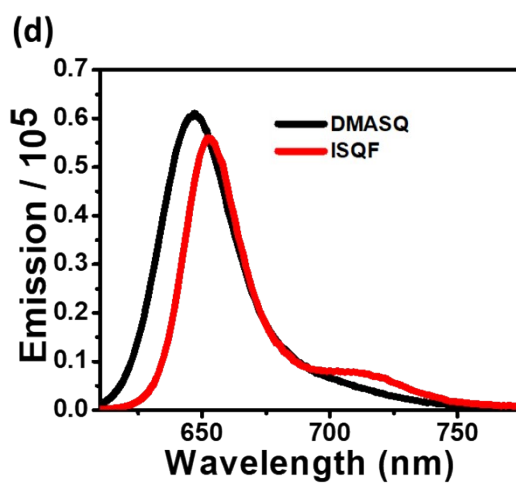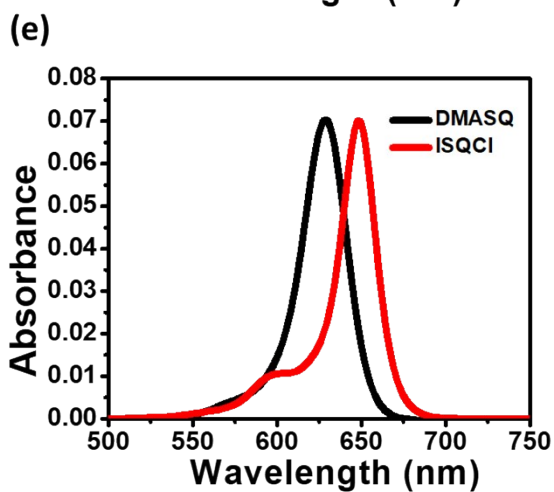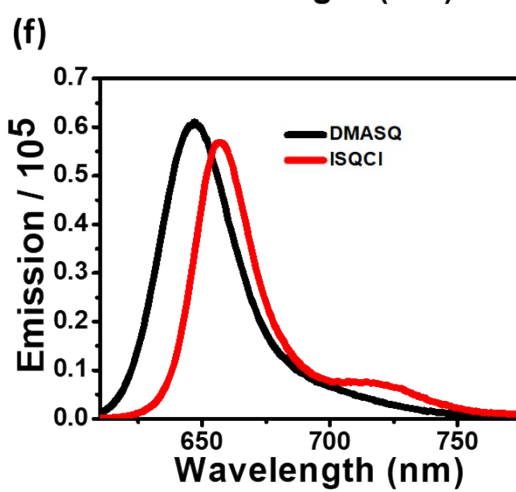

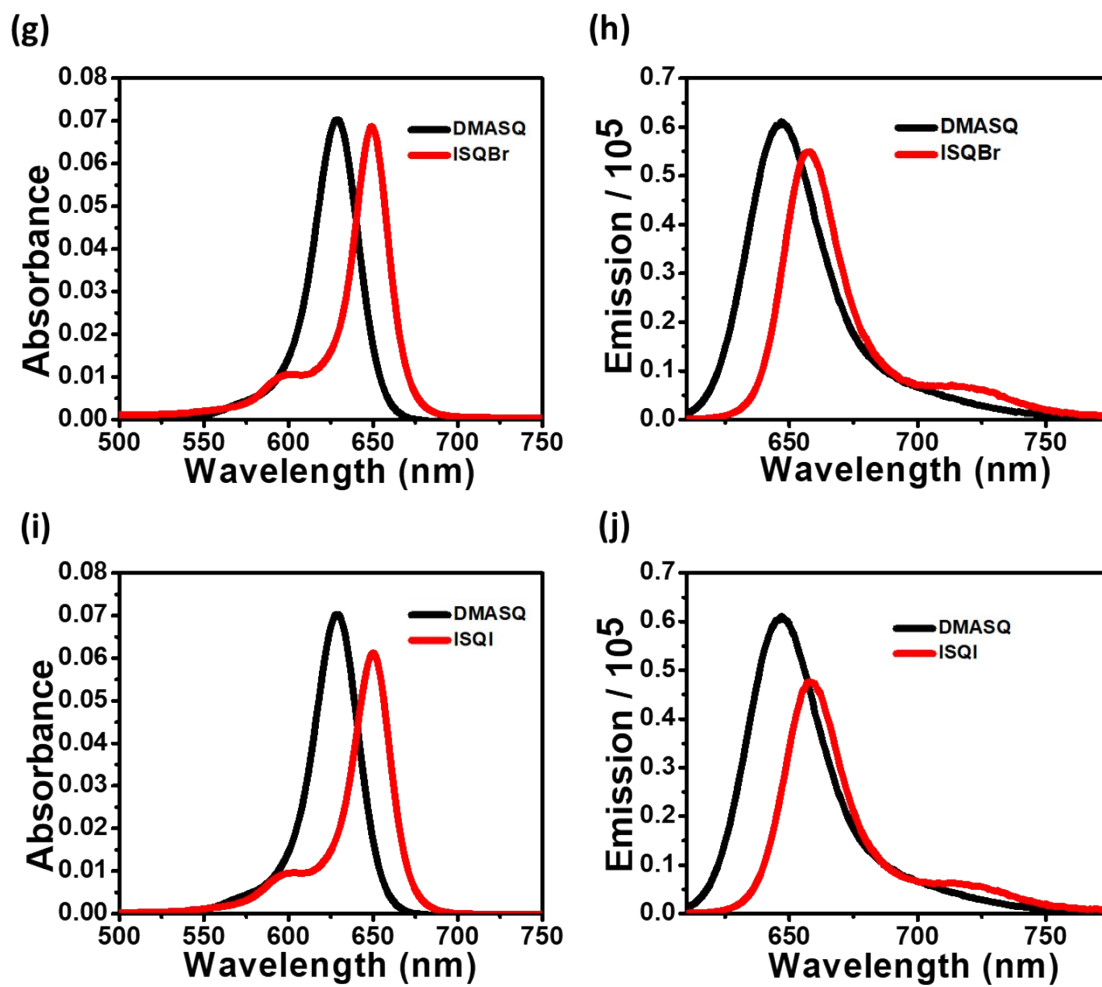

Figure S8. Absorption and Emission spectra (a - j) of ISQ dye in dichloromethane solution.

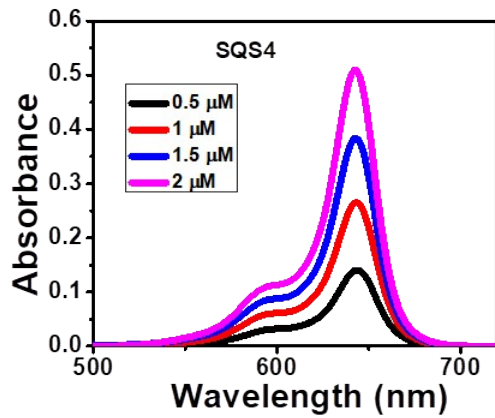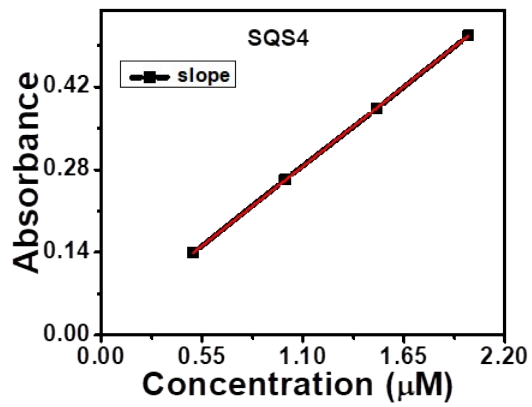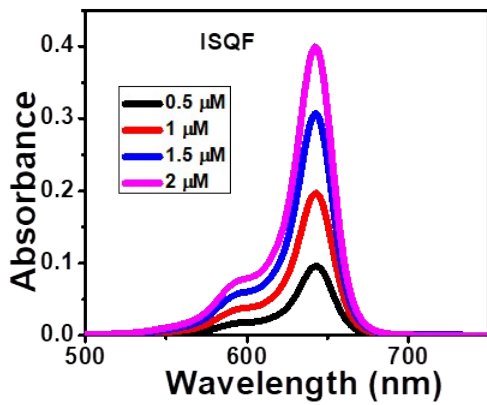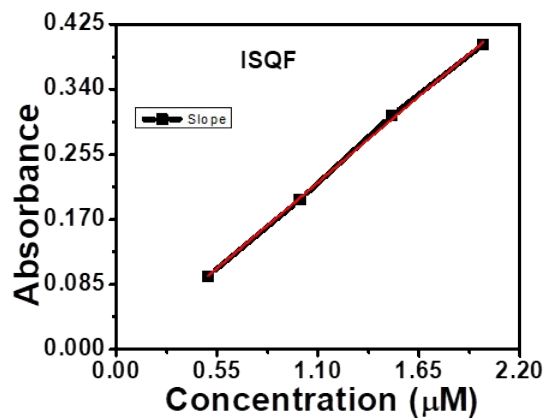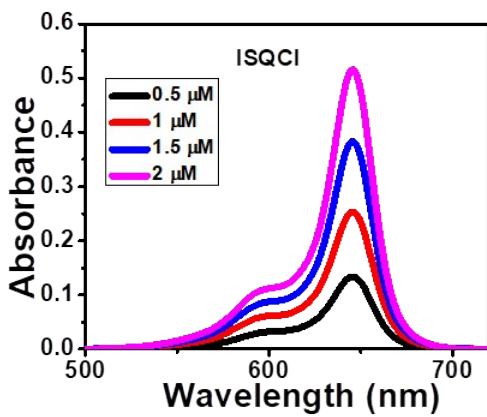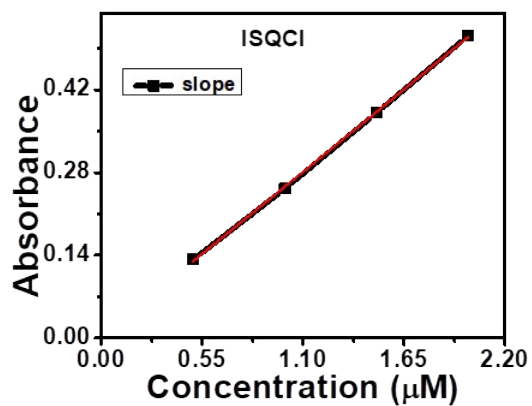

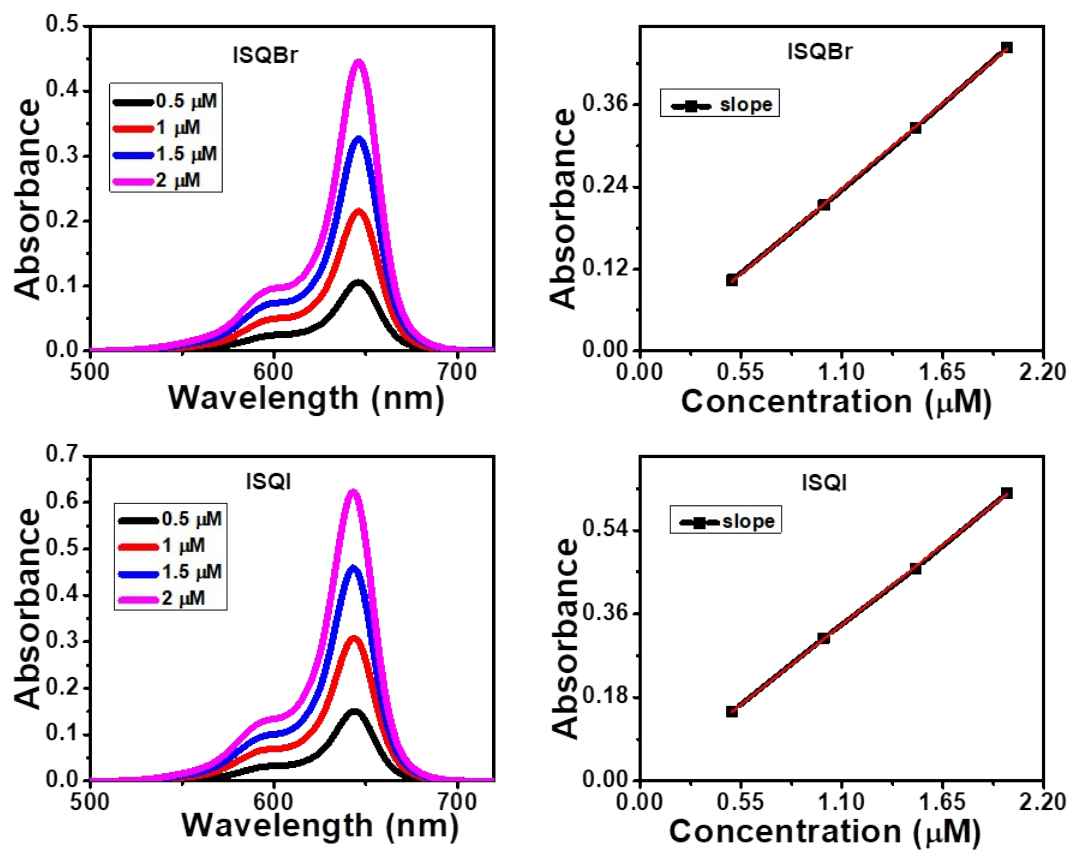

**Figure S9.** UV-Vis absorption spectra dyes at various concentrations (left), Beer-Lambert plots (right) of **ISQ** and **SQS4** dyes in  $\text{CH}_3\text{CN}:\text{CHCl}_3$  (95% : 5%) solution (used quartz cuvette of 1.0 cm path length)



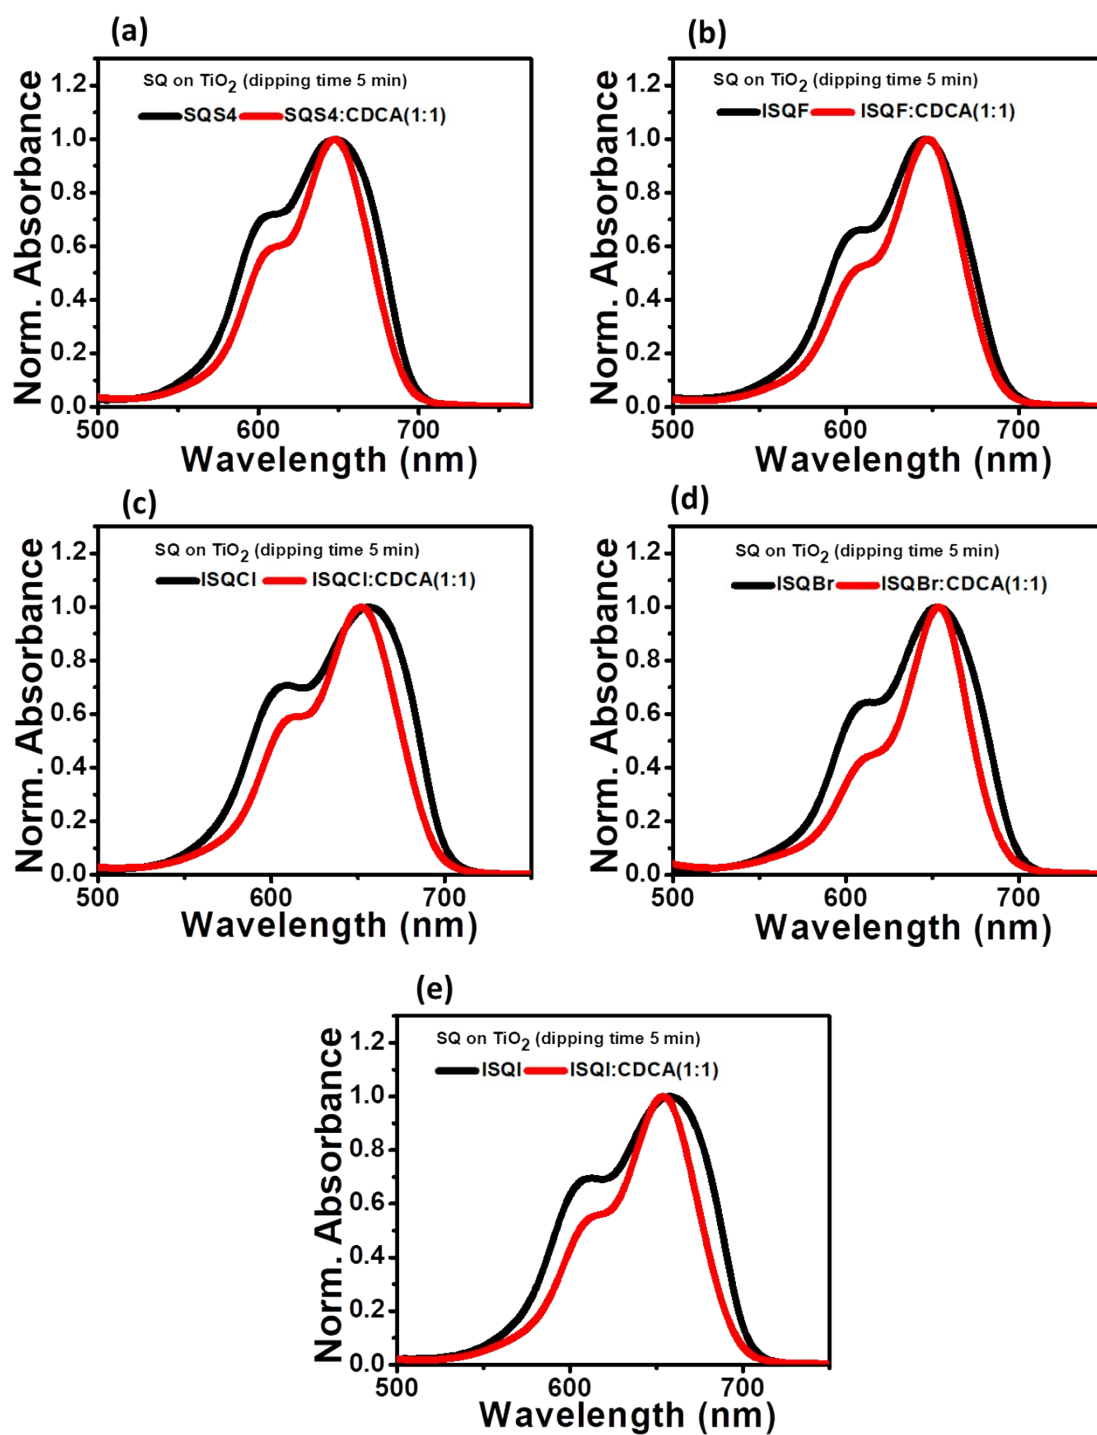

**Figure S10.** (a – e) Normalized absorption spectra of ISQ and SQS4 dyes on TiO<sub>2</sub> film with and without CDCA (TiO<sub>2</sub> film, thickness = 6 μm, dipping time = 5 min)

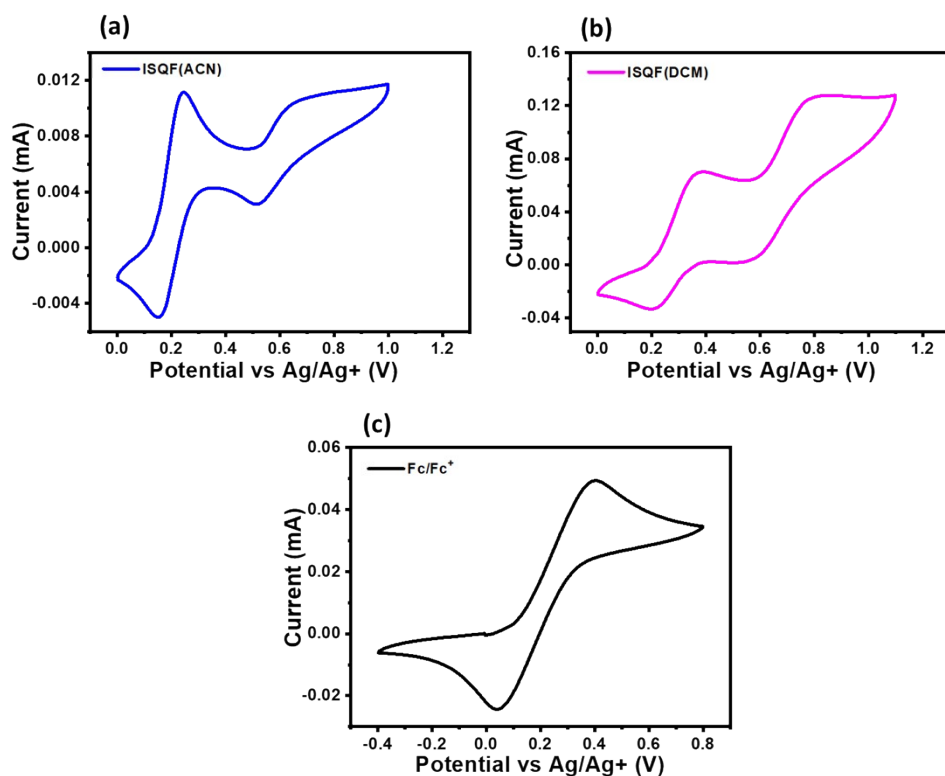

**Figure S11.** (a) Cyclic voltammograms of ISQF dye in CH<sub>3</sub>CN, (b) Cyclic voltammograms of ISQF dye in CH<sub>2</sub>Cl<sub>2</sub>, (c) Cyclic voltammograms of Fc/Fc<sup>+</sup> dye in CH<sub>2</sub>Cl<sub>2</sub>.

$E_{ox}$  of the sensitizers have been measured by using the reference electrode of Ag/AgNO<sub>3</sub> and converted the potentials vs NHE by calibrating with Ferrocene/ Ferrocenium (Fc/Fc<sup>+</sup>) potential. Further, ferrocene was used as an external reference.<sup>2</sup>

$$E_{ox} = E_{onset} - E_{Fc/Fc^+} + 0.7$$

Where,  $E_{Fc/Fc^+}$  is onset potential of Fc/Fc<sup>+</sup> in dichloromethane solutions (0.132 V, CV of ferrocene was provided in Figure S11(c) under the similar experimental conditions.

Calculation of  $E_{ox}$  and  $E_{ox^*}$  for the ISQF sensitizer is provided below,

$$E_{ox} = 0.218 - 0.132 + 0.7 = 0.786 \text{ V}$$

$$E_{ox^*} = E_{ox} - E_{0-0}$$

$$E_{ox^*} = 0.786 \text{ V} - 1.91 \text{ V}$$

$$E_{ox^*} = -1.12 \text{ V}$$

**Table S2.** Electrochemical characterizations of **ISQF** dye in two different solvents at room temperature.

| <b>Dyes</b>             | ${}^c E_{\text{oxi/onset}}$<br>(V vs Ag/Ag <sup>+</sup> ) | $E_{\text{ox}}$<br>(V vs NHE) | $E_{\text{ox}^*}$<br>(V vs NHE) | ${}^d E_{0-0}$<br>(eV) |
|-------------------------|-----------------------------------------------------------|-------------------------------|---------------------------------|------------------------|
| <b>ISQF<sup>a</sup></b> | 0.218                                                     | 0.786                         | -1.12                           | 1.91                   |
| <b>ISQF<sup>b</sup></b> | 0.172                                                     | 0.740                         | -1.17                           | 1.91                   |

<sup>a</sup>CH<sub>2</sub>Cl<sub>2</sub>, <sup>b</sup>CH<sub>3</sub>CN

## DFT study of ISQ dyes.

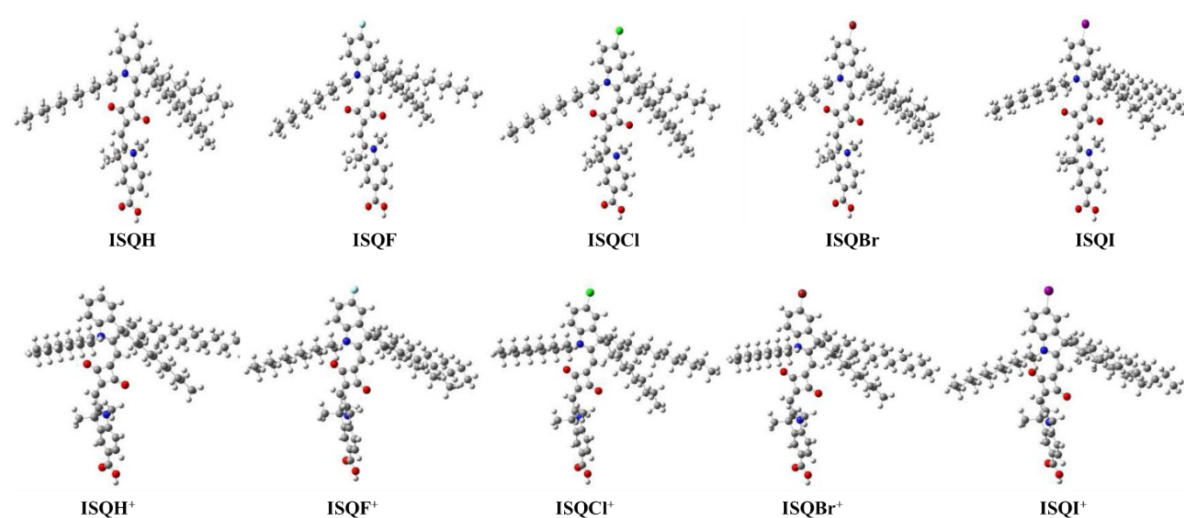

**Figure S12.** Optimized structures of ISQ dyes.

**Table S3.** Dipole moment and dihedral angles of ISQ dyes.

| Dye                   | Dipole moment, <b>D</b> ( $D_x$ , $D_y$ , $D_z$ ) $D_{tot}$ |                              | Dihedral N-O angles <b>D1</b> , <b>D2</b> |              |
|-----------------------|-------------------------------------------------------------|------------------------------|-------------------------------------------|--------------|
|                       | Neutral                                                     | Charged                      | Neutral                                   | Charged      |
| <b>ISQH</b><br>(SQS4) | (-1.38, -0.16, 4.46)<br>4.67                                | (0.41, -3.82, 6.49)<br>7.54  | 4.50, 20.99                               | 32.62, 30.46 |
| <b>ISQF</b>           | (-0.83, -1.15, 1.48)<br>2.05                                | (1.03, -0.80, 8.16)<br>8.27  | 11.79, 20.61                              | 32.39, 30.29 |
| <b>ISQCl</b>          | (-0.59, -0.94, 1.97)<br>2.26                                | (-0.15, -0.70, 7.73)<br>7.76 | 2.76, 20.78                               | 32.80, 30.05 |
| <b>ISQBr</b>          | (-0.71, 1.09, 2.04)<br>2.42                                 | (2.28, -0.88, 8.21)<br>8.56  | 6.09, 20.85                               | 31.50, 30.29 |
| <b>ISQI</b>           | (-1.19, -1.23, 2.01)<br>2.64                                | (2.34, -0.92, 8.06)<br>8.44  | 6.39, 20.87                               | 32.36, 29.77 |

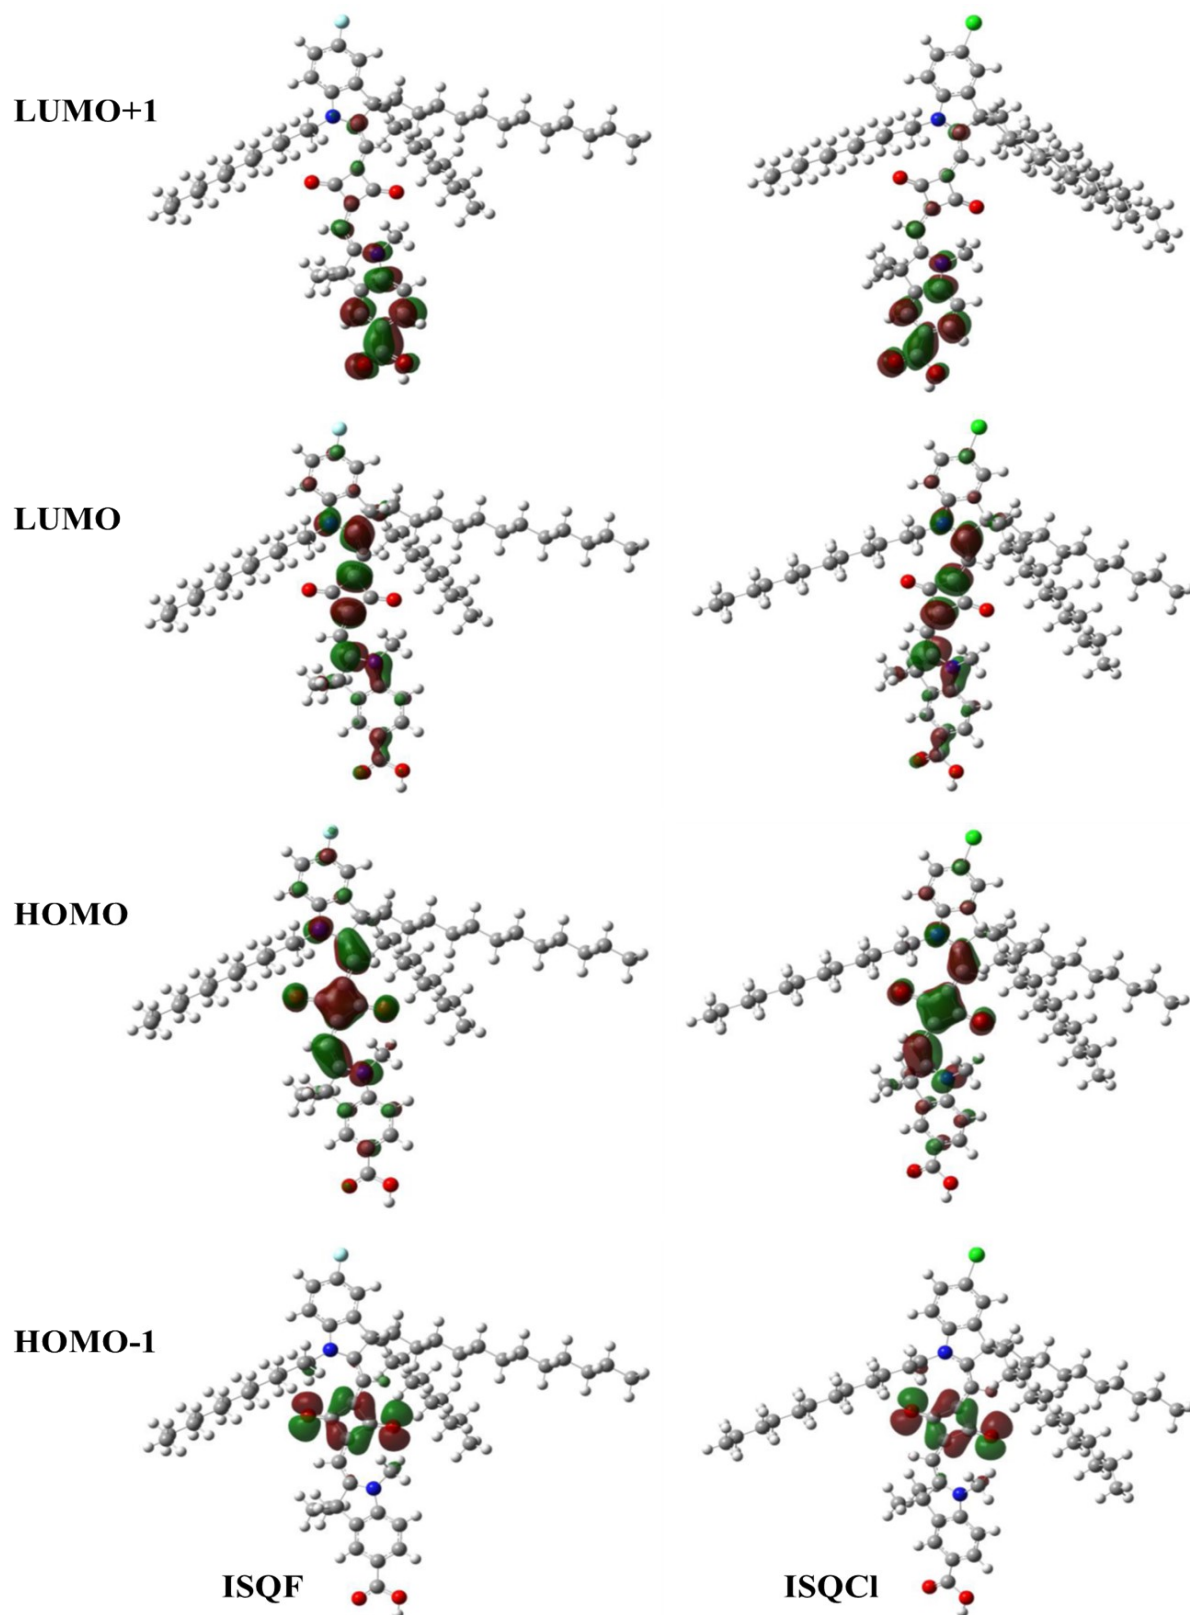

**Figure S13.** The calculated energy levels (HOMO, HOMO-1, LUMO, LUMO+1) of **ISQF** and **ISQCl** dyes.

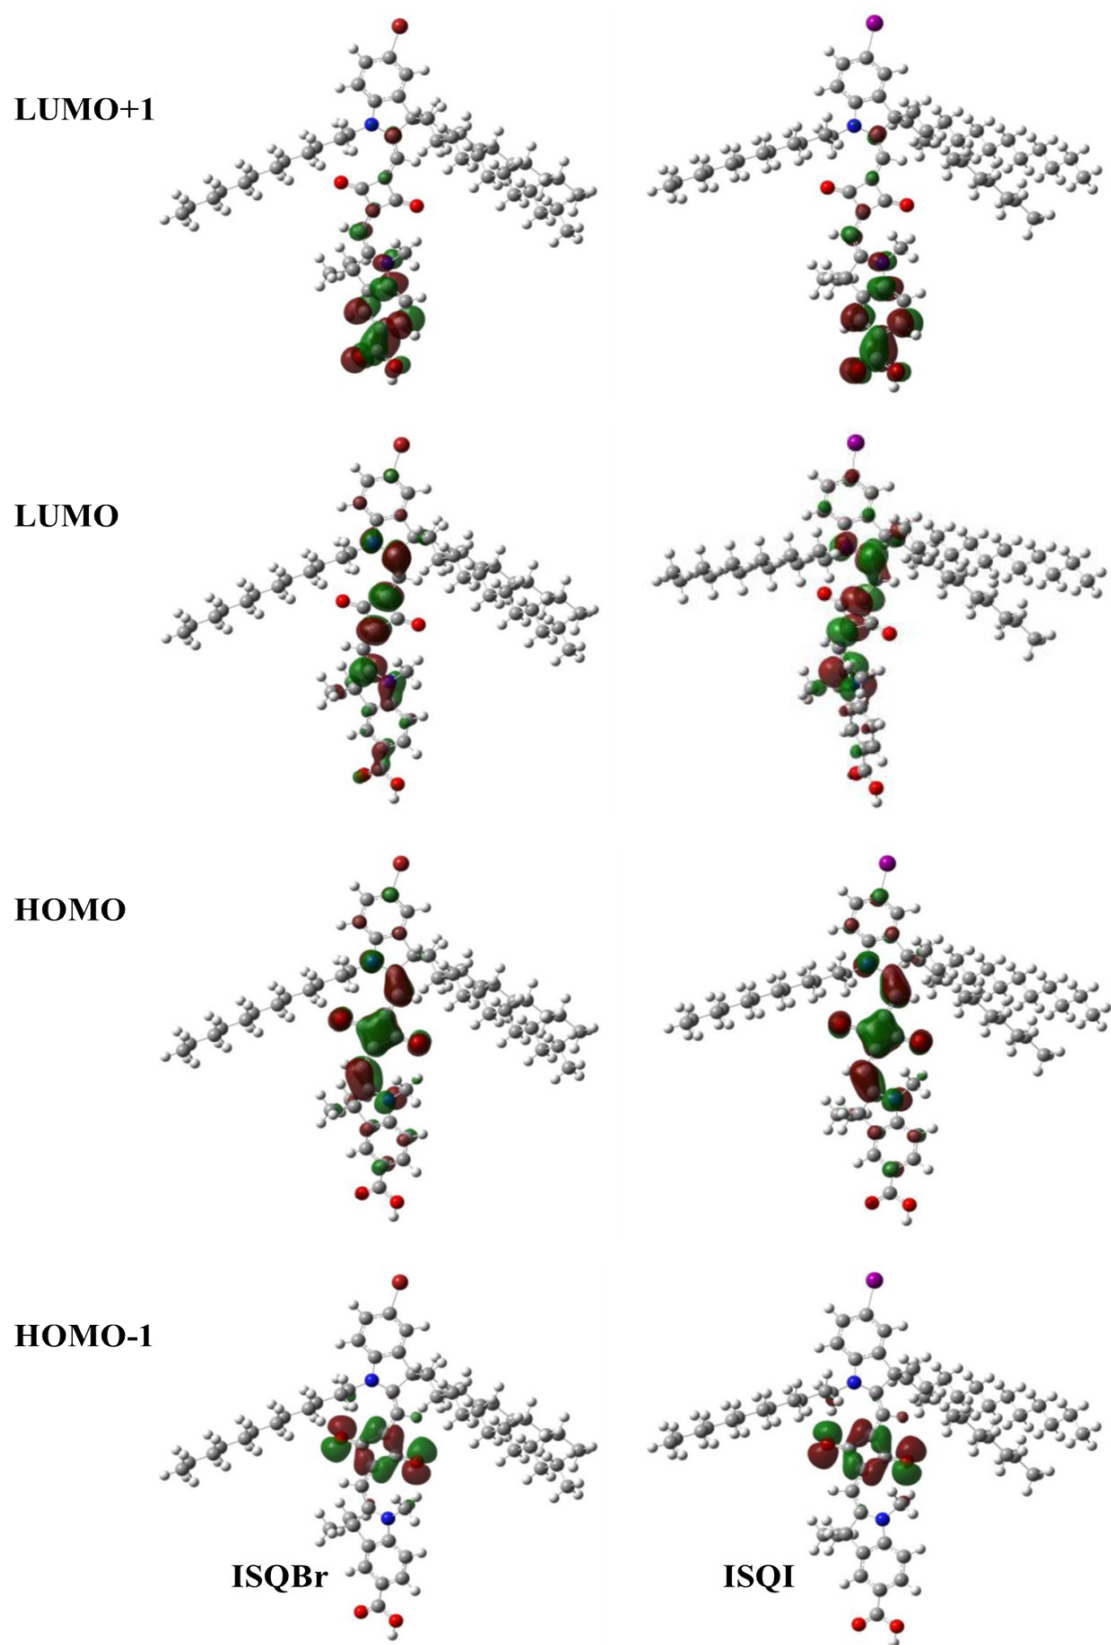

**Figure**

**re S14.** The calculated energy levels (HOMO, HOMO-1, LUMO, LUMO+1) of **ISQBr** and **ISQI** dyes.

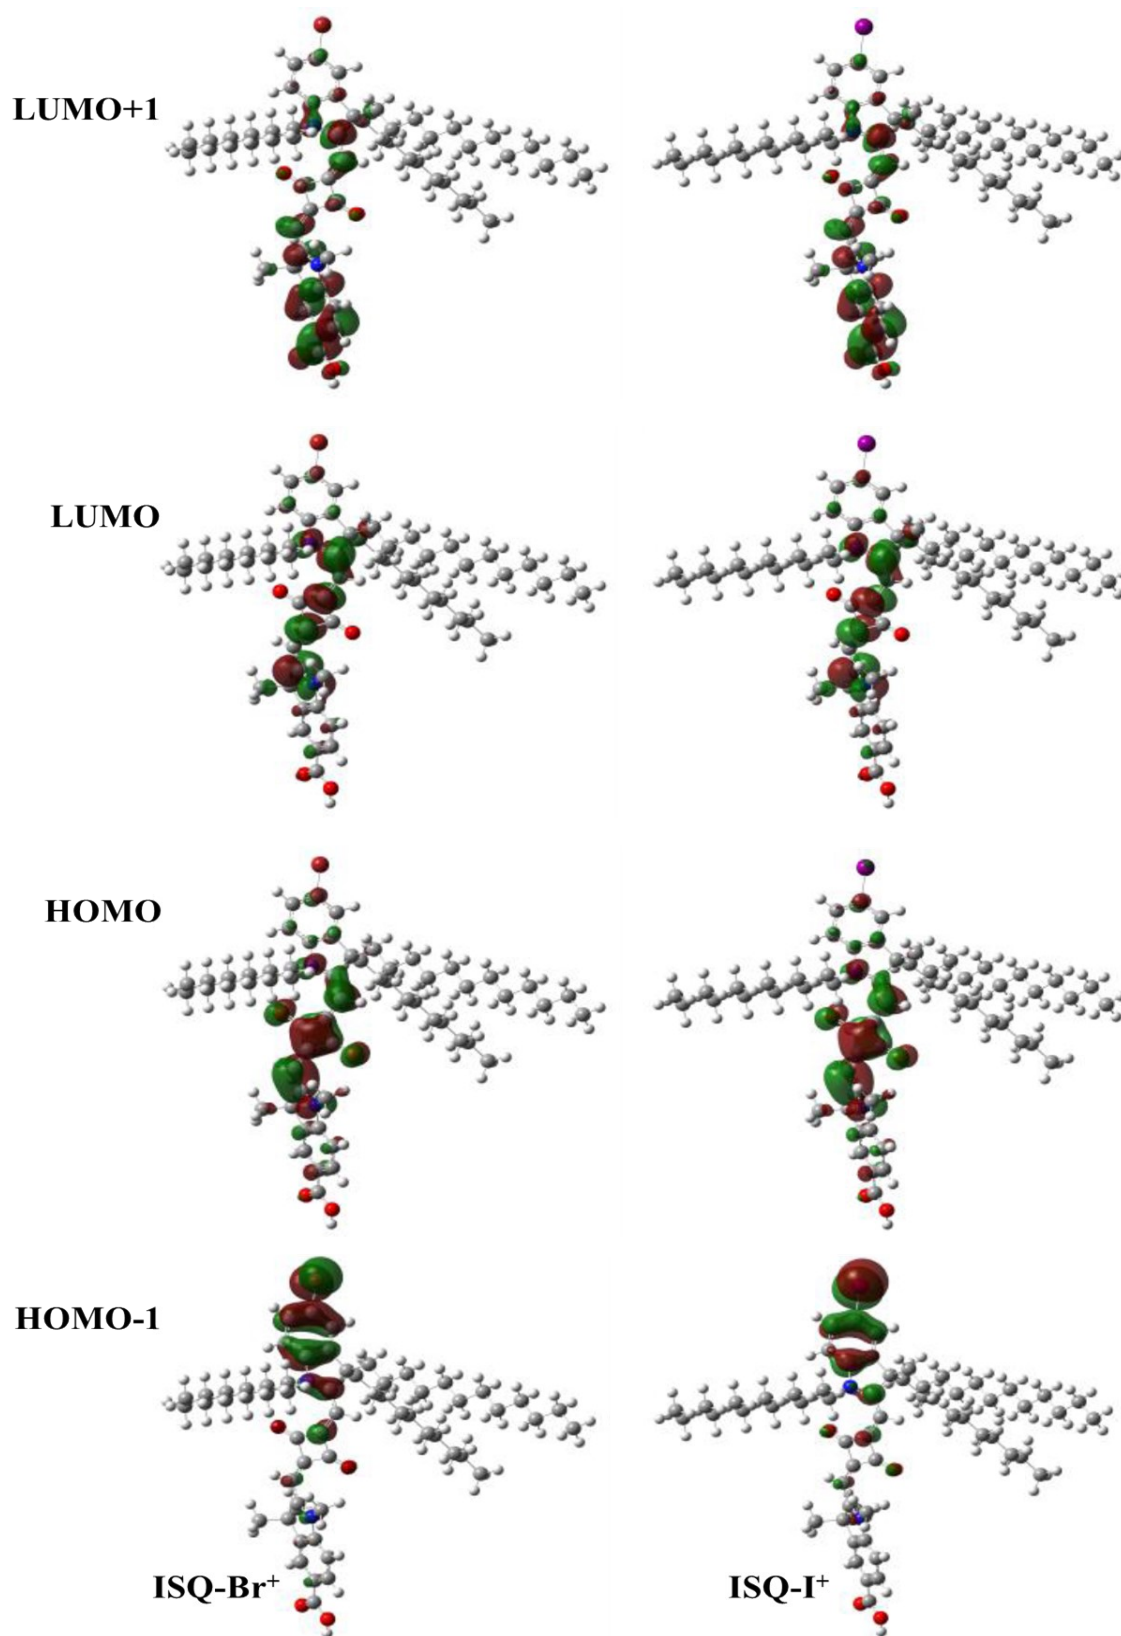

**Figure S15.** The calculated energy levels (HOMO, HOMO-1, LUMO, LUMO+1) oxidized dyes of **ISQ-Br<sup>+</sup>** and **ISQ-I<sup>+</sup>** dyes.



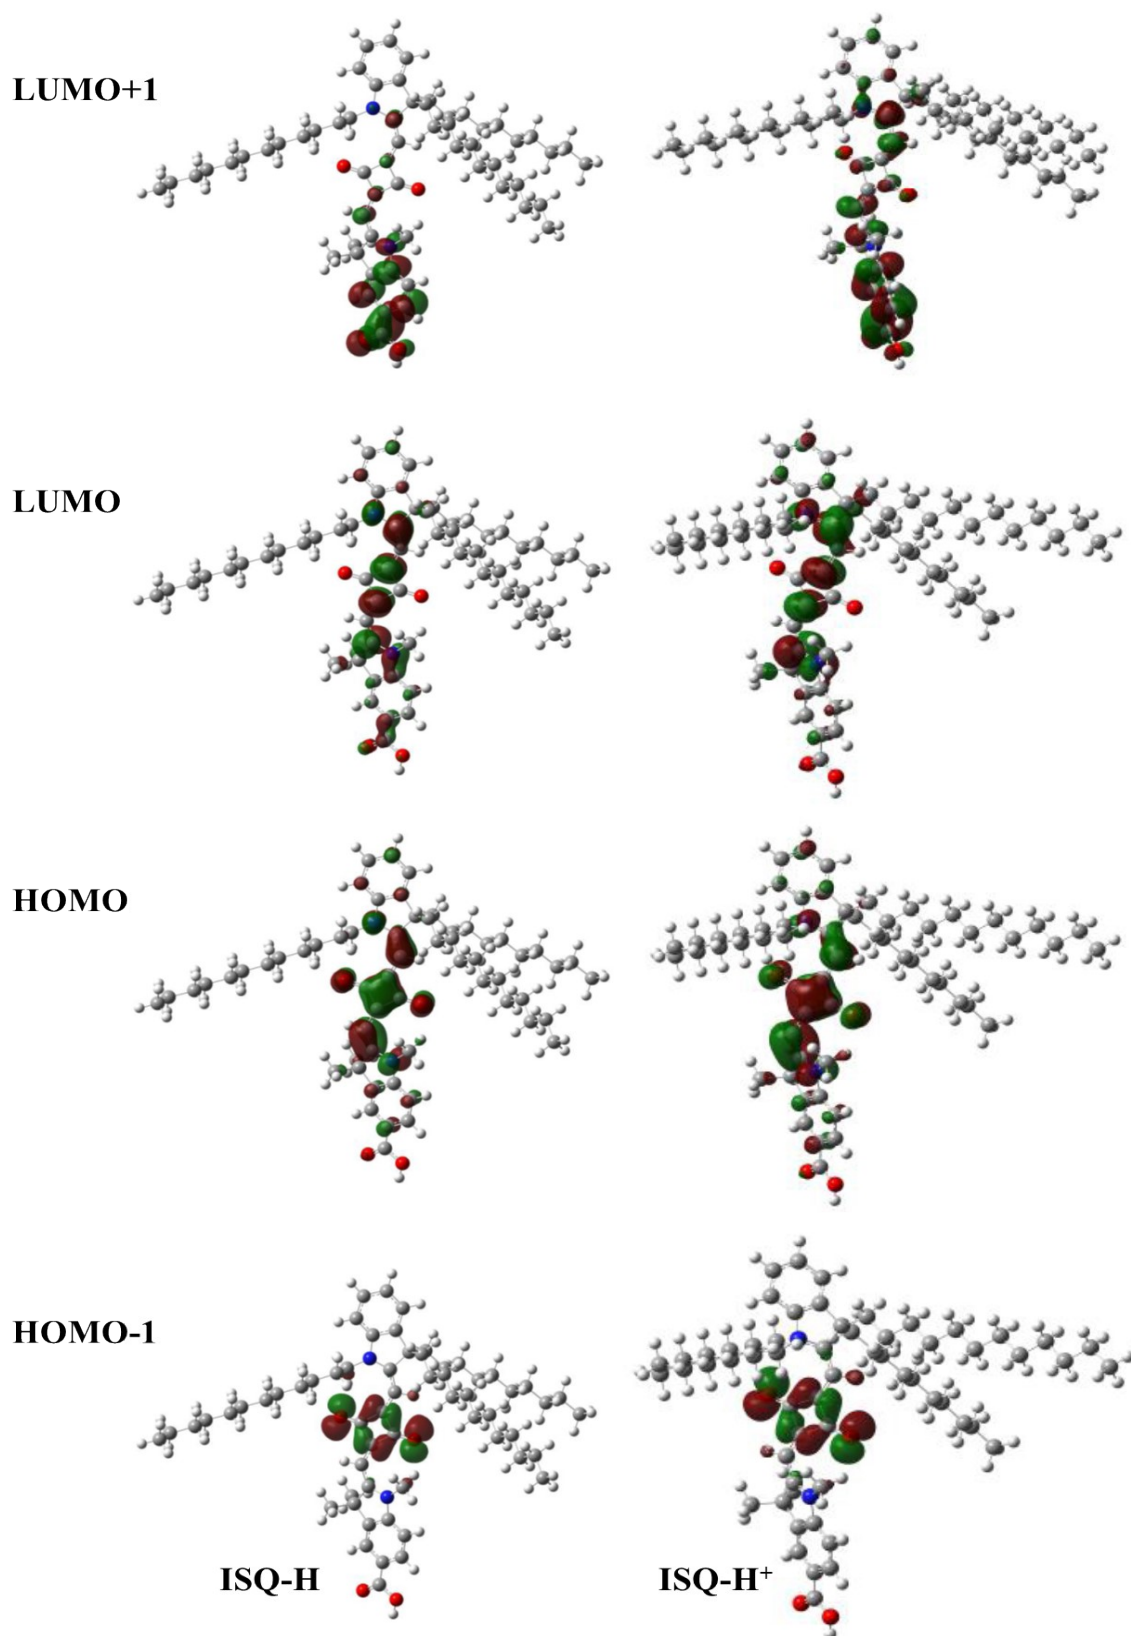

**Figure S16.** The calculated energy levels (HOMO, HOMO-1, LUMO, LUMO+1) neutral and oxidized of SQS4 or ISQ-H dyes.



**Table S4.** Computed frontier molecular orbital energies, energy gap and partial charges of ISQ dyes with SQS4 dye for neutral and positively charged species.

| Dye                    | HOMO (eV) |         | LUMO (eV) |         | HOMO - LUMO (eV) |         |
|------------------------|-----------|---------|-----------|---------|------------------|---------|
|                        | Neutral   | Charged | Neutral   | Charged | Neutral          | Charged |
| <b>ISQH<br/>(SQS4)</b> | -4.99     | -8.03   | -2.27     | -5.71   | 2.72             | 2.32    |
| <b>ISQF</b>            | -5.09     | -8.12   | -2.37     | -5.81   | 2.72             | 2.31    |
| <b>ISQCl</b>           | -5.11     | -8.12   | -2.39     | -5.82   | 2.72             | 2.30    |
| <b>ISQBr</b>           | -5.09     | -8.09   | -2.37     | -5.79   | 2.72             | 2.30    |
| <b>ISQI</b>            | -5.08     | -8.06   | -2.36     | -5.76   | 2.72             | 2.30    |

**Table S5.** Computed frontier molecular orbital energy levels (HOMO-1, LUMO+1) of neutral and positively charged of ISQ dyes with SQS4 dye.

| Dye                    | HOMO-1 (eV) |         | HOMO (eV) |         | LUMO (eV) |         | LUMO+1 (eV) |         |
|------------------------|-------------|---------|-----------|---------|-----------|---------|-------------|---------|
|                        | Neutral     | Charged | Neutral   | Charged | Neutral   | Charged | Neutral     | Charged |
| <b>ISQH<br/>(SQS4)</b> | -6.17       | -9.36   | -4.99     | -8.03   | -2.27     | -5.71   | -1.11       | -4.26   |
| <b>ISQF</b>            | -6.27       | -9.43   | -5.09     | -8.12   | -2.37     | -5.81   | -1.18       | -4.34   |
| <b>ISQCl</b>           | -6.28       | -9.41   | -5.11     | -8.12   | -2.39     | -5.82   | -1.19       | -4.33   |
| <b>ISQBr</b>           | -6.26       | -9.25   | -5.09     | -8.09   | -2.37     | -5.79   | -1.18       | -4.32   |
| <b>ISQI</b>            | -6.25       | -8.95   | -5.08     | -8.06   | -2.36     | -5.76   | -1.17       | -4.30   |

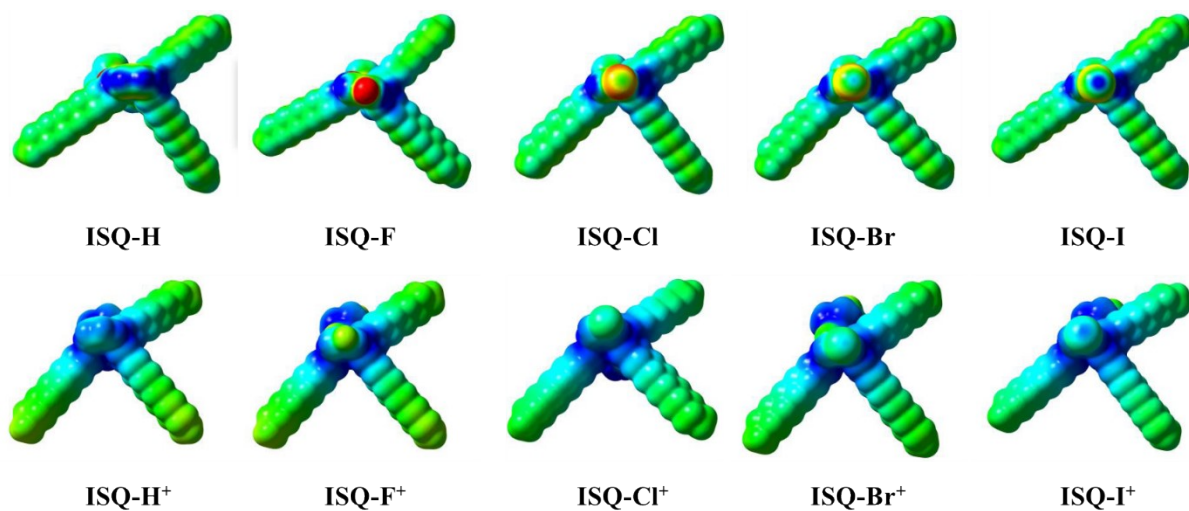

**Figure S17.** Molecular Electrostatic potential (MEP) mapped onto the van der waals surface top view of **ISQ-X** and **ISQ-X<sup>+</sup>** dyes. Color coding ( 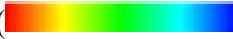 ) red to blue is (-0.02 to +0.02) kcal/mol.

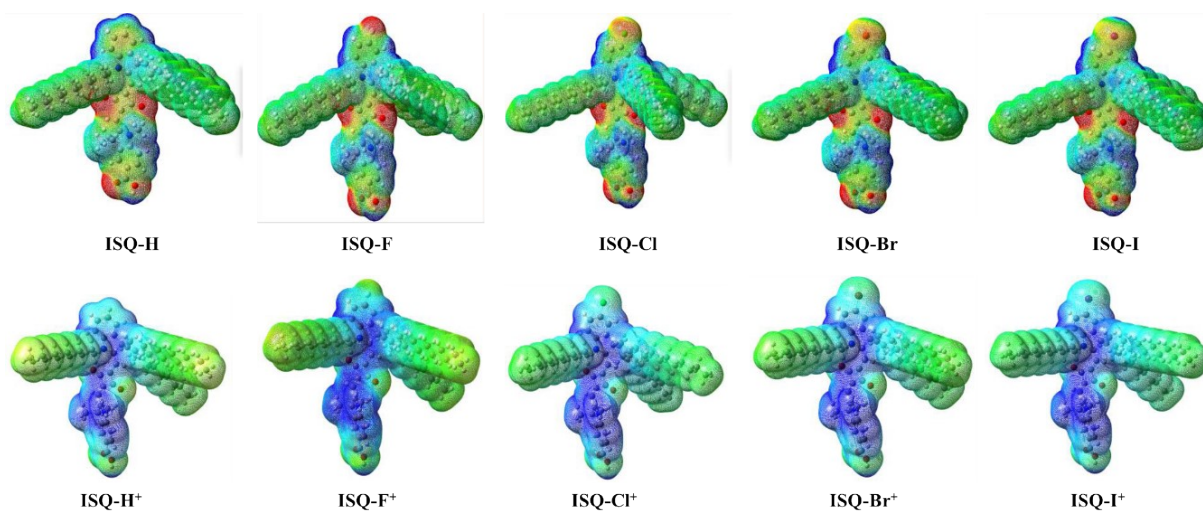

**Figure S18.** Molecular Electrostatic potential (MEP) mapped onto the van der waals surface side view of **ISQ-X** and **ISQ-X<sup>+</sup>** dyes. Color coding (  ) red to blue is (-0.02 to +0.02) kcal/mol.

### DSSC device performance.

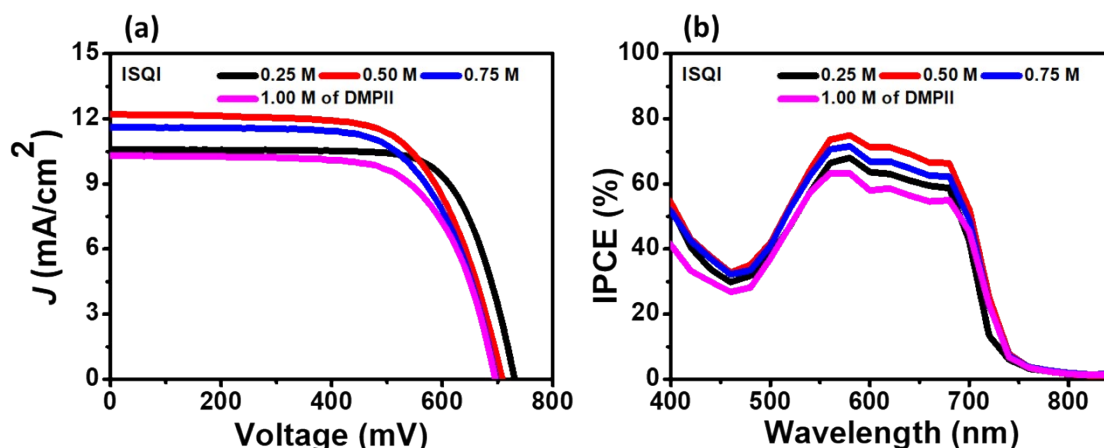

**Figure S19.** (a) and (b)  $I$ - $V$  and IPCE curves of ISQI dye with different concentration of electrolytes.

**Table S6.** DSSC device performance of ISQI dye with different concentration of electrolytes.

| $I/I_3^-$ | CDCA (mM) | $V_{oc}$ (mV) | $J_{sc}$ (mA/cm <sup>2</sup> ) | $ff$ (%)  | $\eta$ (%)  |
|-----------|-----------|---------------|--------------------------------|-----------|-------------|
| A         | 0.3       | 733 ± 1       | 10.61 ± 0.10                   | 73 ± 0.88 | 5.67 ± 0.12 |
| B         | 0.3       | 709 ± 2       | 12.21 ± 0.07                   | 68 ± 0.50 | 5.81 ± 0.10 |
| C         | 0.3       | 698 ± 1       | 11.62 ± 0.09                   | 68 ± 1.00 | 5.51 ± 0.11 |
| D         | 0.3       | 697 ± 1       | 10.31 ± 0.12                   | 69 ± 0.77 | 4.96 ± 0.14 |

A = 0.25 M DMPII, 15 mM I<sub>2</sub>, 0.125 M NaI, 0.5 M TBP, 0.1 M GuSCN,

B = 0.50 M DMPII, 30 mM I<sub>2</sub>, 0.250 M NaI, 0.5 M TBP, 0.1 M GuSCN,

C = 0.75 M DMPII, 45 mM I<sub>2</sub>, 0.375 M NaI, 0.5 M TBP, 0.1 M GuSCN, and

D = 1.00 M DMPII, 60 mM I<sub>2</sub>, 0.500 M NaI, 0.5 M TBP, 0.1 M GuSCN in acetonitrile and valeronitrile (85:15, v/v).

Where, DMPII = 1,2-dimethyl-3-propylimidazolium iodide, TBP = 4-*tert*-Butylpyridine, and

GuSCN = guanidinium thiocyanate.

**Dye desorption studies of ISQ dyes.** ISQ dyes were desorbed from the TiO<sub>2</sub> surface by using 1 M of HCl in EtOH solution 2 mL (Table S7). The cuvette's path length was 0.1 cm<sup>2</sup>, area of the photoanode was 0.23 cm<sup>2</sup> and 6 μm thick (Conditions for sensitization: sensitization time 12 h, [dye] = 0.1 mM in MeCN:CHCl<sub>3</sub> (95%:5%).

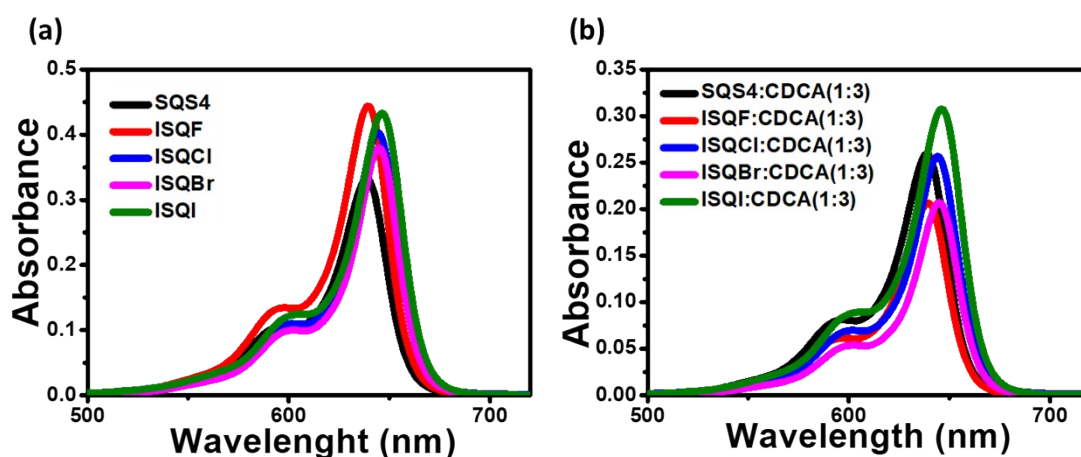

**Figure S20.** UV-vis absorption spectra of desorbed dyes with and without CDCA (ISQ and SQS4).

**Table S7.** Dye loading studies (ISQ and SQS4).

| Dyes  | CDCA | $\epsilon$ (M <sup>-1</sup> cm <sup>-1</sup> ) | Dye Loading on TiO <sub>2</sub><br>(mol/cm <sup>2</sup> ) |
|-------|------|------------------------------------------------|-----------------------------------------------------------|
| SQS4  | 0    | $2.4 \times 10^5$                              | $1.13 \pm 0.25 \times 10^{-8}$                            |
|       | 3    | $2.4 \times 10^5$                              | $9.04 \pm 0.2 \times 10^{-9}$                             |
| ISQF  | 0    | $2.1 \times 10^5$                              | $1.35 \pm 0.4 \times 10^{-8}$                             |
|       | 3    | $2.1 \times 10^5$                              | $8.1 \pm 0.1 \times 10^{-9}$                              |
| ISQCl | 0    | $2.5 \times 10^5$                              | $1.1 \pm 0.2 \times 10^{-8}$                              |
|       | 3    | $2.5 \times 10^5$                              | $8.6 \pm 0.2 \times 10^{-9}$                              |
| ISQBr | 0    | $2.2 \times 10^5$                              | $1.3 \pm 0.2 \times 10^{-8}$                              |
|       | 3    | $2.2 \times 10^5$                              | $8.0 \pm 0.1 \times 10^{-9}$                              |
| ISQI  | 0    | $3.1 \times 10^5$                              | $1.2 \pm 0.1 \times 10^{-8}$                              |
|       | 3    | $3.1 \times 10^5$                              | $8.31 \pm 0.3 \times 10^{-9}$                             |

## Electrochemical Impedance Spectroscopy (EIS).

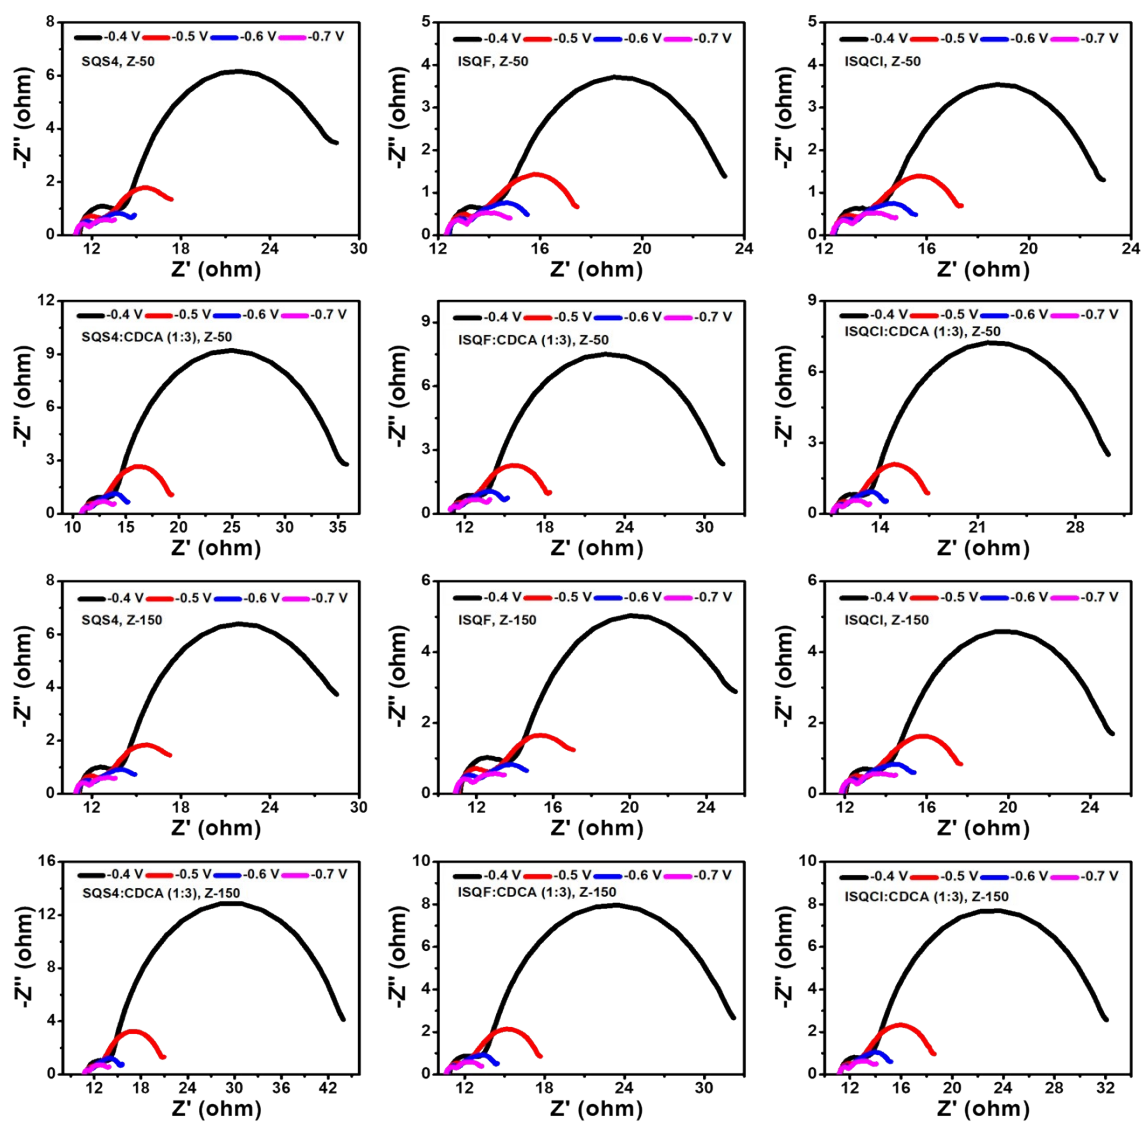

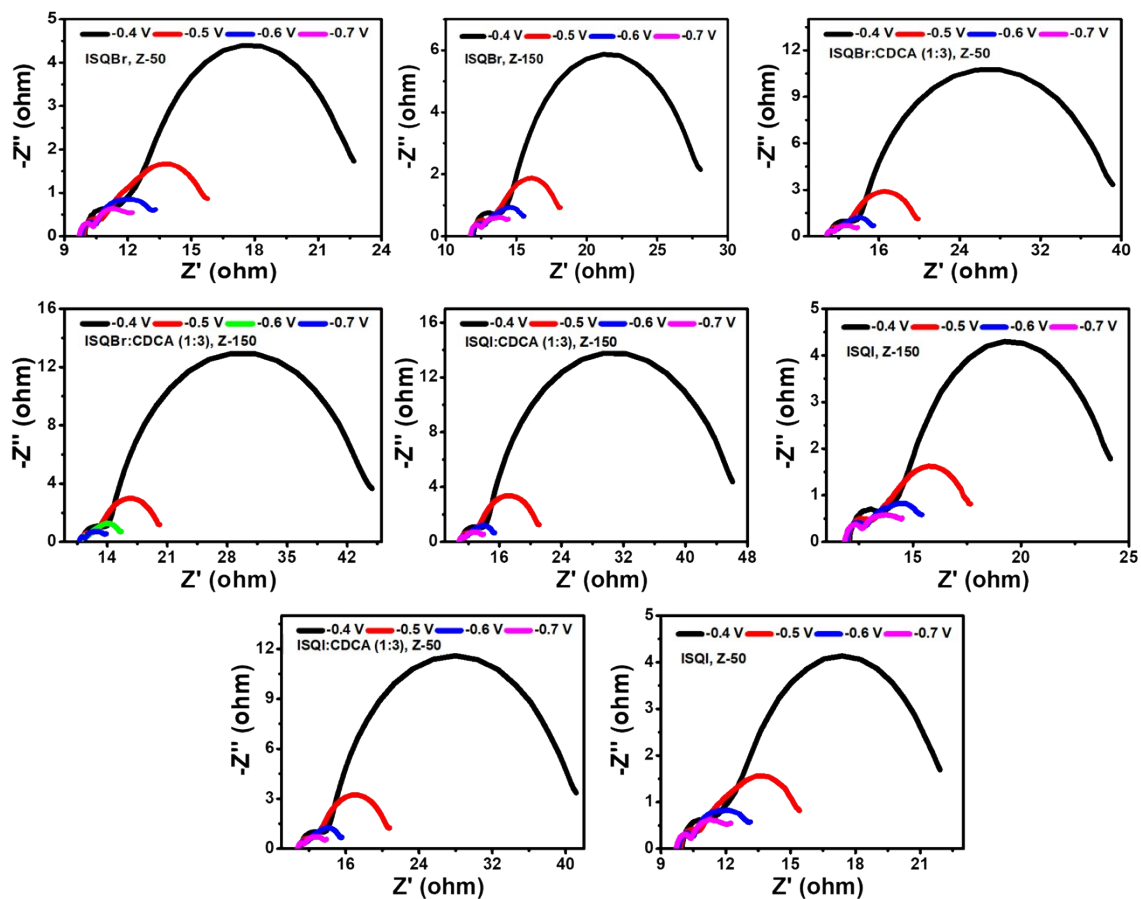

Figure S21. Nyquist plots of SQS4 and ISQ dyes.

## Coordinates of optimized neutral ISQ-X dyes

### ISQF

C 0.500000 -4.642000 -2.796000  
C -0.843000 -4.878000 -2.482000  
C -1.416000 -6.115000 -2.746000  
C -0.597000 -7.083000 -3.321000  
C 0.737000 -6.875000 -3.634000  
C 1.310000 -5.624000 -3.367000  
H -2.449000 -6.343000 -2.527000  
H 1.317000 -7.673000 -4.074000  
H 2.349000 -5.446000 -3.599000  
C -0.233000 -2.660000 -1.882000  
C -0.308000 -1.389000 -1.317000  
H -1.271000 -1.195000 -0.865000  
C 0.517000 -0.275000 -1.169000  
C 1.784000 0.399000 -1.551000  
O 2.795000 0.129000 -2.247000  
C 1.397000 1.601000 -0.794000  
C 0.117000 0.950000 -0.439000  
C 2.092000 2.819000 -0.795000  
C 1.928000 4.037000 -0.164000  
H 2.920000 2.802000 -1.499000  
O -0.931000 1.240000 0.189000  
C 2.137000 6.348000 0.348000  
C 1.227000 5.731000 1.224000  
C 0.558000 6.453000 2.216000

|   |           |           |           |
|---|-----------|-----------|-----------|
| H | -0.156000 | 5.988000  | 2.880000  |
| C | 1.738000  | 8.449000  | 1.456000  |
| C | 2.031000  | 9.883000  | 1.552000  |
| O | 2.819000  | 10.509000 | 0.829000  |
| N | 1.139000  | 4.359000  | 0.921000  |
| C | 2.358000  | 5.655000  | -2.085000 |
| H | 1.284000  | 5.780000  | -2.224000 |
| H | 2.852000  | 6.587000  | -2.367000 |
| H | 2.703000  | 4.867000  | -2.755000 |
| C | 0.407000  | 3.393000  | 1.743000  |
| H | 0.139000  | 3.861000  | 2.686000  |
| H | -0.481000 | 3.020000  | 1.238000  |
| H | 1.053000  | 2.539000  | 1.950000  |
| C | 0.825000  | 7.819000  | 2.321000  |
| H | 0.324000  | 8.409000  | 3.073000  |
| C | 2.400000  | 7.698000  | 0.459000  |
| H | 3.098000  | 8.203000  | -0.194000 |
| C | 2.690000  | 5.305000  | -0.613000 |
| C | 4.221000  | 5.130000  | -0.433000 |
| H | 4.468000  | 4.877000  | 0.599000  |
| H | 4.599000  | 4.338000  | -1.083000 |
| H | 4.733000  | 6.058000  | -0.692000 |
| C | -4.235000 | -1.470000 | -3.875000 |
| H | -3.906000 | -1.777000 | -4.875000 |
| H | -5.074000 | -2.126000 | -3.613000 |
| C | -4.727000 | -0.013000 | -3.929000 |



H -5.066000 0.291000 -2.932000  
H -3.884000 0.642000 -4.177000  
C -5.860000 0.213000 -4.944000  
H -5.517000 -0.089000 -5.941000  
H -6.704000 -0.444000 -4.698000  
C -6.351000 1.670000 -4.998000  
H -6.707000 1.968000 -4.004000  
H -5.504000 2.327000 -5.228000  
C -7.468000 1.905000 -6.029000  
H -7.110000 1.608000 -7.022000  
H -8.316000 1.248000 -5.800000  
O 1.329000 10.524000 2.561000  
H 1.562000 11.472000 2.579000  
C -1.460000 -3.611000 -1.895000  
C -1.988000 -3.953000 -0.452000  
H -2.488000 -4.923000 -0.535000  
H -1.113000 -4.122000 0.184000  
C -2.592000 -3.141000 -2.888000  
H -3.443000 -3.810000 -2.719000  
H -2.239000 -3.359000 -3.901000  
C -3.083000 -1.682000 -2.873000  
H -2.260000 -1.013000 -3.135000  
H -3.418000 -1.381000 -1.880000  
C -2.960000 -3.003000 0.271000  
H -2.535000 -2.004000 0.389000  
H -3.877000 -2.891000 -0.314000

|   |           |           |           |
|---|-----------|-----------|-----------|
| C | -3.330000 | -3.540000 | 1.668000  |
| H | -2.418000 | -3.636000 | 2.270000  |
| H | -3.744000 | -4.551000 | 1.573000  |
| C | -4.336000 | -2.646000 | 2.412000  |
| H | -3.925000 | -1.633000 | 2.496000  |
| H | -5.251000 | -2.556000 | 1.813000  |
| C | -4.698000 | -3.166000 | 3.813000  |
| H | -3.784000 | -3.250000 | 4.414000  |
| H | -5.103000 | -4.182000 | 3.729000  |
| C | -5.711000 | -2.277000 | 4.555000  |
| H | -5.306000 | -1.261000 | 4.638000  |
| H | -6.625000 | -2.193000 | 3.954000  |
| C | -6.073000 | -2.795000 | 5.957000  |
| H | -5.159000 | -2.876000 | 6.559000  |
| H | -6.475000 | -3.811000 | 5.874000  |
| C | -7.088000 | -1.907000 | 6.697000  |
| H | -6.686000 | -0.891000 | 6.781000  |
| H | -8.002000 | -1.826000 | 6.095000  |
| C | -7.451000 | -2.425000 | 8.099000  |
| H | -7.852000 | -3.442000 | 8.016000  |
| H | -6.537000 | -2.505000 | 8.702000  |
| C | -8.468000 | -1.539000 | 8.839000  |
| H | -8.067000 | -0.521000 | 8.923000  |
| H | -9.382000 | -1.459000 | 8.238000  |
| C | -8.830000 | -2.056000 | 10.242000 |
| H | -7.916000 | -2.135000 | 10.843000 |

H -9.229000 -3.074000 10.158000  
C -9.847000 -1.167000 10.973000  
H -10.082000 -1.560000 11.964000  
H -9.462000 -0.151000 11.101000  
H -10.783000 -1.097000 10.412000  
C -7.957000 3.362000 -6.082000  
H -8.324000 3.658000 -5.092000  
H -7.108000 4.021000 -6.303000  
C -9.065000 3.603000 -7.122000  
H -8.699000 3.308000 -8.112000  
H -9.913000 2.944000 -6.903000  
N 0.837000 -3.310000 -2.444000  
C 2.213000 -2.812000 -2.596000  
H 2.620000 -3.267000 -3.502000  
H 2.206000 -1.738000 -2.763000  
C 3.104000 -3.142000 -1.384000  
H 2.725000 -2.602000 -0.511000  
H 3.037000 -4.210000 -1.151000  
C 4.570000 -2.749000 -1.634000  
H 4.970000 -3.345000 -2.464000  
H 4.603000 -1.703000 -1.952000  
C 5.463000 -2.938000 -0.396000  
H 5.073000 -2.322000 0.422000  
H 5.404000 -3.979000 -0.053000  
C 6.936000 -2.570000 -0.647000  
H 6.988000 -1.543000 -1.026000

|   |            |           |           |
|---|------------|-----------|-----------|
| H | 7.339000   | -3.211000 | -1.441000 |
| C | 7.821000   | -2.694000 | 0.605000  |
| H | 7.419000   | -2.047000 | 1.394000  |
| H | 7.764000   | -3.719000 | 0.991000  |
| C | 9.294000   | -2.328000 | 0.354000  |
| H | 9.348000   | -1.310000 | -0.051000 |
| H | 9.704000   | -2.988000 | -0.421000 |
| C | 10.174000  | -2.418000 | 1.613000  |
| H | 9.764000   | -1.757000 | 2.386000  |
| H | 10.119000  | -3.435000 | 2.020000  |
| C | 11.646000  | -2.051000 | 1.362000  |
| H | 11.699000  | -1.038000 | 0.945000  |
| H | 12.060000  | -2.719000 | 0.597000  |
| C | 12.522000  | -2.124000 | 2.624000  |
| H | 12.110000  | -1.456000 | 3.390000  |
| H | 12.471000  | -3.137000 | 3.043000  |
| C | 13.995000  | -1.756000 | 2.374000  |
| H | 14.046000  | -0.746000 | 1.952000  |
| H | 14.409000  | -2.426000 | 1.612000  |
| C | 14.861000  | -1.826000 | 3.641000  |
| H | 15.900000  | -1.559000 | 3.430000  |
| H | 14.491000  | -1.140000 | 4.409000  |
| H | 14.856000  | -2.833000 | 4.067000  |
| C | -9.548000  | 5.060000  | -7.168000 |
| H | -10.332000 | 5.198000  | -7.916000 |
| H | -9.951000  | 5.372000  | -6.201000 |

H -8.727000 5.739000 -7.418000

F -1.158000 -8.346000 -3.595000

### ISQCI

C 0.365000 -4.149000 -3.294000

C -0.931000 -4.492000 -2.896000

C -1.455000 -5.738000 -3.214000

C -0.646000 -6.616000 -3.939000

C 0.645000 -6.288000 -4.338000

C 1.172000 -5.031000 -4.012000

H -2.451000 -6.032000 -2.918000

H 1.238000 -6.999000 -4.895000

H 2.176000 -4.774000 -4.315000

C -0.407000 -2.282000 -2.191000

C -0.576000 -1.002000 -1.671000

H -1.530000 -0.882000 -1.176000

C 0.133000 0.198000 -1.619000

C 1.352000 0.951000 -2.010000

O 2.410000 0.722000 -2.647000

C 0.838000 2.164000 -1.353000

C -0.393000 1.429000 -0.985000

C 1.430000 3.434000 -1.417000

C 1.142000 4.671000 -0.873000

H 2.280000 3.442000 -2.094000

O -1.481000 1.669000 -0.407000

C 1.134000 7.019000 -0.511000

|   |           |           |           |
|---|-----------|-----------|-----------|
| C | 0.252000  | 6.381000  | 0.380000  |
| C | -0.508000 | 7.103000  | 1.303000  |
| H | -1.201000 | 6.620000  | 1.976000  |
| C | 0.520000  | 9.142000  | 0.446000  |
| C | 0.688000  | 10.600000 | 0.455000  |
| O | 1.442000  | 11.245000 | -0.286000 |
| N | 0.295000  | 4.990000  | 0.167000  |
| C | 1.496000  | 6.194000  | -2.886000 |
| H | 0.420000  | 6.214000  | -3.064000 |
| H | 1.917000  | 7.146000  | -3.215000 |
| H | 1.930000  | 5.398000  | -3.492000 |
| C | -0.371000 | 4.019000  | 1.038000  |
| H | -0.676000 | 4.516000  | 1.955000  |
| H | -1.226000 | 3.556000  | 0.552000  |
| H | 0.334000  | 3.226000  | 1.290000  |
| C | -0.362000 | 8.491000  | 1.325000  |
| H | -0.937000 | 9.081000  | 2.023000  |
| C | 1.276000  | 8.391000  | -0.482000 |
| H | 1.949000  | 8.913000  | -1.148000 |
| C | 1.806000  | 5.970000  | -1.385000 |
| C | 3.339000  | 5.942000  | -1.151000 |
| H | 3.573000  | 5.782000  | -0.098000 |
| H | 3.805000  | 5.145000  | -1.733000 |
| H | 3.778000  | 6.892000  | -1.460000 |
| C | -5.103000 | -1.693000 | -2.927000 |
| H | -4.772000 | -1.144000 | -3.816000 |

H -5.542000 -2.631000 -3.291000  
C -6.185000 -0.877000 -2.200000  
H -6.533000 -1.439000 -1.324000  
H -5.742000 0.048000 -1.814000  
C -7.391000 -0.532000 -3.091000  
H -7.046000 0.053000 -3.952000  
H -7.815000 -1.457000 -3.499000  
C -8.494000 0.248000 -2.357000  
H -8.848000 -0.343000 -1.504000  
H -8.069000 1.167000 -1.936000  
C -9.691000 0.608000 -3.253000  
H -9.340000 1.213000 -4.098000  
H -10.107000 -0.310000 -3.687000  
O -0.097000 11.240000 1.402000  
H 0.053000 12.204000 1.364000  
C -1.535000 -3.345000 -2.089000  
C -1.748000 -3.884000 -0.620000  
H -2.646000 -4.511000 -0.655000  
H -0.918000 -4.564000 -0.405000  
C -2.868000 -2.894000 -2.791000  
H -3.390000 -3.814000 -3.072000  
H -2.593000 -2.408000 -3.733000  
C -3.881000 -2.009000 -2.043000  
H -3.434000 -1.066000 -1.725000  
H -4.224000 -2.520000 -1.139000  
C -1.858000 -2.905000 0.564000

|   |           |           |           |
|---|-----------|-----------|-----------|
| H | -0.920000 | -2.358000 | 0.679000  |
| H | -2.632000 | -2.155000 | 0.396000  |
| C | -2.166000 | -3.651000 | 1.877000  |
| H | -1.409000 | -4.428000 | 2.041000  |
| H | -3.126000 | -4.175000 | 1.782000  |
| C | -2.214000 | -2.722000 | 3.102000  |
| H | -1.251000 | -2.209000 | 3.202000  |
| H | -2.961000 | -1.938000 | 2.932000  |
| C | -2.536000 | -3.457000 | 4.415000  |
| H | -1.792000 | -4.245000 | 4.580000  |
| H | -3.504000 | -3.964000 | 4.317000  |
| C | -2.572000 | -2.530000 | 5.642000  |
| H | -1.604000 | -2.023000 | 5.740000  |
| H | -3.315000 | -1.740000 | 5.476000  |
| C | -2.895000 | -3.262000 | 6.956000  |
| H | -2.153000 | -4.053000 | 7.119000  |
| H | -3.864000 | -3.766000 | 6.860000  |
| C | -2.925000 | -2.336000 | 8.184000  |
| H | -1.956000 | -1.831000 | 8.279000  |
| H | -3.667000 | -1.545000 | 8.021000  |
| C | -3.245000 | -3.068000 | 9.498000  |
| H | -4.214000 | -3.572000 | 9.404000  |
| H | -2.503000 | -3.860000 | 9.660000  |
| C | -3.272000 | -2.144000 | 10.727000 |
| H | -2.304000 | -1.638000 | 10.822000 |
| H | -4.015000 | -1.352000 | 10.568000 |



C -3.589000 -2.876000 12.042000  
H -2.846000 -3.667000 12.201000  
H -4.557000 -3.381000 11.948000  
C -3.613000 -1.945000 13.264000  
H -3.841000 -2.495000 14.180000  
H -2.647000 -1.453000 13.403000  
H -4.370000 -1.164000 13.148000  
C -10.807000 1.367000 -2.515000  
H -11.162000 0.760000 -1.674000  
H -10.393000 2.284000 -2.078000  
C -12.002000 1.732000 -3.413000  
H -11.649000 2.344000 -4.251000  
H -12.412000 0.817000 -3.855000  
N 0.658000 -2.832000 -2.864000  
C 1.980000 -2.233000 -3.105000  
H 2.325000 -2.590000 -4.077000  
H 1.896000 -1.153000 -3.180000  
C 2.995000 -2.596000 -2.005000  
H 2.647000 -2.177000 -1.056000  
H 3.032000 -3.683000 -1.877000  
C 4.400000 -2.055000 -2.318000  
H 4.759000 -2.492000 -3.259000  
H 4.332000 -0.976000 -2.478000  
C 5.417000 -2.354000 -1.203000  
H 5.050000 -1.927000 -0.261000  
H 5.481000 -3.437000 -1.044000

|   |            |           |           |
|---|------------|-----------|-----------|
| C | 6.822000   | -1.800000 | -1.492000 |
| H | 6.755000   | -0.717000 | -1.647000 |
| H | 7.192000   | -2.222000 | -2.434000 |
| C | 7.837000   | -2.091000 | -0.373000 |
| H | 7.457000   | -1.682000 | 0.572000  |
| H | 7.913000   | -3.176000 | -0.227000 |
| C | 9.237000   | -1.517000 | -0.645000 |
| H | 9.160000   | -0.432000 | -0.786000 |
| H | 9.617000   | -1.921000 | -1.591000 |
| C | 10.250000  | -1.811000 | 0.475000  |
| H | 9.865000   | -1.416000 | 1.422000  |
| H | 10.336000  | -2.896000 | 0.609000  |
| C | 11.647000  | -1.222000 | 0.212000  |
| H | 11.561000  | -0.137000 | 0.080000  |
| H | 12.033000  | -1.616000 | -0.736000 |
| C | 12.660000  | -1.516000 | 1.332000  |
| H | 12.273000  | -1.125000 | 2.281000  |
| H | 12.750000  | -2.601000 | 1.463000  |
| C | 14.055000  | -0.922000 | 1.073000  |
| H | 13.965000  | 0.162000  | 0.941000  |
| H | 14.442000  | -1.314000 | 0.126000  |
| C | 15.059000  | -1.218000 | 2.197000  |
| H | 16.038000  | -0.784000 | 1.982000  |
| H | 14.715000  | -0.808000 | 3.151000  |
| H | 15.196000  | -2.295000 | 2.331000  |
| C | -13.115000 | 2.482000  | -2.665000 |

H -13.949000 2.724000 -3.328000  
H -13.509000 1.880000 -1.841000  
H -12.743000 3.419000 -2.242000  
Cl -1.314000 -8.263000 -4.375000

**ISQBr**

C 0.237000 -4.372000 -2.535000  
C -1.085000 -4.559000 -2.118000  
C -1.697000 -5.796000 -2.265000  
C -0.952000 -6.833000 -2.839000  
C 0.365000 -6.656000 -3.253000  
C 0.982000 -5.406000 -3.100000  
H -2.716000 -5.966000 -1.950000  
H 0.914000 -7.477000 -3.689000  
H 2.006000 -5.272000 -3.417000  
C -0.402000 -2.317000 -1.717000  
C -0.465000 -0.971000 -1.365000  
H -1.394000 -0.715000 -0.873000  
C 0.330000 0.168000 -1.490000  
C 1.570000 0.774000 -2.040000  
O 2.574000 0.388000 -2.690000  
C 1.172000 2.097000 -1.535000  
C -0.079000 1.508000 -1.008000  
C 1.832000 3.303000 -1.813000  
C 1.648000 4.622000 -1.444000  
H 2.640000 3.157000 -2.526000

|   |           |           |           |
|---|-----------|-----------|-----------|
| O | -1.114000 | 1.902000  | -0.418000 |
| C | 1.789000  | 6.993000  | -1.439000 |
| C | 0.932000  | 6.549000  | -0.416000 |
| C | 0.273000  | 7.445000  | 0.430000  |
| H | -0.398000 | 7.110000  | 1.206000  |
| C | 1.350000  | 9.268000  | -0.781000 |
| C | 1.592000  | 10.698000 | -1.003000 |
| O | 2.330000  | 11.179000 | -1.875000 |
| N | 0.886000  | 5.143000  | -0.420000 |
| C | 1.961000  | 5.807000  | -3.679000 |
| H | 0.879000  | 5.865000  | -3.802000 |
| H | 2.411000  | 6.673000  | -4.169000 |
| H | 2.316000  | 4.905000  | -4.180000 |
| C | 0.221000  | 4.353000  | 0.620000  |
| H | 0.005000  | 4.996000  | 1.469000  |
| H | -0.690000 | 3.884000  | 0.254000  |
| H | 0.892000  | 3.558000  | 0.946000  |
| C | 0.493000  | 8.809000  | 0.234000  |
| H | -0.003000 | 9.530000  | 0.867000  |
| C | 2.004000  | 8.343000  | -1.626000 |
| H | 2.659000  | 8.719000  | -2.400000 |
| C | 2.349000  | 5.787000  | -2.179000 |
| C | 3.890000  | 5.699000  | -2.023000 |
| H | 4.176000  | 5.676000  | -0.971000 |
| H | 4.277000  | 4.801000  | -2.507000 |
| H | 4.360000  | 6.567000  | -2.488000 |

C -4.972000 -1.417000 -2.732000  
H -4.565000 -1.067000 -3.688000  
H -5.522000 -2.341000 -2.950000  
C -5.944000 -0.364000 -2.174000  
H -6.361000 -0.726000 -1.227000  
H -5.385000 0.548000 -1.932000  
C -7.095000 -0.013000 -3.131000  
H -6.680000 0.365000 -4.073000  
H -7.649000 -0.925000 -3.384000  
C -8.069000 1.027000 -2.552000  
H -8.491000 0.643000 -1.616000  
H -7.512000 1.933000 -2.287000  
C -9.216000 1.400000 -3.508000  
H -8.795000 1.793000 -4.441000  
H -9.771000 0.494000 -3.779000  
O 0.904000 11.518000 -0.122000  
H 1.101000 12.455000 -0.314000  
C -1.613000 -3.266000 -1.503000  
C -1.911000 -3.573000 0.017000  
H -2.843000 -4.150000 0.028000  
H -1.132000 -4.259000 0.364000  
C -2.884000 -2.822000 -2.317000  
H -3.491000 -3.724000 -2.448000  
H -2.546000 -2.541000 -3.319000  
C -3.809000 -1.723000 -1.767000  
H -3.262000 -0.796000 -1.587000

|   |           |           |           |
|---|-----------|-----------|-----------|
| H | -4.227000 | -2.037000 | -0.806000 |
| C | -2.014000 | -2.432000 | 1.046000  |
| H | -1.049000 | -1.928000 | 1.139000  |
| H | -2.729000 | -1.671000 | 0.731000  |
| C | -2.434000 | -2.965000 | 2.429000  |
| H | -1.719000 | -3.728000 | 2.760000  |
| H | -3.404000 | -3.472000 | 2.344000  |
| C | -2.534000 | -1.862000 | 3.497000  |
| H | -1.563000 | -1.360000 | 3.590000  |
| H | -3.241000 | -1.096000 | 3.158000  |
| C | -2.972000 | -2.382000 | 4.876000  |
| H | -2.256000 | -3.137000 | 5.224000  |
| H | -3.936000 | -2.898000 | 4.778000  |
| C | -3.098000 | -1.275000 | 5.936000  |
| H | -2.135000 | -0.760000 | 6.037000  |
| H | -3.813000 | -0.521000 | 5.585000  |
| C | -3.545000 | -1.791000 | 7.315000  |
| H | -2.825000 | -2.537000 | 7.672000  |
| H | -4.503000 | -2.315000 | 7.211000  |
| C | -3.689000 | -0.680000 | 8.369000  |
| H | -2.731000 | -0.155000 | 8.474000  |
| H | -4.408000 | 0.066000  | 8.010000  |
| C | -4.138000 | -1.193000 | 9.748000  |
| H | -5.092000 | -1.723000 | 9.641000  |
| H | -3.416000 | -1.934000 | 10.110000 |
| C | -4.293000 | -0.080000 | 10.798000 |

|   |            |           |           |
|---|------------|-----------|-----------|
| H | -3.340000  | 0.451000  | 10.905000 |
| H | -5.017000  | 0.660000  | 10.436000 |
| C | -4.743000  | -0.593000 | 12.177000 |
| H | -4.017000  | -1.329000 | 12.541000 |
| H | -5.693000  | -1.128000 | 12.069000 |
| C | -4.901000  | 0.527000  | 13.217000 |
| H | -5.220000  | 0.131000  | 14.185000 |
| H | -3.958000  | 1.059000  | 13.370000 |
| H | -5.646000  | 1.260000  | 12.896000 |
| C | -10.192000 | 2.433000  | -2.919000 |
| H | -10.617000 | 2.039000  | -1.987000 |
| H | -9.637000  | 3.338000  | -2.642000 |
| C | -11.337000 | 2.816000  | -3.873000 |
| H | -10.913000 | 3.213000  | -4.802000 |
| H | -11.890000 | 1.912000  | -4.152000 |
| N | 0.622000   | -3.031000 | -2.291000 |
| C | 1.990000   | -2.568000 | -2.577000 |
| H | 2.343000   | -3.127000 | -3.445000 |
| H | 1.981000   | -1.520000 | -2.863000 |
| C | 2.939000   | -2.774000 | -1.382000 |
| H | 2.592000   | -2.156000 | -0.548000 |
| H | 2.891000   | -3.816000 | -1.045000 |
| C | 4.390000   | -2.399000 | -1.727000 |
| H | 4.753000   | -3.048000 | -2.534000 |
| H | 4.406000   | -1.377000 | -2.115000 |
| C | 5.336000   | -2.513000 | -0.520000 |

|   |           |           |           |
|---|-----------|-----------|-----------|
| H | 4.972000  | -1.859000 | 0.282000  |
| H | 5.302000  | -3.534000 | -0.122000 |
| C | 6.794000  | -2.144000 | -0.844000 |
| H | 6.825000  | -1.128000 | -1.255000 |
| H | 7.169000  | -2.806000 | -1.634000 |
| C | 7.728000  | -2.228000 | 0.375000  |
| H | 7.347000  | -1.569000 | 1.164000  |
| H | 7.696000  | -3.245000 | 0.785000  |
| C | 9.187000  | -1.853000 | 0.065000  |
| H | 9.218000  | -0.838000 | -0.349000 |
| H | 9.573000  | -2.516000 | -0.719000 |
| C | 10.111000 | -1.928000 | 1.293000  |
| H | 9.720000  | -1.268000 | 2.078000  |
| H | 10.082000 | -2.943000 | 1.705000  |
| C | 11.570000 | -1.545000 | 0.993000  |
| H | 11.599000 | -0.530000 | 0.579000  |
| H | 11.964000 | -2.206000 | 0.212000  |
| C | 12.488000 | -1.614000 | 2.226000  |
| H | 12.092000 | -0.955000 | 3.008000  |
| H | 12.462000 | -2.630000 | 2.640000  |
| C | 13.948000 | -1.227000 | 1.932000  |
| H | 13.973000 | -0.213000 | 1.516000  |
| H | 14.344000 | -1.887000 | 1.152000  |
| C | 14.854000 | -1.296000 | 3.170000  |
| H | 15.882000 | -1.016000 | 2.929000  |
| H | 14.501000 | -0.621000 | 3.955000  |



H 14.874000 -2.307000 3.588000  
C -12.307000 3.844000 -3.272000  
H -13.107000 4.095000 -3.973000  
H -12.773000 3.460000 -2.360000  
H -11.788000 4.771000 -3.014000  
Br -1.801000 -8.601000 -3.063000

### **ISQI**

C -0.244000 -4.391000 -1.569000  
C -1.572000 -4.366000 -1.135000  
C -2.306000 -5.542000 -1.056000  
C -1.681000 -6.744000 -1.422000  
C -0.353000 -6.768000 -1.854000  
C 0.387000 -5.580000 -1.931000  
H -3.334000 -5.539000 -0.722000  
H 0.113000 -7.702000 -2.129000  
H 1.415000 -5.609000 -2.260000  
C -0.656000 -2.169000 -1.131000  
C -0.562000 -0.786000 -0.993000  
H -1.458000 -0.352000 -0.569000  
C 0.369000 0.219000 -1.254000  
C 1.684000 0.588000 -1.838000  
O 2.638000 -0.002000 -2.406000  
C 1.454000 2.005000 -1.515000  
C 0.127000 1.652000 -0.964000  
C 2.276000 3.070000 -1.909000

|   |           |           |           |
|---|-----------|-----------|-----------|
| C | 2.270000  | 4.437000  | -1.702000 |
| H | 3.071000  | 2.733000  | -2.570000 |
| O | -0.860000 | 2.246000  | -0.466000 |
| C | 2.746000  | 6.749000  | -1.961000 |
| C | 1.808000  | 6.553000  | -0.932000 |
| C | 1.259000  | 7.625000  | -0.225000 |
| H | 0.526000  | 7.481000  | 0.554000  |
| C | 2.616000  | 9.126000  | -1.588000 |
| C | 3.065000  | 10.471000 | -1.961000 |
| O | 3.887000  | 10.740000 | -2.849000 |
| N | 1.563000  | 5.176000  | -0.778000 |
| C | 2.807000  | 5.295000  | -4.042000 |
| H | 1.748000  | 5.487000  | -4.217000 |
| H | 3.387000  | 6.027000  | -4.607000 |
| H | 3.043000  | 4.300000  | -4.422000 |
| C | 0.764000  | 4.615000  | 0.314000  |
| H | 0.601000  | 5.382000  | 1.066000  |
| H | -0.186000 | 4.218000  | -0.038000 |
| H | 1.315000  | 3.792000  | 0.771000  |
| C | 1.675000  | 8.913000  | -0.565000 |
| H | 1.268000  | 9.766000  | -0.043000 |
| C | 3.156000  | 8.025000  | -2.291000 |
| H | 3.879000  | 8.212000  | -3.073000 |
| C | 3.148000  | 5.398000  | -2.535000 |
| C | 4.656000  | 5.116000  | -2.304000 |
| H | 4.910000  | 5.181000  | -1.246000 |

|   |           |           |           |
|---|-----------|-----------|-----------|
| H | 4.923000  | 4.121000  | -2.664000 |
| H | 5.257000  | 5.849000  | -2.847000 |
| C | -4.988000 | -1.029000 | -2.645000 |
| H | -4.523000 | -1.077000 | -3.637000 |
| H | -5.686000 | -1.874000 | -2.593000 |
| C | -5.775000 | 0.287000  | -2.520000 |
| H | -6.250000 | 0.334000  | -1.533000 |
| H | -5.076000 | 1.130000  | -2.564000 |
| C | -6.846000 | 0.456000  | -3.610000 |
| H | -6.369000 | 0.397000  | -4.596000 |
| H | -7.549000 | -0.384000 | -3.560000 |
| C | -7.629000 | 1.777000  | -3.509000 |
| H | -8.113000 | 1.837000  | -2.527000 |
| H | -6.926000 | 2.617000  | -3.556000 |
| C | -8.691000 | 1.943000  | -4.609000 |
| H | -8.206000 | 1.876000  | -5.591000 |
| H | -9.396000 | 1.104000  | -4.560000 |
| O | 2.477000  | 11.478000 | -1.209000 |
| H | 2.811000  | 12.349000 | -1.498000 |
| C | -1.967000 | -2.931000 | -0.792000 |
| C | -2.354000 | -2.905000 | 0.736000  |
| H | -3.345000 | -3.369000 | 0.800000  |
| H | -1.672000 | -3.590000 | 1.250000  |
| C | -3.151000 | -2.532000 | -1.749000 |
| H | -3.888000 | -3.339000 | -1.665000 |
| H | -2.766000 | -2.585000 | -2.773000 |

|   |           |           |           |
|---|-----------|-----------|-----------|
| C | -3.897000 | -1.199000 | -1.569000 |
| H | -3.214000 | -0.351000 | -1.633000 |
| H | -4.366000 | -1.158000 | -0.582000 |
| C | -2.366000 | -1.587000 | 1.532000  |
| H | -1.354000 | -1.179000 | 1.590000  |
| H | -2.977000 | -0.826000 | 1.043000  |
| C | -2.897000 | -1.806000 | 2.962000  |
| H | -2.307000 | -2.590000 | 3.452000  |
| H | -3.926000 | -2.182000 | 2.914000  |
| C | -2.860000 | -0.531000 | 3.822000  |
| H | -1.829000 | -0.165000 | 3.879000  |
| H | -3.437000 | 0.257000  | 3.325000  |
| C | -3.405000 | -0.738000 | 5.246000  |
| H | -2.832000 | -1.532000 | 5.741000  |
| H | -4.439000 | -1.098000 | 5.189000  |
| C | -3.358000 | 0.533000  | 6.110000  |
| H | -2.323000 | 0.891000  | 6.170000  |
| H | -3.928000 | 1.328000  | 5.614000  |
| C | -3.907000 | 0.330000  | 7.533000  |
| H | -3.339000 | -0.467000 | 8.029000  |
| H | -4.943000 | -0.025000 | 7.473000  |
| C | -3.856000 | 1.600000  | 8.399000  |
| H | -2.820000 | 1.954000  | 8.459000  |
| H | -4.423000 | 2.398000  | 7.903000  |
| C | -4.406000 | 1.398000  | 9.821000  |
| H | -5.442000 | 1.045000  | 9.760000  |

|   |            |           |           |
|---|------------|-----------|-----------|
| H | -3.839000  | 0.600000  | 10.317000 |
| C | -4.354000  | 2.668000  | 10.687000 |
| H | -3.318000  | 3.022000  | 10.749000 |
| H | -4.921000  | 3.466000  | 10.193000 |
| C | -4.903000  | 2.466000  | 12.110000 |
| H | -4.336000  | 1.669000  | 12.604000 |
| H | -5.938000  | 2.112000  | 12.049000 |
| C | -4.848000  | 3.740000  | 12.968000 |
| H | -5.246000  | 3.563000  | 13.970000 |
| H | -3.821000  | 4.098000  | 13.076000 |
| H | -5.433000  | 4.545000  | 12.515000 |
| C | -9.471000  | 3.265000  | -4.521000 |
| H | -9.959000  | 3.333000  | -3.541000 |
| H | -8.767000  | 4.105000  | -4.571000 |
| C | -10.530000 | 3.429000  | -5.625000 |
| H | -10.042000 | 3.359000  | -6.604000 |
| H | -11.235000 | 2.591000  | -5.574000 |
| N | 0.279000   | -3.076000 | -1.569000 |
| C | 1.673000   | -2.819000 | -1.962000 |
| H | 1.915000   | -3.523000 | -2.761000 |
| H | 1.768000   | -1.823000 | -2.382000 |
| C | 2.661000   | -2.981000 | -0.791000 |
| H | 2.460000   | -2.202000 | -0.050000 |
| H | 2.497000   | -3.943000 | -0.293000 |
| C | 4.120000   | -2.875000 | -1.266000 |
| H | 4.333000   | -3.692000 | -1.968000 |

|   |           |           |           |
|---|-----------|-----------|-----------|
| H | 4.241000  | -1.941000 | -1.820000 |
| C | 5.136000  | -2.924000 | -0.112000 |
| H | 4.944000  | -2.086000 | 0.568000  |
| H | 4.986000  | -3.839000 | 0.475000  |
| C | 6.597000  | -2.863000 | -0.590000 |
| H | 6.729000  | -1.975000 | -1.221000 |
| H | 6.804000  | -3.728000 | -1.232000 |
| C | 7.621000  | -2.824000 | 0.557000  |
| H | 7.425000  | -1.946000 | 1.183000  |
| H | 7.478000  | -3.699000 | 1.202000  |
| C | 9.080000  | -2.784000 | 0.072000  |
| H | 9.210000  | -1.932000 | -0.606000 |
| H | 9.288000  | -3.682000 | -0.523000 |
| C | 10.108000 | -2.682000 | 1.212000  |
| H | 9.905000  | -1.778000 | 1.799000  |
| H | 9.976000  | -3.528000 | 1.897000  |
| C | 11.566000 | -2.650000 | 0.722000  |
| H | 11.691000 | -1.818000 | 0.018000  |
| H | 11.775000 | -3.564000 | 0.153000  |
| C | 12.596000 | -2.512000 | 1.855000  |
| H | 12.388000 | -1.595000 | 2.421000  |
| H | 12.472000 | -3.342000 | 2.562000  |
| C | 14.053000 | -2.481000 | 1.363000  |
| H | 14.174000 | -1.656000 | 0.651000  |
| H | 14.263000 | -3.399000 | 0.803000  |
| C | 15.075000 | -2.328000 | 2.499000  |

H 16.098000 -2.309000 2.116000  
H 14.910000 -1.401000 3.055000  
H 15.002000 -3.156000 3.210000  
C -11.303000 4.753000 -5.533000  
H -12.047000 4.837000 -6.328000  
H -11.827000 4.838000 -4.577000  
H -10.629000 5.610000 -5.617000  
I -2.784000 -8.580000 -1.309000

#### **SQS4**

C 0.744000 -3.674000 -4.104000  
C -0.567000 -4.107000 -3.886000  
C -1.018000 -5.276000 -4.485000  
C -0.141000 -6.005000 -5.305000  
C 1.168000 -5.560000 -5.511000  
C 1.634000 -4.384000 -4.909000  
H -2.029000 -5.629000 -4.327000  
H 1.836000 -6.130000 -6.143000  
H 2.649000 -4.052000 -5.071000  
C -0.162000 -2.074000 -2.717000  
C -0.395000 -0.934000 -1.948000  
H -1.381000 -0.931000 -1.504000  
C 0.281000 0.232000 -1.594000  
C 1.498000 1.074000 -1.745000  
O 2.590000 1.009000 -2.363000  
C 0.920000 2.102000 -0.867000

|   |           |           |           |
|---|-----------|-----------|-----------|
| C | -0.306000 | 1.288000  | -0.735000 |
| C | 1.476000  | 3.368000  | -0.623000 |
| C | 1.132000  | 4.450000  | 0.163000  |
| H | 2.354000  | 3.539000  | -1.241000 |
| O | -1.428000 | 1.378000  | -0.178000 |
| C | 1.045000  | 6.661000  | 1.028000  |
| C | 0.142000  | 5.828000  | 1.714000  |
| C | -0.674000 | 6.318000  | 2.737000  |
| H | -1.381000 | 5.688000  | 3.256000  |
| C | 0.336000  | 8.512000  | 2.396000  |
| C | 0.464000  | 9.934000  | 2.731000  |
| O | 1.231000  | 10.740000 | 2.185000  |
| N | 0.229000  | 4.521000  | 1.205000  |
| C | 1.527000  | 6.383000  | -1.450000 |
| H | 0.459000  | 6.422000  | -1.669000 |
| H | 1.934000  | 7.392000  | -1.545000 |
| H | 2.008000  | 5.747000  | -2.194000 |
| C | -0.452000 | 3.371000  | 1.805000  |
| H | -0.829000 | 3.654000  | 2.784000  |
| H | -1.260000 | 3.003000  | 1.177000  |
| H | 0.264000  | 2.558000  | 1.930000  |
| C | -0.565000 | 7.669000  | 3.070000  |
| H | -1.183000 | 8.082000  | 3.852000  |
| C | 1.150000  | 7.995000  | 1.363000  |
| H | 1.836000  | 8.662000  | 0.859000  |
| C | 1.781000  | 5.840000  | -0.021000 |



|   |           |           |           |
|---|-----------|-----------|-----------|
| C | 3.304000  | 5.790000  | 0.271000  |
| H | 3.499000  | 5.401000  | 1.271000  |
| H | 3.816000  | 5.154000  | -0.453000 |
| H | 3.728000  | 6.794000  | 0.205000  |
| C | -4.739000 | -1.320000 | -3.842000 |
| H | -4.321000 | -0.672000 | -4.621000 |
| H | -5.160000 | -2.191000 | -4.359000 |
| C | -5.866000 | -0.571000 | -3.111000 |
| H | -6.284000 | -1.219000 | -2.330000 |
| H | -5.446000 | 0.299000  | -2.594000 |
| C | -6.998000 | -0.111000 | -4.046000 |
| H | -6.582000 | 0.540000  | -4.823000 |
| H | -7.413000 | -0.983000 | -4.567000 |
| C | -8.133000 | 0.630000  | -3.318000 |
| H | -8.548000 | -0.021000 | -2.539000 |
| H | -7.720000 | 1.503000  | -2.799000 |
| C | -9.267000 | 1.085000  | -4.253000 |
| H | -8.853000 | 1.739000  | -5.031000 |
| H | -9.677000 | 0.212000  | -4.775000 |
| O | -0.376000 | 10.338000 | 3.758000  |
| H | -0.249000 | 11.289000 | 3.938000  |
| C | -1.269000 | -3.141000 | -2.935000 |
| C | -1.627000 | -3.955000 | -1.632000 |
| H | -2.496000 | -4.570000 | -1.894000 |
| H | -0.808000 | -4.658000 | -1.458000 |
| C | -2.528000 | -2.561000 | -3.678000 |

|   |           |           |           |
|---|-----------|-----------|-----------|
| H | -3.021000 | -3.419000 | -4.146000 |
| H | -2.161000 | -1.941000 | -4.503000 |
| C | -3.606000 | -1.781000 | -2.904000 |
| H | -3.186000 | -0.902000 | -2.411000 |
| H | -4.034000 | -2.412000 | -2.121000 |
| C | -1.905000 | -3.232000 | -0.301000 |
| H | -0.997000 | -2.732000 | 0.045000  |
| H | -2.659000 | -2.452000 | -0.415000 |
| C | -2.376000 | -4.218000 | 0.785000  |
| H | -1.634000 | -5.018000 | 0.899000  |
| H | -3.303000 | -4.705000 | 0.457000  |
| C | -2.613000 | -3.547000 | 2.149000  |
| H | -1.681000 | -3.078000 | 2.487000  |
| H | -3.337000 | -2.733000 | 2.029000  |
| C | -3.115000 | -4.517000 | 3.232000  |
| H | -2.390000 | -5.332000 | 3.354000  |
| H | -4.047000 | -4.986000 | 2.893000  |
| C | -3.354000 | -3.844000 | 4.594000  |
| H | -2.421000 | -3.381000 | 4.936000  |
| H | -4.073000 | -3.026000 | 4.470000  |
| C | -3.867000 | -4.809000 | 5.677000  |
| H | -3.147000 | -5.626000 | 5.803000  |
| H | -4.799000 | -5.273000 | 5.333000  |
| C | -4.109000 | -4.133000 | 7.037000  |
| H | -3.177000 | -3.669000 | 7.380000  |
| H | -4.829000 | -3.315000 | 6.910000  |

|   |            |           |           |
|---|------------|-----------|-----------|
| C | -4.624000  | -5.096000 | 8.120000  |
| H | -5.556000  | -5.561000 | 7.776000  |
| H | -3.904000  | -5.913000 | 8.249000  |
| C | -4.869000  | -4.419000 | 9.480000  |
| H | -3.938000  | -3.952000 | 9.824000  |
| H | -5.591000  | -3.604000 | 9.353000  |
| C | -5.380000  | -5.382000 | 10.565000 |
| H | -4.658000  | -6.196000 | 10.693000 |
| H | -6.310000  | -5.850000 | 10.221000 |
| C | -5.623000  | -4.696000 | 11.918000 |
| H | -5.981000  | -5.407000 | 12.667000 |
| H | -4.704000  | -4.244000 | 12.301000 |
| H | -6.370000  | -3.903000 | 11.830000 |
| C | -10.406000 | 1.821000  | -3.527000 |
| H | -10.820000 | 1.168000  | -2.749000 |
| H | -9.997000  | 2.695000  | -3.006000 |
| C | -11.540000 | 2.275000  | -4.461000 |
| H | -11.127000 | 2.928000  | -5.238000 |
| H | -11.948000 | 1.401000  | -4.983000 |
| N | 0.961000   | -2.459000 | -3.402000 |
| C | 2.272000   | -1.793000 | -3.434000 |
| H | 2.689000   | -1.952000 | -4.430000 |
| H | 2.153000   | -0.720000 | -3.311000 |
| C | 3.235000   | -2.330000 | -2.358000 |
| H | 2.838000   | -2.075000 | -1.371000 |
| H | 3.279000   | -3.423000 | -2.412000 |

|   |           |           |           |
|---|-----------|-----------|-----------|
| C | 4.646000  | -1.737000 | -2.514000 |
| H | 5.051000  | -2.018000 | -3.494000 |
| H | 4.570000  | -0.647000 | -2.503000 |
| C | 5.619000  | -2.202000 | -1.417000 |
| H | 5.226000  | -1.900000 | -0.438000 |
| H | 5.664000  | -3.298000 | -1.406000 |
| C | 7.039000  | -1.637000 | -1.588000 |
| H | 6.991000  | -0.543000 | -1.606000 |
| H | 7.433000  | -1.943000 | -2.565000 |
| C | 8.017000  | -2.085000 | -0.488000 |
| H | 7.628000  | -1.771000 | 0.489000  |
| H | 8.057000  | -3.181000 | -0.464000 |
| C | 9.440000  | -1.530000 | -0.669000 |
| H | 9.400000  | -0.435000 | -0.693000 |
| H | 9.827000  | -1.843000 | -1.646000 |
| C | 10.421000 | -1.977000 | 0.429000  |
| H | 10.036000 | -1.661000 | 1.406000  |
| H | 10.459000 | -3.073000 | 0.455000  |
| C | 11.844000 | -1.425000 | 0.242000  |
| H | 11.806000 | -0.330000 | 0.216000  |
| H | 12.228000 | -1.741000 | -0.736000 |
| C | 12.827000 | -1.872000 | 1.338000  |
| H | 12.447000 | -1.554000 | 2.316000  |
| H | 12.865000 | -2.968000 | 1.365000  |
| C | 14.252000 | -1.323000 | 1.148000  |
| H | 14.214000 | -0.228000 | 1.120000  |

H 14.632000 -1.640000 0.170000  
C 15.227000 -1.773000 2.246000  
H 16.229000 -1.370000 2.081000  
H 14.893000 -1.438000 3.232000  
H 15.308000 -2.863000 2.278000  
H -0.481000 -6.916000 -5.779000  
C -12.674000 3.007000 -3.727000  
H -13.462000 3.318000 -4.417000  
H -13.130000 2.365000 -2.968000  
H -12.301000 3.902000 -3.222000

**Coordinates of optimized oxidized ISQ-X<sup>+</sup> dyes**

**ISQF<sup>+</sup>**

C -1.866000 0.552000 -4.475000  
C -0.982000 1.623000 -4.639000  
C -1.008000 2.368000 -5.812000  
C -1.930000 1.982000 -6.780000  
C -2.806000 0.911000 -6.639000  
C -2.780000 0.169000 -5.454000  
H -0.355000 3.208000 -5.995000  
H -3.484000 0.665000 -7.441000  
H -3.444000 -0.673000 -5.328000  
C -0.597000 0.557000 -2.573000  
C 0.016000 0.117000 -1.360000  
H 0.461000 0.891000 -0.750000  
C 0.250000 -1.166000 -0.946000

C 0.200000 -2.558000 -1.483000  
O -0.231000 -3.089000 -2.523000  
C 0.927000 -3.069000 -0.290000  
C 1.003000 -1.674000 0.236000  
C 1.444000 -4.328000 -0.073000  
C 2.160000 -4.873000 1.014000  
H 1.350000 -4.996000 -0.925000  
O 1.526000 -1.114000 1.217000  
C 3.651000 -6.203000 2.274000  
C 3.018000 -5.265000 3.099000  
C 3.288000 -5.154000 4.461000  
H 2.810000 -4.416000 5.088000  
C 4.871000 -6.987000 4.189000  
C 5.871000 -7.928000 4.740000  
O 6.469000 -8.783000 4.080000  
N 2.105000 -4.504000 2.312000  
C 4.273000 -5.694000 -0.140000  
H 4.801000 -4.793000 0.171000  
H 4.990000 -6.514000 -0.183000  
H 3.876000 -5.536000 -1.144000  
C 1.159000 -3.553000 2.913000  
H 0.933000 -3.881000 3.924000  
H 1.570000 -2.547000 2.913000  
H 0.242000 -3.552000 2.328000  
C 4.231000 -6.034000 4.999000  
H 4.478000 -5.985000 6.048000

|   |           |           |           |
|---|-----------|-----------|-----------|
| C | 4.581000  | -7.074000 | 2.814000  |
| H | 5.093000  | -7.818000 | 2.220000  |
| C | 3.135000  | -6.051000 | 0.853000  |
| C | 2.385000  | -7.328000 | 0.379000  |
| H | 1.573000  | -7.589000 | 1.059000  |
| H | 1.974000  | -7.192000 | -0.622000 |
| H | 3.084000  | -8.164000 | 0.345000  |
| C | 3.901000  | 1.697000  | -3.397000 |
| H | 3.984000  | 0.682000  | -3.804000 |
| H | 4.024000  | 2.379000  | -4.246000 |
| C | 5.036000  | 1.933000  | -2.386000 |
| H | 4.945000  | 2.943000  | -1.968000 |
| H | 4.918000  | 1.241000  | -1.543000 |
| C | 6.441000  | 1.762000  | -2.989000 |
| H | 6.528000  | 0.759000  | -3.425000 |
| H | 6.567000  | 2.468000  | -3.818000 |
| C | 7.572000  | 1.970000  | -1.968000 |
| H | 7.481000  | 2.970000  | -1.526000 |
| H | 7.448000  | 1.259000  | -1.142000 |
| C | 8.980000  | 1.809000  | -2.567000 |
| H | 9.069000  | 0.814000  | -3.020000 |
| H | 9.110000  | 2.530000  | -3.383000 |
| O | 6.082000  | -7.761000 | 6.089000  |
| H | 6.746000  | -8.394000 | 6.425000  |
| C | -0.114000 | 1.766000  | -3.394000 |
| C | -0.460000 | 3.158000  | -2.722000 |

|   |           |          |           |
|---|-----------|----------|-----------|
| H | 0.084000  | 3.904000 | -3.309000 |
| H | -1.521000 | 3.349000 | -2.901000 |
| C | 1.394000  | 1.633000 | -3.820000 |
| H | 1.533000  | 2.337000 | -4.646000 |
| H | 1.528000  | 0.636000 | -4.252000 |
| C | 2.500000  | 1.889000 | -2.784000 |
| H | 2.398000  | 1.215000 | -1.930000 |
| H | 2.426000  | 2.908000 | -2.397000 |
| C | -0.189000 | 3.394000 | -1.224000 |
| H | -0.858000 | 2.772000 | -0.620000 |
| H | 0.832000  | 3.120000 | -0.953000 |
| C | -0.421000 | 4.871000 | -0.850000 |
| H | -1.431000 | 5.168000 | -1.154000 |
| H | 0.269000  | 5.500000 | -1.425000 |
| C | -0.237000 | 5.160000 | 0.650000  |
| H | -0.942000 | 4.550000 | 1.227000  |
| H | 0.767000  | 4.846000 | 0.960000  |
| C | -0.436000 | 6.643000 | 1.008000  |
| H | -1.437000 | 6.959000 | 0.690000  |
| H | 0.273000  | 7.250000 | 0.434000  |
| C | -0.262000 | 6.944000 | 2.506000  |
| H | -0.980000 | 6.347000 | 3.082000  |
| H | 0.734000  | 6.618000 | 2.827000  |
| C | -0.446000 | 8.431000 | 2.854000  |
| H | -1.440000 | 8.758000 | 2.528000  |
| H | 0.275000  | 9.026000 | 2.281000  |



|   |           |           |           |
|---|-----------|-----------|-----------|
| C | -0.279000 | 8.738000  | 4.352000  |
| H | -1.006000 | 8.150000  | 4.925000  |
| H | 0.713000  | 8.404000  | 4.681000  |
| C | -0.450000 | 10.228000 | 4.694000  |
| H | 0.281000  | 10.815000 | 4.124000  |
| H | -1.439000 | 10.564000 | 4.360000  |
| C | -0.290000 | 10.538000 | 6.192000  |
| H | -1.024000 | 9.956000  | 6.763000  |
| H | 0.698000  | 10.198000 | 6.529000  |
| C | -0.453000 | 12.029000 | 6.532000  |
| H | -1.438000 | 12.369000 | 6.195000  |
| H | 0.282000  | 12.610000 | 5.964000  |
| C | -0.294000 | 12.330000 | 8.030000  |
| H | -0.416000 | 13.395000 | 8.238000  |
| H | -1.037000 | 11.789000 | 8.622000  |
| H | 0.695000  | 12.032000 | 8.389000  |
| C | 10.108000 | 1.999000  | -1.540000 |
| H | 10.021000 | 2.993000  | -1.085000 |
| H | 9.980000  | 1.277000  | -0.723000 |
| C | 11.518000 | 1.840000  | -2.136000 |
| H | 11.604000 | 0.848000  | -2.595000 |
| H | 11.649000 | 2.564000  | -2.947000 |
| N | -1.624000 | -0.043000 | -3.199000 |
| C | -2.546000 | -1.066000 | -2.645000 |
| H | -2.643000 | -1.860000 | -3.383000 |
| H | -2.078000 | -1.505000 | -1.774000 |

C -3.909000 -0.462000 -2.257000  
H -3.750000 0.318000 -1.506000  
H -4.378000 0.020000 -3.117000  
C -4.851000 -1.542000 -1.693000  
H -4.998000 -2.326000 -2.445000  
H -4.376000 -2.027000 -0.832000  
C -6.220000 -0.985000 -1.266000  
H -6.075000 -0.201000 -0.514000  
H -6.700000 -0.502000 -2.125000  
C -7.159000 -2.064000 -0.701000  
H -6.675000 -2.553000 0.154000  
H -7.307000 -2.845000 -1.456000  
C -8.528000 -1.519000 -0.261000  
H -8.382000 -0.741000 0.498000  
H -9.013000 -1.028000 -1.113000  
C -9.465000 -2.604000 0.298000  
H -8.978000 -3.099000 1.147000  
H -9.614000 -3.378000 -0.464000  
C -10.834000 -2.064000 0.746000  
H -10.686000 -1.291000 1.510000  
H -11.321000 -1.567000 -0.102000  
C -11.769000 -3.152000 1.300000  
H -11.280000 -3.652000 2.145000  
H -11.919000 -3.923000 0.534000  
C -13.138000 -2.616000 1.753000  
H -12.990000 -1.846000 2.520000

|   |            |           |           |
|---|------------|-----------|-----------|
| H | -13.628000 | -2.116000 | 0.909000  |
| C | -14.072000 | -3.705000 | 2.306000  |
| H | -13.582000 | -4.206000 | 3.149000  |
| H | -14.221000 | -4.474000 | 1.539000  |
| C | -15.436000 | -3.162000 | 2.757000  |
| H | -16.073000 | -3.960000 | 3.146000  |
| H | -15.322000 | -2.414000 | 3.546000  |
| H | -15.967000 | -2.689000 | 1.926000  |
| C | 12.637000  | 2.022000  | -1.100000 |
| H | 13.623000  | 1.904000  | -1.554000 |
| H | 12.597000  | 3.016000  | -0.647000 |
| H | 12.552000  | 1.288000  | -0.294000 |
| F | -1.971000  | 2.711000  | -7.970000 |

### **ISQCI<sup>+</sup>**

|   |           |          |           |
|---|-----------|----------|-----------|
| C | -2.118000 | 1.111000 | -4.211000 |
| C | -1.197000 | 2.159000 | -4.266000 |
| C | -1.243000 | 3.068000 | -5.315000 |
| C | -2.228000 | 2.882000 | -6.288000 |
| C | -3.143000 | 1.829000 | -6.241000 |
| C | -3.096000 | 0.917000 | -5.183000 |
| H | -0.548000 | 3.891000 | -5.395000 |
| H | -3.880000 | 1.720000 | -7.022000 |
| H | -3.796000 | 0.096000 | -5.147000 |
| C | -0.761000 | 0.787000 | -2.398000 |
| C | -0.170000 | 0.210000 | -1.237000 |

|   |           |           |           |
|---|-----------|-----------|-----------|
| H | 0.360000  | 0.905000  | -0.599000 |
| C | -0.044000 | -1.107000 | -0.880000 |
| C | -0.193000 | -2.470000 | -1.469000 |
| O | -0.664000 | -2.932000 | -2.523000 |
| C | 0.505000  | -3.075000 | -0.301000 |
| C | 0.676000  | -1.709000 | 0.277000  |
| C | 0.941000  | -4.371000 | -0.139000 |
| C | 1.634000  | -4.999000 | 0.920000  |
| H | 0.800000  | -4.999000 | -1.014000 |
| O | 1.234000  | -1.223000 | 1.278000  |
| C | 3.059000  | -6.457000 | 2.113000  |
| C | 2.485000  | -5.517000 | 2.980000  |
| C | 2.771000  | -5.474000 | 4.342000  |
| H | 2.340000  | -4.736000 | 5.002000  |
| C | 4.248000  | -7.379000 | 3.986000  |
| C | 5.198000  | -8.395000 | 4.491000  |
| O | 5.741000  | -9.257000 | 3.794000  |
| N | 1.609000  | -4.678000 | 2.231000  |
| C | 3.690000  | -5.886000 | -0.285000 |
| H | 4.271000  | -5.030000 | 0.058000  |
| H | 4.359000  | -6.742000 | -0.369000 |
| H | 3.294000  | -5.664000 | -1.277000 |
| C | 0.723000  | -3.699000 | 2.876000  |
| H | 0.491000  | -4.049000 | 3.878000  |
| H | 1.188000  | -2.716000 | 2.906000  |
| H | -0.199000 | -3.628000 | 2.304000  |

|   |          |           |           |
|---|----------|-----------|-----------|
| C | 3.667000 | -6.425000 | 4.838000  |
| H | 3.925000 | -6.430000 | 5.885000  |
| C | 3.943000 | -7.397000 | 2.611000  |
| H | 4.409000 | -8.146000 | 1.985000  |
| C | 2.542000 | -6.221000 | 0.704000  |
| C | 1.719000 | -7.435000 | 0.188000  |
| H | 0.900000 | -7.679000 | 0.865000  |
| H | 1.309000 | -7.237000 | -0.803000 |
| H | 2.371000 | -8.305000 | 0.114000  |
| C | 3.722000 | 1.524000  | -3.409000 |
| H | 3.689000 | 1.101000  | -4.420000 |
| H | 3.943000 | 2.590000  | -3.530000 |
| C | 4.859000 | 0.856000  | -2.618000 |
| H | 4.881000 | 1.262000  | -1.599000 |
| H | 4.647000 | -0.216000 | -2.517000 |
| C | 6.241000 | 1.040000  | -3.267000 |
| H | 6.214000 | 0.649000  | -4.291000 |
| H | 6.459000 | 2.111000  | -3.354000 |
| C | 7.379000 | 0.352000  | -2.493000 |
| H | 7.405000 | 0.739000  | -1.467000 |
| H | 7.165000 | -0.720000 | -2.412000 |
| C | 8.762000 | 0.543000  | -3.141000 |
| H | 8.734000 | 0.165000  | -4.170000 |
| H | 8.980000 | 1.615000  | -3.215000 |
| O | 5.428000 | -8.291000 | 5.843000  |
| H | 6.057000 | -8.972000 | 6.149000  |

|   |           |          |           |
|---|-----------|----------|-----------|
| C | -0.246000 | 2.070000 | -3.078000 |
| C | -0.493000 | 3.349000 | -2.177000 |
| H | -0.447000 | 4.196000 | -2.868000 |
| H | -1.527000 | 3.311000 | -1.822000 |
| C | 1.229000  | 1.966000 | -3.622000 |
| H | 1.511000  | 2.984000 | -3.910000 |
| H | 1.193000  | 1.391000 | -4.552000 |
| C | 2.340000  | 1.363000 | -2.744000 |
| H | 2.150000  | 0.298000 | -2.585000 |
| H | 2.369000  | 1.826000 | -1.756000 |
| C | 0.442000  | 3.658000 | -0.996000 |
| H | 0.439000  | 2.852000 | -0.258000 |
| H | 1.471000  | 3.764000 | -1.347000 |
| C | 0.025000  | 4.962000 | -0.283000 |
| H | -1.013000 | 4.874000 | 0.057000  |
| H | 0.045000  | 5.790000 | -1.001000 |
| C | 0.926000  | 5.304000 | 0.916000  |
| H | 0.903000  | 4.475000 | 1.633000  |
| H | 1.965000  | 5.388000 | 0.577000  |
| C | 0.520000  | 6.603000 | 1.633000  |
| H | -0.524000 | 6.526000 | 1.959000  |
| H | 0.558000  | 7.437000 | 0.922000  |
| C | 1.406000  | 6.931000 | 2.847000  |
| H | 1.365000  | 6.098000 | 3.559000  |
| H | 2.451000  | 7.006000 | 2.522000  |
| C | 1.005000  | 8.231000 | 3.566000  |

|   |           |           |           |
|---|-----------|-----------|-----------|
| H | -0.042000 | 8.160000  | 3.883000  |
| H | 1.056000  | 9.067000  | 2.858000  |
| C | 1.883000  | 8.549000  | 4.789000  |
| H | 1.832000  | 7.713000  | 5.497000  |
| H | 2.931000  | 8.618000  | 4.473000  |
| C | 1.485000  | 9.848000  | 5.510000  |
| H | 1.542000  | 10.685000 | 4.804000  |
| H | 0.436000  | 9.781000  | 5.822000  |
| C | 2.358000  | 10.160000 | 6.737000  |
| H | 2.301000  | 9.323000  | 7.444000  |
| H | 3.408000  | 10.228000 | 6.427000  |
| C | 1.961000  | 11.459000 | 7.461000  |
| H | 0.912000  | 11.392000 | 7.769000  |
| H | 2.019000  | 12.295000 | 6.755000  |
| C | 2.837000  | 11.761000 | 8.686000  |
| H | 2.529000  | 12.687000 | 9.176000  |
| H | 2.772000  | 10.957000 | 9.424000  |
| H | 3.887000  | 11.868000 | 8.403000  |
| C | 9.900000  | -0.153000 | -2.377000 |
| H | 9.929000  | 0.223000  | -1.347000 |
| H | 9.685000  | -1.227000 | -2.305000 |
| C | 11.283000 | 0.041000  | -3.023000 |
| H | 11.253000 | -0.331000 | -4.053000 |
| H | 11.500000 | 1.112000  | -3.091000 |
| N | -1.848000 | 0.328000  | -3.048000 |
| C | -2.820000 | -0.690000 | -2.577000 |

|   |            |           |           |
|---|------------|-----------|-----------|
| H | -3.030000  | -1.357000 | -3.411000 |
| H | -2.344000  | -1.287000 | -1.815000 |
| C | -4.100000  | -0.040000 | -2.020000 |
| H | -3.829000  | 0.626000  | -1.194000 |
| H | -4.579000  | 0.582000  | -2.781000 |
| C | -5.097000  | -1.103000 | -1.522000 |
| H | -5.348000  | -1.784000 | -2.342000 |
| H | -4.620000  | -1.716000 | -0.748000 |
| C | -6.390000  | -0.490000 | -0.957000 |
| H | -6.139000  | 0.205000  | -0.147000 |
| H | -6.876000  | 0.110000  | -1.736000 |
| C | -7.383000  | -1.542000 | -0.433000 |
| H | -6.897000  | -2.138000 | 0.348000  |
| H | -7.632000  | -2.239000 | -1.242000 |
| C | -8.679000  | -0.931000 | 0.127000  |
| H | -8.429000  | -0.228000 | 0.930000  |
| H | -9.169000  | -0.341000 | -0.656000 |
| C | -9.668000  | -1.981000 | 0.664000  |
| H | -9.178000  | -2.570000 | 1.448000  |
| H | -9.918000  | -2.685000 | -0.138000 |
| C | -10.964000 | -1.371000 | 1.223000  |
| H | -10.714000 | -0.663000 | 2.023000  |
| H | -11.456000 | -0.784000 | 0.438000  |
| C | -11.952000 | -2.419000 | 1.765000  |
| H | -11.460000 | -3.007000 | 2.549000  |
| H | -12.203000 | -3.125000 | 0.965000  |



|    |            |           |           |
|----|------------|-----------|-----------|
| C  | -13.247000 | -1.810000 | 2.327000  |
| H  | -12.997000 | -1.104000 | 3.128000  |
| H  | -13.740000 | -1.221000 | 1.544000  |
| C  | -14.236000 | -2.858000 | 2.867000  |
| H  | -13.743000 | -3.447000 | 3.648000  |
| H  | -14.487000 | -3.561000 | 2.066000  |
| C  | -15.525000 | -2.241000 | 3.429000  |
| H  | -16.205999 | -3.011000 | 3.800000  |
| H  | -15.310000 | -1.561000 | 4.257000  |
| H  | -16.056000 | -1.671000 | 2.662000  |
| C  | 12.413000  | -0.662000 | -2.256000 |
| H  | 13.380000  | -0.502000 | -2.738000 |
| H  | 12.487000  | -0.288000 | -1.232000 |
| H  | 12.243000  | -1.741000 | -2.204000 |
| Cl | -2.313000  | 4.051000  | -7.674000 |

### **ISQBr<sup>+</sup>**

|   |           |           |           |
|---|-----------|-----------|-----------|
| C | -2.003000 | 0.689000  | -3.942000 |
| C | -1.229000 | 1.850000  | -3.998000 |
| C | -1.382000 | 2.735000  | -5.059000 |
| C | -2.316000 | 2.411000  | -6.049000 |
| C | -3.078000 | 1.240000  | -5.998000 |
| C | -2.929000 | 0.355000  | -4.927000 |
| H | -0.804000 | 3.644000  | -5.130000 |
| H | -3.781000 | 1.018000  | -6.787000 |
| H | -3.512000 | -0.554000 | -4.891000 |

C -0.645000 0.572000 -2.106000  
C 0.066000 0.043000 -0.987000  
H 0.480000 0.776000 -0.307000  
C 0.427000 -1.254000 -0.741000  
C 0.465000 -2.577000 -1.433000  
O 0.020000 -3.027000 -2.504000  
C 1.306000 -3.145000 -0.345000  
C 1.289000 -1.818000 0.337000  
C 1.955000 -4.360000 -0.301000  
C 2.796000 -4.931000 0.679000  
H 1.875000 -4.940000 -1.216000  
O 1.817000 -1.325000 1.350000  
C 4.518000 -6.185000 1.699000  
C 3.833000 -5.427000 2.658000  
C 4.180000 -5.422000 4.006000  
H 3.659000 -4.822000 4.736000  
C 5.957000 -6.993000 3.445000  
C 7.103000 -7.846000 3.832000  
O 7.754000 -8.544000 3.050000  
N 2.782000 -4.712000 2.011000  
C 4.904000 -5.362000 -0.679000  
H 5.349000 -4.442000 -0.301000  
H 5.704000 -6.081000 -0.857000  
H 4.419000 -5.149000 -1.632000  
C 1.770000 -3.959000 2.766000  
H 1.643000 -4.429000 3.738000

|   |          |           |           |
|---|----------|-----------|-----------|
| H | 2.063000 | -2.918000 | 2.873000  |
| H | 0.827000 | -4.001000 | 2.227000  |
| C | 5.260000 | -6.222000 | 4.390000  |
| H | 5.572000 | -6.249000 | 5.423000  |
| C | 5.584000 | -6.977000 | 2.087000  |
| H | 6.143000 | -7.582000 | 1.387000  |
| C | 3.890000 | -5.955000 | 0.335000  |
| C | 3.261000 | -7.261000 | -0.229000 |
| H | 2.535000 | -7.686000 | 0.465000  |
| H | 2.768000 | -7.078000 | -1.184000 |
| H | 4.048000 | -7.998000 | -0.392000 |
| C | 3.682000 | 2.260000  | -2.942000 |
| H | 3.842000 | 1.325000  | -3.491000 |
| H | 3.690000 | 3.061000  | -3.690000 |
| C | 4.841000 | 2.476000  | -1.954000 |
| H | 4.675000 | 3.406000  | -1.397000 |
| H | 4.839000 | 1.669000  | -1.212000 |
| C | 6.220000 | 2.536000  | -2.635000 |
| H | 6.382000 | 1.614000  | -3.206000 |
| H | 6.228000 | 3.354000  | -3.364000 |
| C | 7.381000 | 2.729000  | -1.644000 |
| H | 7.216000 | 3.647000  | -1.068000 |
| H | 7.377000 | 1.907000  | -0.918000 |
| C | 8.761000 | 2.799000  | -2.322000 |
| H | 8.924000 | 1.885000  | -2.906000 |
| H | 8.768000 | 3.626000  | -3.041000 |

|   |           |           |           |
|---|-----------|-----------|-----------|
| O | 7.383000  | -7.790000 | 5.178000  |
| H | 8.143000  | -8.362000 | 5.405000  |
| C | -0.316000 | 1.918000  | -2.779000 |
| C | -0.754000 | 3.170000  | -1.913000 |
| H | -0.301000 | 4.036000  | -2.406000 |
| H | -1.835000 | 3.286000  | -2.032000 |
| C | 1.174000  | 1.993000  | -3.273000 |
| H | 1.206000  | 2.811000  | -3.999000 |
| H | 1.380000  | 1.080000  | -3.842000 |
| C | 2.303000  | 2.219000  | -2.254000 |
| H | 2.314000  | 1.427000  | -1.501000 |
| H | 2.149000  | 3.162000  | -1.723000 |
| C | -0.442000 | 3.217000  | -0.406000 |
| H | -1.029000 | 2.456000  | 0.118000  |
| H | 0.609000  | 3.001000  | -0.208000 |
| C | -0.780000 | 4.597000  | 0.194000  |
| H | -1.819000 | 4.853000  | -0.040000 |
| H | -0.159000 | 5.361000  | -0.288000 |
| C | -0.572000 | 4.656000  | 1.717000  |
| H | -1.222000 | 3.917000  | 2.200000  |
| H | 0.458000  | 4.361000  | 1.954000  |
| C | -0.849000 | 6.045000  | 2.319000  |
| H | -1.872000 | 6.351000  | 2.068000  |
| H | -0.185000 | 6.781000  | 1.850000  |
| C | -0.665000 | 6.096000  | 3.845000  |
| H | -1.342000 | 5.372000  | 4.315000  |

|   |           |           |           |
|---|-----------|-----------|-----------|
| H | 0.352000  | 5.772000  | 4.097000  |
| C | -0.915000 | 7.489000  | 4.447000  |
| H | -1.928000 | 7.819000  | 4.188000  |
| H | -0.231000 | 8.210000  | 3.985000  |
| C | -0.744000 | 7.535000  | 5.975000  |
| H | -1.434000 | 6.819000  | 6.438000  |
| H | 0.266000  | 7.198000  | 6.236000  |
| C | -0.984000 | 8.930000  | 6.578000  |
| H | -0.290000 | 9.645000  | 6.121000  |
| H | -1.993000 | 9.269000  | 6.313000  |
| C | -0.822000 | 8.974000  | 8.107000  |
| H | -1.517000 | 8.260000  | 8.566000  |
| H | 0.186000  | 8.634000  | 8.374000  |
| C | -1.061000 | 10.369000 | 8.711000  |
| H | -2.067000 | 10.709000 | 8.442000  |
| H | -0.365000 | 11.082000 | 8.255000  |
| C | -0.901000 | 10.404000 | 10.238000 |
| H | -1.078000 | 11.406000 | 10.634000 |
| H | -1.607000 | 9.725000  | 10.724000 |
| H | 0.107000  | 10.102000 | 10.537000 |
| C | 9.922000  | 2.979000  | -1.330000 |
| H | 9.759000  | 3.892000  | -0.744000 |
| H | 9.917000  | 2.150000  | -0.611000 |
| C | 11.303000 | 3.053000  | -2.005000 |
| H | 11.465000 | 2.142000  | -2.592000 |
| H | 11.310000 | 3.883000  | -2.720000 |

N -1.646000 -0.039000 -2.767000  
C -2.454000 -1.197000 -2.310000  
H -2.538000 -1.892000 -3.144000  
H -1.906000 -1.707000 -1.531000  
C -3.831000 -0.752000 -1.781000  
H -3.681000 -0.075000 -0.934000  
H -4.372000 -0.187000 -2.544000  
C -4.678000 -1.958000 -1.335000  
H -4.831000 -2.632000 -2.186000  
H -4.128000 -2.533000 -0.581000  
C -6.044000 -1.545000 -0.761000  
H -5.889000 -0.875000 0.093000  
H -6.592000 -0.964000 -1.511000  
C -6.905000 -2.740000 -0.317000  
H -6.352000 -3.329000 0.424000  
H -7.073000 -3.403000 -1.174000  
C -8.262000 -2.325000 0.277000  
H -8.093000 -1.666000 1.137000  
H -8.812000 -1.729000 -0.461000  
C -9.131000 -3.516000 0.715000  
H -8.578000 -4.117000 1.447000  
H -9.309000 -4.170000 -0.148000  
C -10.482000 -3.097000 1.320000  
H -10.303000 -2.446000 2.184000  
H -11.033000 -2.493000 0.590000  
C -11.356000 -4.286000 1.755000

|    |            |           |           |
|----|------------|-----------|-----------|
| H  | -10.803000 | -4.894000 | 2.482000  |
| H  | -11.539000 | -4.935000 | 0.890000  |
| C  | -12.702000 | -3.865000 | 2.367000  |
| H  | -12.519000 | -3.218000 | 3.233000  |
| H  | -13.255000 | -3.256000 | 1.642000  |
| C  | -13.580000 | -5.052000 | 2.802000  |
| H  | -13.027000 | -5.662000 | 3.525000  |
| H  | -13.765000 | -5.698000 | 1.936000  |
| C  | -14.920000 | -4.620000 | 3.415000  |
| H  | -15.518000 | -5.484000 | 3.713000  |
| H  | -14.766000 | -4.000000 | 4.302000  |
| H  | -15.511000 | -4.038000 | 2.702000  |
| C  | 12.456000  | 3.229000  | -1.005000 |
| H  | 13.421000  | 3.275000  | -1.515000 |
| H  | 12.341000  | 4.150000  | -0.428000 |
| H  | 12.494000  | 2.396000  | -0.297000 |
| Br | -2.552000  | 3.635000  | -7.562000 |

### **ISQI<sup>+</sup>**

|   |           |          |           |
|---|-----------|----------|-----------|
| C | -2.209000 | 0.920000 | -3.314000 |
| C | -1.449000 | 2.092000 | -3.338000 |
| C | -1.692000 | 3.056000 | -4.307000 |
| C | -2.700000 | 2.810000 | -5.251000 |
| C | -3.445000 | 1.623000 | -5.228000 |
| C | -3.206000 | 0.655000 | -4.248000 |
| H | -1.122000 | 3.973000 | -4.343000 |

H -4.208000 1.448000 -5.971000  
H -3.778000 -0.261000 -4.241000  
C -0.709000 0.672000 -1.607000  
C 0.092000 0.060000 -0.594000  
H 0.545000 0.735000 0.120000  
C 0.485000 -1.247000 -0.505000  
C 0.481000 -2.491000 -1.331000  
O -0.040000 -2.834000 -2.408000  
C 1.401000 -3.159000 -0.372000  
C 1.430000 -1.908000 0.442000  
C 2.044000 -4.371000 -0.507000  
C 2.946000 -5.055000 0.334000  
H 1.888000 -4.845000 -1.472000  
O 2.031000 -1.513000 1.458000  
C 4.702000 -6.454000 1.070000  
C 4.122000 -5.787000 2.157000  
C 4.576000 -5.940000 3.464000  
H 4.137000 -5.410000 4.296000  
C 6.243000 -7.490000 2.594000  
C 7.383000 -8.413000 2.791000  
O 7.946000 -9.036000 1.886000  
N 3.049000 -4.979000 1.679000  
C 4.926000 -5.384000 -1.228000  
H 5.427000 -4.520000 -0.792000  
H 5.689000 -6.096000 -1.546000  
H 4.376000 -5.058000 -2.112000



|   |          |           |           |
|---|----------|-----------|-----------|
| C | 2.127000 | -4.284000 | 2.589000  |
| H | 2.083000 | -4.834000 | 3.525000  |
| H | 2.446000 | -3.258000 | 2.756000  |
| H | 1.136000 | -4.268000 | 2.141000  |
| C | 5.652000 | -6.807000 | 3.670000  |
| H | 6.042000 | -6.957000 | 4.665000  |
| C | 5.765000 | -7.314000 | 1.281000  |
| H | 6.243000 | -7.854000 | 0.476000  |
| C | 3.976000 | -6.061000 | -0.206000 |
| C | 3.265000 | -7.282000 | -0.855000 |
| H | 2.580000 | -7.763000 | -0.157000 |
| H | 2.708000 | -6.983000 | -1.744000 |
| H | 4.013000 | -8.015000 | -1.158000 |
| C | 3.540000 | 2.351000  | -2.697000 |
| H | 3.615000 | 1.454000  | -3.324000 |
| H | 3.512000 | 3.204000  | -3.384000 |
| C | 4.791000 | 2.454000  | -1.808000 |
| H | 4.719000 | 3.351000  | -1.182000 |
| H | 4.815000 | 1.601000  | -1.119000 |
| C | 6.105000 | 2.498000  | -2.606000 |
| H | 6.167000 | 1.611000  | -3.249000 |
| H | 6.092000 | 3.363000  | -3.279000 |
| C | 7.359000 | 2.566000  | -1.717000 |
| H | 7.298000 | 3.452000  | -1.073000 |
| H | 7.371000 | 1.699000  | -1.044000 |
| C | 8.674000 | 2.607000  | -2.513000 |

|   |           |           |           |
|---|-----------|-----------|-----------|
| H | 8.729000  | 1.728000  | -3.167000 |
| H | 8.669000  | 3.481000  | -3.175000 |
| O | 7.769000  | -8.517000 | 4.107000  |
| H | 8.522000  | -9.131000 | 4.207000  |
| C | -0.436000 | 2.068000  | -2.197000 |
| C | -0.793000 | 3.249000  | -1.206000 |
| H | -0.400000 | 4.153000  | -1.682000 |
| H | -1.881000 | 3.357000  | -1.210000 |
| C | 1.006000  | 2.179000  | -2.816000 |
| H | 0.983000  | 3.059000  | -3.465000 |
| H | 1.143000  | 1.320000  | -3.482000 |
| C | 2.227000  | 2.299000  | -1.890000 |
| H | 2.278000  | 1.454000  | -1.199000 |
| H | 2.154000  | 3.204000  | -1.282000 |
| C | -0.333000 | 3.209000  | 0.263000  |
| H | -0.851000 | 2.405000  | 0.796000  |
| H | 0.737000  | 3.008000  | 0.345000  |
| C | -0.640000 | 4.543000  | 0.971000  |
| H | -1.708000 | 4.768000  | 0.874000  |
| H | -0.109000 | 5.353000  | 0.457000  |
| C | -0.252000 | 4.550000  | 2.460000  |
| H | -0.796000 | 3.754000  | 2.982000  |
| H | 0.813000  | 4.310000  | 2.558000  |
| C | -0.534000 | 5.895000  | 3.150000  |
| H | -1.600000 | 6.135000  | 3.053000  |
| H | 0.008000  | 6.690000  | 2.624000  |

|   |           |           |           |
|---|-----------|-----------|-----------|
| C | -0.144000 | 5.919000  | 4.638000  |
| H | -0.692000 | 5.131000  | 5.169000  |
| H | 0.920000  | 5.672000  | 4.736000  |
| C | -0.415000 | 7.272000  | 5.317000  |
| H | -1.479000 | 7.518000  | 5.219000  |
| H | 0.131000  | 8.059000  | 4.782000  |
| C | -0.022000 | 7.306000  | 6.804000  |
| H | -0.571000 | 6.524000  | 7.341000  |
| H | 1.041000  | 7.056000  | 6.902000  |
| C | -0.287000 | 8.664000  | 7.475000  |
| H | 0.261000  | 9.446000  | 6.936000  |
| H | -1.350000 | 8.914000  | 7.378000  |
| C | 0.107000  | 8.703000  | 8.962000  |
| H | -0.443000 | 7.924000  | 9.503000  |
| H | 1.170000  | 8.453000  | 9.061000  |
| C | -0.156000 | 10.063000 | 9.631000  |
| H | -1.218000 | 10.314000 | 9.533000  |
| H | 0.393000  | 10.842000 | 9.090000  |
| C | 0.242000  | 10.095000 | 11.115000 |
| H | 0.045000  | 11.073000 | 11.559000 |
| H | -0.317000 | 9.350000  | 11.689000 |
| H | 1.306000  | 9.880000  | 11.242000 |
| C | 9.928000  | 2.654000  | -1.624000 |
| H | 9.875000  | 3.532000  | -0.968000 |
| H | 9.936000  | 1.779000  | -0.962000 |
| C | 11.245000 | 2.696000  | -2.418000 |

|   |            |           |           |
|---|------------|-----------|-----------|
| H | 11.296000  | 1.822000  | -3.077000 |
| H | 11.241000  | 3.574000  | -3.074000 |
| N | -1.756000  | 0.106000  | -2.232000 |
| C | -2.507000  | -1.106000 | -1.821000 |
| H | -2.615000  | -1.742000 | -2.698000 |
| H | -1.902000  | -1.652000 | -1.110000 |
| C | -3.866000  | -0.756000 | -1.187000 |
| H | -3.696000  | -0.147000 | -0.293000 |
| H | -4.467000  | -0.151000 | -1.869000 |
| C | -4.642000  | -2.031000 | -0.809000 |
| H | -4.791000  | -2.645000 | -1.705000 |
| H | -4.039000  | -2.635000 | -0.120000 |
| C | -6.008000  | -1.740000 | -0.163000 |
| H | -5.862000  | -1.134000 | 0.739000  |
| H | -6.611000  | -1.133000 | -0.848000 |
| C | -6.784000  | -3.018000 | 0.200000  |
| H | -6.182000  | -3.623000 | 0.889000  |
| H | -6.919000  | -3.625000 | -0.703000 |
| C | -8.158000  | -2.746000 | 0.835000  |
| H | -8.026000  | -2.146000 | 1.744000  |
| H | -8.759000  | -2.136000 | 0.150000  |
| C | -8.931000  | -4.030000 | 1.181000  |
| H | -8.332000  | -4.638000 | 1.870000  |
| H | -9.055000  | -4.631000 | 0.272000  |
| C | -10.313000 | -3.771000 | 1.805000  |
| H | -10.192000 | -3.176000 | 2.718000  |

|   |            |           |           |
|---|------------|-----------|-----------|
| H | -10.911000 | -3.160000 | 1.118000  |
| C | -11.083000 | -5.060000 | 2.137000  |
| H | -10.486000 | -5.670000 | 2.826000  |
| H | -11.199000 | -5.656000 | 1.224000  |
| C | -12.469000 | -4.809000 | 2.755000  |
| H | -12.356000 | -4.219000 | 3.672000  |
| H | -13.066000 | -4.197000 | 2.069000  |
| C | -13.239000 | -6.101000 | 3.079000  |
| H | -12.643000 | -6.713000 | 3.765000  |
| H | -13.351000 | -6.692000 | 2.162000  |
| C | -14.624000 | -5.845000 | 3.693000  |
| H | -15.144000 | -6.781000 | 3.906000  |
| H | -14.543000 | -5.289000 | 4.631000  |
| H | -15.254000 | -5.262000 | 3.016000  |
| C | 12.492000  | 2.734000  | -1.521000 |
| H | 13.408000  | 2.766000  | -2.114000 |
| H | 12.485000  | 3.615000  | -0.873000 |
| H | 12.542000  | 1.851000  | -0.879000 |
| I | -3.103000  | 4.269000  | -6.755000 |

**SQS4<sup>+</sup>**

|   |           |          |           |
|---|-----------|----------|-----------|
| C | -1.842000 | 0.480000 | -4.683000 |
| C | -0.956000 | 1.545000 | -4.860000 |
| C | -0.972000 | 2.258000 | -6.054000 |
| C | -1.877000 | 1.874000 | -7.055000 |
| C | -2.749000 | 0.794000 | -6.861000 |

C -2.746000 0.075000 -5.661000  
H -0.302000 3.090000 -6.221000  
H -3.431000 0.507000 -7.649000  
H -3.413000 -0.763000 -5.520000  
C -0.602000 0.530000 -2.762000  
C -0.011000 0.122000 -1.525000  
H 0.417000 0.914000 -0.924000  
C 0.224000 -1.147000 -1.075000  
C 0.191000 -2.556000 -1.572000  
O -0.217000 -3.118000 -2.603000  
C 0.895000 -3.026000 -0.349000  
C 0.954000 -1.618000 0.138000  
C 1.416000 -4.276000 -0.085000  
C 2.109000 -4.783000 1.034000  
H 1.350000 -4.967000 -0.920000  
O 1.453000 -1.028000 1.113000  
C 3.583000 -6.061000 2.368000  
C 2.921000 -5.105000 3.150000  
C 3.158000 -4.953000 4.514000  
H 2.658000 -4.203000 5.108000  
C 4.766000 -6.775000 4.333000  
C 5.762000 -7.689000 4.934000  
O 6.384000 -8.556000 4.313000  
N 2.020000 -4.377000 2.320000  
C 4.257000 -5.615000 -0.045000  
H 4.769000 -4.700000 0.253000

|   |          |           |           |
|---|----------|-----------|-----------|
| H | 4.983000 | -6.429000 | -0.047000 |
| H | 3.882000 | -5.490000 | -1.061000 |
| C | 1.051000 | -3.419000 | 2.870000  |
| H | 0.801000 | -3.720000 | 3.884000  |
| H | 1.453000 | -2.408000 | 2.854000  |
| H | 0.150000 | -3.442000 | 2.262000  |
| C | 4.095000 | -5.807000 | 5.100000  |
| H | 4.317000 | -5.725000 | 6.153000  |
| C | 4.509000 | -6.905000 | 2.955000  |
| H | 5.043000 | -7.660000 | 2.394000  |
| C | 3.099000 | -5.955000 | 0.931000  |
| C | 2.373000 | -7.253000 | 0.478000  |
| H | 1.548000 | -7.502000 | 1.145000  |
| H | 1.985000 | -7.150000 | -0.537000 |
| H | 3.080000 | -8.083000 | 0.485000  |
| C | 3.910000 | 1.629000  | -3.543000 |
| H | 3.991000 | 0.607000  | -3.932000 |
| H | 4.051000 | 2.296000  | -4.401000 |
| C | 5.030000 | 1.874000  | -2.517000 |
| H | 4.940000 | 2.891000  | -2.118000 |
| H | 4.893000 | 1.197000  | -1.665000 |
| C | 6.443000 | 1.681000  | -3.095000 |
| H | 6.528000 | 0.672000  | -3.515000 |
| H | 6.588000 | 2.374000  | -3.932000 |
| C | 7.560000 | 1.895000  | -2.060000 |
| H | 7.469000 | 2.902000  | -1.633000 |

|   |           |           |           |
|---|-----------|-----------|-----------|
| H | 7.418000  | 1.196000  | -1.226000 |
| C | 8.975000  | 1.716000  | -2.635000 |
| H | 9.063000  | 0.714000  | -3.073000 |
| H | 9.122000  | 2.423000  | -3.459000 |
| O | 5.937000  | -7.482000 | 6.283000  |
| H | 6.599000  | -8.098000 | 6.652000  |
| C | -0.106000 | 1.717000  | -3.606000 |
| C | -0.457000 | 3.125000  | -2.971000 |
| H | 0.098000  | 3.856000  | -3.567000 |
| H | -1.515000 | 3.315000  | -3.172000 |
| C | 1.408000  | 1.571000  | -4.005000 |
| H | 1.561000  | 2.258000  | -4.842000 |
| H | 1.544000  | 0.565000  | -4.416000 |
| C | 2.500000  | 1.842000  | -2.957000 |
| H | 2.380000  | 1.187000  | -2.091000 |
| H | 2.425000  | 2.870000  | -2.592000 |
| C | -0.209000 | 3.395000  | -1.476000 |
| H | -0.889000 | 2.788000  | -0.869000 |
| H | 0.807000  | 3.126000  | -1.182000 |
| C | -0.443000 | 4.881000  | -1.136000 |
| H | -1.449000 | 5.173000  | -1.459000 |
| H | 0.256000  | 5.496000  | -1.714000 |
| C | -0.278000 | 5.197000  | 0.360000  |
| H | -0.994000 | 4.599000  | 0.938000  |
| H | 0.720000  | 4.884000  | 0.689000  |
| C | -0.476000 | 6.686000  | 0.691000  |



|   |           |           |           |
|---|-----------|-----------|-----------|
| H | -1.471000 | 7.002000  | 0.356000  |
| H | 0.244000  | 7.281000  | 0.116000  |
| C | -0.319000 | 7.009000  | 2.186000  |
| H | -1.047000 | 6.424000  | 2.761000  |
| H | 0.672000  | 6.683000  | 2.524000  |
| C | -0.499000 | 8.501000  | 2.511000  |
| H | -1.488000 | 8.829000  | 2.171000  |
| H | 0.231000  | 9.086000  | 1.938000  |
| C | -0.345000 | 8.828000  | 4.007000  |
| H | -1.079000 | 8.249000  | 4.580000  |
| H | 0.643000  | 8.494000  | 4.349000  |
| C | -0.513000 | 10.322000 | 4.329000  |
| H | 0.222000  | 10.900000 | 3.757000  |
| H | -1.500000 | 10.657000 | 3.985000  |
| C | -0.361000 | 10.649000 | 5.824000  |
| H | -1.099000 | 10.075000 | 6.397000  |
| H | 0.624000  | 10.312000 | 6.170000  |
| C | -0.524000 | 12.145000 | 6.147000  |
| H | -1.508000 | 12.482000 | 5.802000  |
| H | 0.213000  | 12.718000 | 5.574000  |
| C | -0.370000 | 12.462000 | 7.642000  |
| H | -0.490000 | 13.530000 | 7.837000  |
| H | -1.116000 | 11.930000 | 8.237000  |
| H | 0.618000  | 12.167000 | 8.008000  |
| C | 10.089000 | 1.913000  | -1.594000 |
| H | 10.000000 | 2.913000  | -1.153000 |

|   |           |           |           |
|---|-----------|-----------|-----------|
| H | 9.945000  | 1.202000  | -0.771000 |
| C | 11.506000 | 1.739000  | -2.167000 |
| H | 11.594000 | 0.742000  | -2.613000 |
| H | 11.653000 | 2.453000  | -2.985000 |
| N | -1.618000 | -0.085000 | -3.388000 |
| C | -2.547000 | -1.096000 | -2.823000 |
| H | -2.645000 | -1.899000 | -3.553000 |
| H | -2.087000 | -1.526000 | -1.945000 |
| C | -3.908000 | -0.479000 | -2.453000 |
| H | -3.748000 | 0.312000  | -1.713000 |
| H | -4.368000 | -0.007000 | -3.324000 |
| C | -4.861000 | -1.542000 | -1.877000 |
| H | -5.014000 | -2.335000 | -2.618000 |
| H | -4.392000 | -2.020000 | -1.009000 |
| C | -6.225000 | -0.966000 | -1.460000 |
| H | -6.072000 | -0.172000 | -0.719000 |
| H | -6.699000 | -0.491000 | -2.327000 |
| C | -7.176000 | -2.026000 | -0.879000 |
| H | -6.698000 | -2.506000 | -0.016000 |
| H | -7.333000 | -2.817000 | -1.621000 |
| C | -8.539000 | -1.458000 | -0.449000 |
| H | -8.384000 | -0.668000 | 0.296000  |
| H | -9.019000 | -0.977000 | -1.310000 |
| C | -9.488000 | -2.521000 | 0.130000  |
| H | -9.007000 | -3.004000 | 0.990000  |
| H | -9.645000 | -3.309000 | -0.615000 |

|   |            |           |           |
|---|------------|-----------|-----------|
| C | -10.852000 | -1.957000 | 0.565000  |
| H | -10.696000 | -1.169000 | 1.313000  |
| H | -11.333000 | -1.473000 | -0.293000 |
| C | -11.799000 | -3.023000 | 1.143000  |
| H | -11.317000 | -3.506000 | 2.002000  |
| H | -11.954000 | -3.810000 | 0.396000  |
| C | -13.163000 | -2.463000 | 1.579000  |
| H | -13.010000 | -1.676000 | 2.327000  |
| H | -13.647000 | -1.979000 | 0.721000  |
| C | -14.109000 | -3.530000 | 2.156000  |
| H | -13.627000 | -4.012000 | 3.014000  |
| H | -14.261000 | -4.317000 | 1.409000  |
| C | -15.471000 | -2.965000 | 2.586000  |
| H | -16.117001 | -3.747000 | 2.991000  |
| H | -15.355000 | -2.198000 | 3.357000  |
| H | -15.993000 | -2.508000 | 1.741000  |
| H | -1.899000  | 2.415000  | -7.990000 |
| C | 12.611000  | 1.929000  | -1.117000 |
| H | 13.603000  | 1.800000  | -1.555000 |
| H | 12.570000  | 2.929000  | -0.677000 |
| H | 12.511000  | 1.205000  | -0.304000 |

**Coordinates of optimized neutral ISQI --- I<sup>-</sup> species**

|   |          |          |           |
|---|----------|----------|-----------|
| C | 2.844000 | 1.936000 | -1.304000 |
| C | 3.500000 | 0.788000 | -0.854000 |
| C | 4.881000 | 0.782000 | -0.707000 |

|   |            |           |           |
|---|------------|-----------|-----------|
| C | 5.590000   | 1.952000  | -1.020000 |
| C | 4.932000   | 3.100000  | -1.467000 |
| C | 3.539000   | 3.104000  | -1.614000 |
| H | 5.403000   | -0.098000 | -0.360000 |
| H | 5.493000   | 3.992000  | -1.702000 |
| H | 3.038000   | 3.999000  | -1.954000 |
| C | 1.153000   | 0.410000  | -0.972000 |
| C | -0.076000  | -0.241000 | -0.905000 |
| H | 0.006000   | -1.237000 | -0.491000 |
| C | -1.407000  | 0.025000  | -1.228000 |
| C | -2.384000  | 0.958000  | -1.846000 |
| O | -2.357000  | 2.088000  | -2.396000 |
| C | -3.481000  | 0.011000  | -1.592000 |
| C | -2.510000  | -0.940000 | -1.007000 |
| C | -4.799000  | 0.155000  | -2.049000 |
| C | -5.965000  | -0.573000 | -1.912000 |
| H | -4.898000  | 1.018000  | -2.703000 |
| O | -2.520000  | -2.099000 | -0.526000 |
| C | -8.166000  | -1.382000 | -2.292000 |
| C | -7.556000  | -2.092000 | -1.242000 |
| C | -8.212000  | -3.134000 | -0.583000 |
| H | -7.742000  | -3.694000 | 0.212000  |
| C | -10.133000 | -2.749000 | -2.037000 |
| C | -11.493000 | -3.071000 | -2.482000 |
| O | -12.109000 | -2.500000 | -3.393000 |
| N | -6.266000  | -1.577000 | -1.016000 |

C -6.861000 -0.533000 -4.298000  
H -6.458000 -1.531000 -4.469000  
H -7.759000 -0.416000 -4.907000  
H -6.122000 0.198000 -4.631000  
C -5.423000 -1.978000 0.113000  
H -6.025000 -2.532000 0.827000  
H -4.569000 -2.571000 -0.207000  
H -5.037000 -1.083000 0.603000  
C -9.508000 -3.453000 -0.993000  
H -10.042000 -4.256000 -0.508000  
C -9.448000 -1.700000 -2.691000  
H -9.949000 -1.172000 -3.491000  
C -7.203000 -0.320000 -2.802000  
C -7.769000 1.107000 -2.578000  
H -8.010000 1.272000 -1.527000  
H -7.048000 1.863000 -2.890000  
H -8.680000 1.240000 -3.164000  
C 2.542000 -3.850000 -2.485000  
H 2.387000 -3.414000 -3.479000  
H 3.624000 -3.999000 -2.382000  
C 1.833000 -5.213000 -2.416000  
H 1.995000 -5.658000 -1.427000  
H 0.752000 -5.062000 -2.511000  
C 2.308000 -6.196000 -3.500000  
H 2.155000 -5.744000 -4.487000  
H 3.389000 -6.352000 -3.399000

C 1.594000 -7.559000 -3.455000  
H 1.749000 -8.017000 -2.471000  
H 0.513000 -7.403000 -3.553000  
C 2.067000 -8.532000 -4.548000  
H 1.916000 -8.069000 -5.531000  
H 3.148000 -8.690000 -4.447000  
O -12.074000 -4.112000 -1.775000  
H -12.975000 -4.282000 -2.111000  
C 2.473000 -0.309000 -0.578000  
C 2.580000 -0.675000 0.951000  
H 3.492000 -1.274000 1.051000  
H 2.777000 0.257000 1.490000  
C 2.806000 -1.511000 -1.539000  
H 3.874000 -1.713000 -1.405000  
H 2.699000 -1.140000 -2.564000  
C 2.058000 -2.850000 -1.417000  
H 0.982000 -2.714000 -1.532000  
H 2.222000 -3.285000 -0.427000  
C 1.428000 -1.392000 1.680000  
H 0.547000 -0.747000 1.704000  
H 1.128000 -2.304000 1.162000  
C 1.823000 -1.749000 3.126000  
H 2.154000 -0.843000 3.648000  
H 2.686000 -2.426000 3.110000  
C 0.680000 -2.403000 3.921000  
H -0.178000 -1.720000 3.946000

|   |           |           |           |
|---|-----------|-----------|-----------|
| H | 0.339000  | -3.300000 | 3.392000  |
| C | 1.072000  | -2.779000 | 5.360000  |
| H | 1.419000  | -1.881000 | 5.887000  |
| H | 1.925000  | -3.468000 | 5.334000  |
| C | -0.075000 | -3.422000 | 6.159000  |
| H | -0.926000 | -2.731000 | 6.188000  |
| H | -0.425000 | -4.317000 | 5.631000  |
| C | 0.317000  | -3.803000 | 7.597000  |
| H | 0.669000  | -2.908000 | 8.125000  |
| H | 1.166000  | -4.496000 | 7.568000  |
| C | -0.831000 | -4.442000 | 8.397000  |
| H | -1.680000 | -3.749000 | 8.427000  |
| H | -1.185000 | -5.336000 | 7.869000  |
| C | -0.440000 | -4.825000 | 9.835000  |
| H | 0.408000  | -5.519000 | 9.805000  |
| H | -0.086000 | -3.931000 | 10.363000 |
| C | -1.588000 | -5.463000 | 10.636000 |
| H | -2.438000 | -4.770000 | 10.666000 |
| H | -1.943000 | -6.358000 | 10.109000 |
| C | -1.198000 | -5.846000 | 12.074000 |
| H | -0.845000 | -4.951000 | 12.600000 |
| H | -0.349000 | -6.538000 | 12.044000 |
| C | -2.350000 | -6.483000 | 12.866000 |
| H | -2.040000 | -6.743000 | 13.880000 |
| H | -3.200000 | -5.799000 | 12.943000 |
| H | -2.703000 | -7.397000 | 12.380000 |

C 1.351000 -9.893000 -4.516000  
H 1.502000 -10.358000 -3.534000  
H 0.271000 -9.736000 -4.617000  
C 1.825000 -10.862000 -5.613000  
H 1.676000 -10.395000 -6.593000  
H 2.904000 -11.020000 -5.511000  
N 1.452000 1.688000 -1.376000  
C 0.520000 2.745000 -1.799000  
H 1.029000 3.332000 -2.565000  
H -0.356000 2.307000 -2.270000  
C 0.079000 3.651000 -0.635000  
H -0.513000 3.059000 0.069000  
H 0.957000 4.011000 -0.088000  
C -0.756000 4.843000 -1.133000  
H -0.141000 5.465000 -1.796000  
H -1.585000 4.463000 -1.735000  
C -1.306000 5.715000 0.009000  
H -1.950000 5.100000 0.649000  
H -0.480000 6.059000 0.643000  
C -2.104000 6.931000 -0.491000  
H -2.896000 6.587000 -1.167000  
H -1.447000 7.573000 -1.091000  
C -2.733000 7.764000 0.639000  
H -3.406000 7.125000 1.224000  
H -1.947000 8.093000 1.330000  
C -3.511000 8.991000 0.134000



|   |           |            |           |
|---|-----------|------------|-----------|
| H | -4.270000 | 8.663000   | -0.587000 |
| H | -2.829000 | 9.649000   | -0.418000 |
| C | -4.196000 | 9.793000   | 1.254000  |
| H | -4.885000 | 9.136000   | 1.798000  |
| H | -3.442000 | 10.115000  | 1.983000  |
| C | -4.966000 | 11.023000  | 0.744000  |
| H | -5.703000 | 10.702000  | -0.002000 |
| H | -4.273000 | 11.691000  | 0.219000  |
| C | -5.682000 | 11.808000  | 1.856000  |
| H | -6.379000 | 11.140000  | 2.378000  |
| H | -4.948000 | 12.129000  | 2.605000  |
| C | -6.452000 | 13.038000  | 1.344000  |
| H | -7.180000 | 12.717000  | 0.590000  |
| H | -5.755000 | 13.709000  | 0.829000  |
| C | -7.175000 | 13.809000  | 2.458000  |
| H | -7.712000 | 14.674000  | 2.061000  |
| H | -7.903000 | 13.172000  | 2.968000  |
| H | -6.469000 | 14.171000  | 3.210000  |
| C | 1.103000  | -12.218000 | -5.577000 |
| H | 1.463000  | -12.882000 | -6.367000 |
| H | 1.260000  | -12.723000 | -4.620000 |
| H | 0.025000  | -12.094000 | -5.713000 |
| I | 7.779000  | 1.972000   | -0.788000 |
| I | 11.202000 | 1.998000   | -0.429000 |

**Coordinates of optimized neutral SQS4 --- I species**

C -0.469000 -4.303000 -1.872000  
C -1.787000 -4.137000 -1.438000  
C -2.656000 -5.221000 -1.433000  
C -2.188000 -6.472000 -1.868000  
C -0.865000 -6.623000 -2.296000  
C 0.020000 -5.536000 -2.302000  
H -3.680000 -5.113000 -1.100000  
H -0.515000 -7.592000 -2.627000  
H 1.041000 -5.665000 -2.630000  
C -0.611000 -2.072000 -1.321000  
C -0.364000 -0.711000 -1.138000  
H -1.211000 -0.193000 -0.709000  
C 0.670000 0.193000 -1.368000  
C 2.030000 0.432000 -1.921000  
O 2.928000 -0.246000 -2.480000  
C 1.940000 1.860000 -1.579000  
C 0.576000 1.639000 -1.055000  
C 2.872000 2.843000 -1.948000  
C 3.000000 4.199000 -1.720000  
H 3.636000 2.437000 -2.606000  
O -0.353000 2.324000 -0.560000  
C 3.710000 6.456000 -1.937000  
C 2.745000 6.340000 -0.920000  
C 2.302000 7.451000 -0.199000  
H 1.549000 7.371000 0.571000  
C 3.822000 8.826000 -1.522000

|   |           |           |           |
|---|-----------|-----------|-----------|
| C | 4.412000  | 10.124000 | -1.865000 |
| O | 5.267000  | 10.322000 | -2.740000 |
| N | 2.359000  | 4.994000  | -0.791000 |
| C | 3.638000  | 5.037000  | -4.041000 |
| H | 2.605000  | 5.339000  | -4.218000 |
| H | 4.294000  | 5.713000  | -4.592000 |
| H | 3.773000  | 4.029000  | -4.436000 |
| C | 1.496000  | 4.499000  | 0.284000  |
| H | 1.398000  | 5.269000  | 1.044000  |
| H | 0.517000  | 4.201000  | -0.085000 |
| H | 1.958000  | 3.621000  | 0.736000  |
| C | 2.853000  | 8.695000  | -0.512000 |
| H | 2.531000  | 9.576000  | 0.022000  |
| C | 4.253000  | 7.688000  | -2.240000 |
| H | 5.000000  | 7.812000  | -3.012000 |
| C | 3.978000  | 5.081000  | -2.530000 |
| C | 5.449000  | 4.644000  | -2.298000 |
| H | 5.700000  | 4.662000  | -1.237000 |
| H | 5.617000  | 3.635000  | -2.676000 |
| H | 6.124000  | 5.323000  | -2.822000 |
| C | -4.902000 | -0.352000 | -2.510000 |
| H | -4.463000 | -0.267000 | -3.511000 |
| H | -5.642000 | -1.161000 | -2.567000 |
| C | -5.616000 | 0.963000  | -2.155000 |
| H | -6.054000 | 0.878000  | -1.154000 |
| H | -4.877000 | 1.771000  | -2.098000 |

|   |           |           |           |
|---|-----------|-----------|-----------|
| C | -6.717000 | 1.349000  | -3.158000 |
| H | -6.278000 | 1.439000  | -4.159000 |
| H | -7.451000 | 0.537000  | -3.218000 |
| C | -7.440000 | 2.659000  | -2.803000 |
| H | -7.877000 | 2.570000  | -1.801000 |
| H | -6.707000 | 3.472000  | -2.745000 |
| C | -8.544000 | 3.041000  | -3.804000 |
| H | -8.106000 | 3.134000  | -4.806000 |
| H | -9.275000 | 2.226000  | -3.864000 |
| O | 3.922000  | 11.174000 | -1.101000 |
| H | 4.348000  | 12.010000 | -1.372000 |
| C | -1.999000 | -2.690000 | -0.999000 |
| C | -2.335000 | -2.720000 | 0.542000  |
| H | -3.376000 | -3.056000 | 0.613000  |
| H | -1.735000 | -3.521000 | 0.985000  |
| C | -3.150000 | -2.081000 | -1.881000 |
| H | -3.945000 | -2.834000 | -1.897000 |
| H | -2.775000 | -2.021000 | -2.908000 |
| C | -3.800000 | -0.738000 | -1.504000 |
| H | -3.064000 | 0.067000  | -1.472000 |
| H | -4.244000 | -0.805000 | -0.507000 |
| C | -2.149000 | -1.466000 | 1.415000  |
| H | -1.089000 | -1.207000 | 1.469000  |
| H | -2.655000 | -0.598000 | 0.989000  |
| C | -2.681000 | -1.694000 | 2.844000  |
| H | -2.192000 | -2.575000 | 3.279000  |

|   |           |           |           |
|---|-----------|-----------|-----------|
| H | -3.751000 | -1.928000 | 2.800000  |
| C | -2.465000 | -0.484000 | 3.768000  |
| H | -1.393000 | -0.262000 | 3.828000  |
| H | -2.933000 | 0.400000  | 3.320000  |
| C | -3.021000 | -0.688000 | 5.187000  |
| H | -2.552000 | -1.572000 | 5.637000  |
| H | -4.094000 | -0.910000 | 5.126000  |
| C | -2.807000 | 0.524000  | 6.110000  |
| H | -1.735000 | 0.742000  | 6.176000  |
| H | -3.271000 | 1.408000  | 5.656000  |
| C | -3.373000 | 0.327000  | 7.527000  |
| H | -2.907000 | -0.555000 | 7.982000  |
| H | -4.445000 | 0.108000  | 7.460000  |
| C | -3.161000 | 1.542000  | 8.446000  |
| H | -2.089000 | 1.762000  | 8.514000  |
| H | -3.626000 | 2.425000  | 7.990000  |
| C | -3.728000 | 1.348000  | 9.863000  |
| H | -4.800000 | 1.127000  | 9.796000  |
| H | -3.262000 | 0.467000  | 10.321000 |
| C | -3.518000 | 2.564000  | 10.782000 |
| H | -2.447000 | 2.787000  | 10.848000 |
| H | -3.986000 | 3.446000  | 10.327000 |
| C | -4.081000 | 2.370000  | 12.200000 |
| H | -3.612000 | 1.490000  | 12.655000 |
| H | -5.152000 | 2.146000  | 12.135000 |
| C | -3.869000 | 3.590000  | 13.109000 |

|   |            |           |           |
|---|------------|-----------|-----------|
| H | -4.275000  | 3.418000  | 14.109000 |
| H | -2.806000  | 3.820000  | 13.217000 |
| H | -4.360000  | 4.477000  | 12.699000 |
| C | -9.273000  | 4.348000  | -3.448000 |
| H | -9.710000  | 4.256000  | -2.446000 |
| H | -8.543000  | 5.165000  | -3.389000 |
| C | -10.378000 | 4.730000  | -4.447000 |
| H | -9.941000  | 4.822000  | -5.448000 |
| H | -11.106000 | 3.913000  | -4.507000 |
| N | 0.211000   | -3.060000 | -1.797000 |
| C | 1.630000   | -2.951000 | -2.169000 |
| H | 1.797000   | -3.638000 | -3.001000 |
| H | 1.849000   | -1.953000 | -2.537000 |
| C | 2.575000   | -3.287000 | -1.000000 |
| H | 2.452000   | -2.530000 | -0.219000 |
| H | 2.293000   | -4.249000 | -0.558000 |
| C | 4.045000   | -3.326000 | -1.452000 |
| H | 4.168000   | -4.105000 | -2.215000 |
| H | 4.289000   | -2.374000 | -1.929000 |
| C | 5.024000   | -3.595000 | -0.297000 |
| H | 4.918000   | -2.804000 | 0.455000  |
| H | 4.753000   | -4.533000 | 0.204000  |
| C | 6.492000   | -3.668000 | -0.751000 |
| H | 6.758000   | -2.733000 | -1.257000 |
| H | 6.598000   | -4.462000 | -1.499000 |
| C | 7.480000   | -3.922000 | 0.400000  |

|   |            |           |           |
|---|------------|-----------|-----------|
| H | 7.381000   | -3.123000 | 1.145000  |
| H | 7.207000   | -4.853000 | 0.912000  |
| C | 8.946000   | -4.008000 | -0.059000 |
| H | 9.219000   | -3.078000 | -0.571000 |
| H | 9.044000   | -4.807000 | -0.804000 |
| C | 9.938000   | -4.264000 | 1.089000  |
| H | 9.843000   | -3.464000 | 1.833000  |
| H | 9.663000   | -5.194000 | 1.603000  |
| C | 11.402000  | -4.356000 | 0.627000  |
| H | 11.677000  | -3.426000 | 0.113000  |
| H | 11.496000  | -5.155000 | -0.118000 |
| C | 12.396000  | -4.613000 | 1.773000  |
| H | 12.305000  | -3.812000 | 2.517000  |
| H | 12.121000  | -5.542000 | 2.288000  |
| C | 13.859000  | -4.708000 | 1.309000  |
| H | 14.134000  | -3.780000 | 0.794000  |
| H | 13.949000  | -5.508000 | 0.565000  |
| C | 14.845000  | -4.965000 | 2.459000  |
| H | 15.873000  | -5.031000 | 2.097000  |
| H | 14.804000  | -4.162000 | 3.200000  |
| H | 14.613000  | -5.902000 | 2.973000  |
| H | -2.855000  | -7.324000 | -1.871000 |
| C | -11.101000 | 6.035000  | -4.082000 |
| H | -11.877000 | 6.279000  | -4.811000 |
| H | -11.579000 | 5.959000  | -3.101000 |
| H | -10.403000 | 6.875000  | -4.045000 |

I -5.864000 -7.011000 -1.585000

**Coordinates of optimized oxidized ISQI<sup>+</sup> --- I<sup>-</sup> species**

C 2.822000 1.849000 -2.144000  
C 3.569000 0.741000 -1.733000  
C 4.956000 0.770000 -1.795000  
C 5.577000 1.932000 -2.276000  
C 4.830000 3.039000 -2.684000  
C 3.430000 3.009000 -2.620000  
H 5.547000 -0.078000 -1.482000  
H 5.325000 3.926000 -3.050000  
H 2.860000 3.872000 -2.931000  
C 1.241000 0.314000 -1.477000  
C 0.054000 -0.355000 -1.190000  
H 0.224000 -1.323000 -0.738000  
C -1.317000 -0.134000 -1.324000  
C -2.400000 0.743000 -1.841000  
O -2.487000 1.838000 -2.451000  
C -3.421000 -0.208000 -1.372000  
C -2.349000 -1.103000 -0.887000  
C -4.796000 -0.116000 -1.634000  
C -5.908000 -0.856000 -1.282000  
H -5.015000 0.705000 -2.313000  
O -2.255000 -2.232000 -0.345000  
C -8.118000 -1.726000 -1.283000  
C -7.340000 -2.361000 -0.298000



C -7.862000 -3.374000 0.510000  
H -7.264000 -3.876000 1.256000  
C -9.987000 -3.112000 -0.659000  
C -11.389000 -3.485000 -0.876000  
O -12.149000 -2.982000 -1.716000  
N -6.045000 -1.810000 -0.297000  
C -7.149000 -0.974000 -3.506000  
H -6.749000 -1.974000 -3.679000  
H -8.131000 -0.911000 -3.979000  
H -6.489000 -0.252000 -3.987000  
C -5.033000 -2.127000 0.714000  
H -5.508000 -2.649000 1.540000  
H -4.220000 -2.722000 0.304000  
H -4.603000 -1.197000 1.090000  
C -9.195000 -3.741000 0.318000  
H -9.630000 -4.523000 0.921000  
C -9.436000 -2.092000 -1.466000  
H -10.065000 -1.622000 -2.210000  
C -7.271000 -0.679000 -1.990000  
C -7.836000 0.748000 -1.764000  
H -7.923000 0.971000 -0.700000  
H -7.190000 1.497000 -2.223000  
H -8.828000 0.829000 -2.213000  
C 2.506000 -4.002000 -2.939000  
H 2.192000 -3.630000 -3.922000  
H 3.595000 -4.125000 -2.992000

C 1.852000 -5.372000 -2.688000  
H 2.171000 -5.753000 -1.711000  
H 0.765000 -5.247000 -2.629000  
C 2.187000 -6.409000 -3.774000  
H 1.877000 -6.019000 -4.751000  
H 3.275000 -6.538000 -3.827000  
C 1.526000 -7.779000 -3.546000  
H 1.838000 -8.175000 -2.572000  
H 0.438000 -7.649000 -3.489000  
C 1.857000 -8.807000 -4.641000  
H 1.550000 -8.407000 -5.615000  
H 2.945000 -8.939000 -4.695000  
O -11.830000 -4.493000 -0.032000  
H -12.766000 -4.700000 -0.220000  
C 2.624000 -0.356000 -1.246000  
C 2.967000 -0.627000 0.269000  
H 3.900000 -1.203000 0.264000  
H 3.216000 0.338000 0.718000  
C 2.843000 -1.606000 -2.177000  
H 3.924000 -1.781000 -2.193000  
H 2.575000 -1.299000 -3.193000  
C 2.159000 -2.950000 -1.868000  
H 1.074000 -2.841000 -1.828000  
H 2.479000 -3.321000 -0.891000  
C 1.956000 -1.321000 1.201000  
H 1.071000 -0.692000 1.321000

|   |           |           |           |
|---|-----------|-----------|-----------|
| H | 1.608000  | -2.268000 | 0.785000  |
| C | 2.571000  | -1.584000 | 2.589000  |
| H | 2.951000  | -0.642000 | 3.003000  |
| H | 3.441000  | -2.244000 | 2.482000  |
| C | 1.577000  | -2.210000 | 3.582000  |
| H | 0.714000  | -1.543000 | 3.696000  |
| H | 1.186000  | -3.144000 | 3.161000  |
| C | 2.188000  | -2.492000 | 4.965000  |
| H | 2.585000  | -1.558000 | 5.382000  |
| H | 3.046000  | -3.165000 | 4.850000  |
| C | 1.191000  | -3.108000 | 5.962000  |
| H | 0.335000  | -2.432000 | 6.079000  |
| H | 0.791000  | -4.039000 | 5.543000  |
| C | 1.802000  | -3.395000 | 7.344000  |
| H | 2.205000  | -2.464000 | 7.761000  |
| H | 2.657000  | -4.072000 | 7.227000  |
| C | 0.804000  | -4.006000 | 8.342000  |
| H | -0.050000 | -3.328000 | 8.459000  |
| H | 0.400000  | -4.937000 | 7.924000  |
| C | 1.414000  | -4.295000 | 9.724000  |
| H | 2.268000  | -4.974000 | 9.606000  |
| H | 1.818000  | -3.365000 | 10.141000 |
| C | 0.416000  | -4.906000 | 10.722000 |
| H | -0.438000 | -4.228000 | 10.840000 |
| H | 0.012000  | -5.836000 | 10.306000 |
| C | 1.026000  | -5.194000 | 12.105000 |

|   |           |            |           |
|---|-----------|------------|-----------|
| H | 1.429000  | -4.264000  | 12.521000 |
| H | 1.879000  | -5.871000  | 11.987000 |
| C | 0.022000  | -5.804000  | 13.095000 |
| H | 0.486000  | -5.998000  | 14.065000 |
| H | -0.826000 | -5.133000  | 13.260000 |
| H | -0.374000 | -6.752000  | 12.720000 |
| C | 1.192000  | -10.177000 | -4.425000 |
| H | 1.499000  | -10.580000 | -3.453000 |
| H | 0.104000  | -10.046000 | -4.372000 |
| C | 1.523000  | -11.201000 | -5.525000 |
| H | 1.218000  | -10.796000 | -6.496000 |
| H | 2.610000  | -11.333000 | -5.577000 |
| N | 1.442000  | 1.571000   | -1.993000 |
| C | 0.428000  | 2.583000   | -2.330000 |
| H | 0.802000  | 3.133000   | -3.196000 |
| H | -0.495000 | 2.102000   | -2.639000 |
| C | 0.140000  | 3.549000   | -1.166000 |
| H | -0.324000 | 2.989000   | -0.349000 |
| H | 1.080000  | 3.957000   | -0.777000 |
| C | -0.791000 | 4.693000   | -1.599000 |
| H | -0.298000 | 5.286000   | -2.381000 |
| H | -1.689000 | 4.262000   | -2.048000 |
| C | -1.189000 | 5.621000   | -0.439000 |
| H | -1.714000 | 5.033000   | 0.324000  |
| H | -0.288000 | 6.018000   | 0.044000  |
| C | -2.086000 | 6.790000   | -0.881000 |

|   |           |            |           |
|---|-----------|------------|-----------|
| H | -2.959000 | 6.391000   | -1.410000 |
| H | -1.543000 | 7.407000   | -1.608000 |
| C | -2.562000 | 7.677000   | 0.282000  |
| H | -3.123000 | 7.062000   | 0.996000  |
| H | -1.691000 | 8.062000   | 0.827000  |
| C | -3.440000 | 8.857000   | -0.169000 |
| H | -4.288000 | 8.473000   | -0.749000 |
| H | -2.865000 | 9.494000   | -0.853000 |
| C | -3.972000 | 9.712000   | 0.994000  |
| H | -4.554000 | 9.076000   | 1.671000  |
| H | -3.127000 | 10.091000  | 1.582000  |
| C | -4.843000 | 10.895000  | 0.537000  |
| H | -5.674000 | 10.516000  | -0.070000 |
| H | -4.253000 | 11.543000  | -0.123000 |
| C | -5.407000 | 11.731000  | 1.698000  |
| H | -5.999000 | 11.083000  | 2.355000  |
| H | -4.578000 | 12.110000  | 2.308000  |
| C | -6.277000 | 12.914000  | 1.238000  |
| H | -7.100000 | 12.535000  | 0.621000  |
| H | -5.683000 | 13.565000  | 0.587000  |
| C | -6.848000 | 13.736000  | 2.403000  |
| H | -7.461000 | 14.566000  | 2.043000  |
| H | -7.474000 | 13.117000  | 3.052000  |
| H | -6.048000 | 14.156000  | 3.019000  |
| C | 0.852000  | -12.565000 | -5.305000 |
| H | 1.109000  | -13.269000 | -6.101000 |

H 1.164000 -13.009000 -4.356000  
H -0.237000 -12.470000 -5.284000  
I 7.707000 2.017000 -2.359000  
I 8.368000 2.773000 1.094000

**Coordinates of optimized oxidized SQS4<sup>+</sup> --- I<sup>-</sup> species**

C 1.075000 -3.608000 -2.957000  
C -0.190000 -4.115000 -2.645000  
C -0.497000 -5.437000 -2.939000  
C 0.476000 -6.245000 -3.548000  
C 1.739000 -5.724000 -3.851000  
C 2.060000 -4.392000 -3.557000  
H -1.471000 -5.849000 -2.704000  
H 2.482000 -6.356000 -4.319000  
H 3.039000 -4.002000 -3.790000  
C -0.037000 -1.826000 -2.014000  
C -0.412000 -0.564000 -1.552000  
H -1.407000 -0.560000 -1.127000  
C 0.127000 0.719000 -1.494000  
C 1.253000 1.626000 -1.842000  
O 2.366000 1.531000 -2.419000  
C 0.543000 2.769000 -1.249000  
C -0.595000 1.883000 -0.926000  
C 0.957000 4.109000 -1.322000  
C 0.476000 5.306000 -0.831000  
H 1.831000 4.218000 -1.959000

|   |           |           |           |
|---|-----------|-----------|-----------|
| O | -1.737000 | 1.985000  | -0.415000 |
| C | 0.132000  | 7.639000  | -0.540000 |
| C | -0.701000 | 6.907000  | 0.326000  |
| C | -1.596000 | 7.541000  | 1.192000  |
| H | -2.250000 | 6.984000  | 1.847000  |
| C | -0.810000 | 9.681000  | 0.324000  |
| C | -0.842000 | 11.147000 | 0.298000  |
| O | -0.146000 | 11.873000 | -0.427000 |
| N | -0.462000 | 5.532000  | 0.157000  |
| C | 0.719000  | 6.816000  | -2.870000 |
| H | -0.339000 | 6.683000  | -3.097000 |
| H | 1.021000  | 7.809000  | -3.209000 |
| H | 1.287000  | 6.073000  | -3.431000 |
| C | -1.038000 | 4.498000  | 1.020000  |
| H | -1.474000 | 4.969000  | 1.896000  |
| H | -1.783000 | 3.901000  | 0.498000  |
| H | -0.245000 | 3.824000  | 1.345000  |
| C | -1.639000 | 8.936000  | 1.180000  |
| H | -2.322000 | 9.458000  | 1.833000  |
| C | 0.086000  | 9.018000  | -0.545000 |
| H | 0.715000  | 9.611000  | -1.195000 |
| C | 0.983000  | 6.671000  | -1.350000 |
| C | 2.492000  | 6.861000  | -1.046000 |
| H | 2.694000  | 6.753000  | 0.020000  |
| H | 3.091000  | 6.127000  | -1.587000 |
| H | 2.811000  | 7.858000  | -1.356000 |

C -4.629000 -1.874000 -3.314000  
H -4.256000 -1.396000 -4.227000  
H -4.941000 -2.886000 -3.602000  
C -5.852000 -1.096000 -2.797000  
H -6.224000 -1.574000 -1.882000  
H -5.541000 -0.085000 -2.509000  
C -6.995000 -1.006000 -3.822000  
H -6.624000 -0.524000 -4.734000  
H -7.300000 -2.019000 -4.113000  
C -8.224000 -0.238000 -3.306000  
H -8.593000 -0.719000 -2.392000  
H -7.920000 0.776000 -3.017000  
C -9.368000 -0.152000 -4.331000  
H -9.000000 0.332000 -5.243000  
H -9.668000 -1.166000 -4.622000  
O -1.752000 11.696000 1.188000  
H -1.731000 12.671000 1.127000  
C -1.019000 -3.027000 -1.967000  
C -1.332000 -3.531000 -0.504000  
H -2.123000 -4.282000 -0.610000  
H -0.449000 -4.076000 -0.158000  
C -2.307000 -2.788000 -2.837000  
H -2.693000 -3.784000 -3.080000  
H -1.981000 -2.354000 -3.788000  
C -3.485000 -1.964000 -2.286000  
H -3.175000 -0.951000 -2.023000



|   |           |           |           |
|---|-----------|-----------|-----------|
| H | -3.869000 | -2.427000 | -1.373000 |
| C | -1.726000 | -2.538000 | 0.605000  |
| H | -0.886000 | -1.872000 | 0.821000  |
| H | -2.553000 | -1.897000 | 0.297000  |
| C | -2.126000 | -3.273000 | 1.899000  |
| H | -1.308000 | -3.935000 | 2.211000  |
| H | -2.986000 | -3.923000 | 1.696000  |
| C | -2.475000 | -2.318000 | 3.053000  |
| H | -1.608000 | -1.682000 | 3.269000  |
| H | -3.276000 | -1.642000 | 2.731000  |
| C | -2.907000 | -3.041000 | 4.339000  |
| H | -2.106000 | -3.717000 | 4.663000  |
| H | -3.774000 | -3.677000 | 4.122000  |
| C | -3.258000 | -2.085000 | 5.491000  |
| H | -2.390000 | -1.453000 | 5.713000  |
| H | -4.055000 | -1.405000 | 5.165000  |
| C | -3.702000 | -2.804000 | 6.776000  |
| H | -2.905000 | -3.482000 | 7.105000  |
| H | -4.570000 | -3.437000 | 6.554000  |
| C | -4.057000 | -1.846000 | 7.926000  |
| H | -3.190000 | -1.213000 | 8.149000  |
| H | -4.854000 | -1.168000 | 7.597000  |
| C | -4.503000 | -2.564000 | 9.211000  |
| H | -5.370000 | -3.198000 | 8.988000  |
| H | -3.706000 | -3.240000 | 9.542000  |
| C | -4.860000 | -1.605000 | 10.360000 |

|   |            |           |           |
|---|------------|-----------|-----------|
| H | -3.995000  | -0.968000 | 10.582000 |
| H | -5.660000  | -0.929000 | 10.031000 |
| C | -5.303000  | -2.321000 | 11.647000 |
| H | -4.504000  | -2.995000 | 11.976000 |
| H | -6.167000  | -2.958000 | 11.425000 |
| C | -5.659000  | -1.356000 | 12.787000 |
| H | -5.965000  | -1.895000 | 13.687000 |
| H | -4.805000  | -0.726000 | 13.051000 |
| H | -6.482000  | -0.694000 | 12.501000 |
| C | -10.600000 | 0.611000  | -3.815000 |
| H | -10.968000 | 0.128000  | -2.902000 |
| H | -10.301000 | 1.626000  | -3.525000 |
| C | -11.745000 | 0.695000  | -4.838000 |
| H | -11.378000 | 1.179000  | -5.750000 |
| H | -12.043000 | -0.319000 | -5.129000 |
| N | 1.142000   | -2.242000 | -2.576000 |
| C | 2.376000   | -1.465000 | -2.765000 |
| H | 2.839000   | -1.818000 | -3.689000 |
| H | 2.142000   | -0.415000 | -2.912000 |
| C | 3.355000   | -1.614000 | -1.585000 |
| H | 2.902000   | -1.170000 | -0.694000 |
| H | 3.515000   | -2.675000 | -1.366000 |
| C | 4.700000   | -0.927000 | -1.875000 |
| H | 5.164000   | -1.394000 | -2.754000 |
| H | 4.511000   | 0.118000  | -2.135000 |
| C | 5.681000   | -0.999000 | -0.692000 |

|   |           |           |           |
|---|-----------|-----------|-----------|
| H | 5.228000  | -0.511000 | 0.179000  |
| H | 5.840000  | -2.047000 | -0.410000 |
| C | 7.040000  | -0.343000 | -0.991000 |
| H | 6.878000  | 0.702000  | -1.279000 |
| H | 7.494000  | -0.834000 | -1.860000 |
| C | 8.023000  | -0.397000 | 0.191000  |
| H | 7.573000  | 0.102000  | 1.058000  |
| H | 8.177000  | -1.443000 | 0.486000  |
| C | 9.386000  | 0.248000  | -0.114000 |
| H | 9.232000  | 1.293000  | -0.409000 |
| H | 9.834000  | -0.252000 | -0.982000 |
| C | 10.372000 | 0.194000  | 1.065000  |
| H | 9.926000  | 0.696000  | 1.932000  |
| H | 10.523000 | -0.851000 | 1.361000  |
| C | 11.736000 | 0.834000  | 0.755000  |
| H | 11.584000 | 1.879000  | 0.458000  |
| H | 12.181000 | 0.332000  | -0.113000 |
| C | 12.724000 | 0.781000  | 1.932000  |
| H | 12.282000 | 1.285000  | 2.799000  |
| H | 12.875000 | -0.264000 | 2.230000  |
| C | 14.089000 | 1.418000  | 1.619000  |
| H | 13.938000 | 2.462000  | 1.321000  |
| H | 14.531000 | 0.914000  | 0.752000  |
| C | 15.070000 | 1.360000  | 2.800000  |
| H | 16.030001 | 1.816000  | 2.545000  |
| H | 14.671000 | 1.888000  | 3.670000  |

H 15.263000 0.326000 3.101000  
H 0.249000 -7.276000 -3.784000  
C -12.972000 1.457000 -4.313000  
H -13.766000 1.501000 -5.063000  
H -13.383000 0.975000 -3.422000  
H -12.711000 2.484000 -4.044000  
I 1.676000 -8.017000 -0.997000

**Table S8.** Description of orbital occupancy of the donors and acceptors described in **Table 3** along with their bond orbitals and coefficients.

|                    |                                                                                  |
|--------------------|----------------------------------------------------------------------------------|
| ISQ-H              | BD (1)C4- H152: 62.39% C4(30.20% s, 69.80% p); 37.61% H 152 (100.00% s)          |
|                    | RY*(1) I157: 100% (0.00% s, 100.00% p)                                           |
|                    | LP (2) I157: 100% (3.18% s, 96.82% p)                                            |
|                    | BD*(1)C4-H152: 37.61% C4(30.20% s, 69.80% p); 62.39% H152 s(100.00%)             |
| ISQ-H <sup>+</sup> | BD (1)C4-H152: 61.54% C4 (29.37% s, 70.63% p); 38.46% H152 (100.00% s)           |
|                    | RY*(1) I157: 100% (0.50% s, 99.50% p)                                            |
| ISQ-I              | BD (1)C4- I156: 60.47% C4(22.84% s, 77.16% p); 39.53% I156 (5.08% s, 94.92% p)   |
|                    | RY*(2) I157: 100% (66.00% s, 34.00% p)                                           |
| ISQ-I <sup>+</sup> | BD (1) C4 - I156: 55.55% C4 (21.20% s, 78.80% p); 44.45% I156(9.92% s, 90.08% p) |
|                    | RY*(1) I157 :100% (14.43% s, 85.57% p)                                           |

**References:**

- 1 C. Cornelissen-G. Rettig. W. Lapouyade. R, *J. Phys. Chem. A*, 1997, **101**, (50), 9673–9677.
- 2 K. Zeng , Y. Lu , W. Tang , S. Zhao , Q. Liu , W. Zhu , H. Tian and Y. Xie , *Chem. Sci.*, 2019, **10** , 2186.
